# Supplementary material for: Novel Sunifiram-carbamate hybrids as potential dual acetylcholinesterase inhibitor and NMDAR co-agonist: simulation-guided analogue design and pharmacological screening
Source: PubMed Central journal article supplement (PMC9067966; doi:10.1080/14756366.2022.2068147), 2022-04-28
Supplement: IENZ_A_2068147_SM5664.pdf [file IENZ_A_2068147_SM5664.pdf]

## Supplementary Materials:

### Novel Sunifiram-Carbamate Hybrids as Potential Dual Acetylcholinesterase Inhibitor and NMDAR Co-Agonist: Simulation-Guided Analogue Design and Pharmacological Screening

Khalid A. Agha,<sup>a,b,\*</sup> Nader E. Abo-Dya,<sup>b,c</sup> Abdul Rashid Issahaku,<sup>d</sup> Clement Agoni,<sup>d</sup> Mahmoud E. S. Soliman,<sup>d</sup> Eatedal H. Abdel-Aal,<sup>b</sup> Zakaria K. Abdel-Samii,<sup>b</sup> and Tarek S. Ibrahim,<sup>b,e</sup>

<sup>a</sup> Department of Organic and Medicinal Chemistry, Faculty of Pharmacy, Fayoum University, Fayoum, 63514, Egypt.

<sup>b</sup> Department of Pharmaceutical Organic Chemistry, Faculty of Pharmacy, Zagazig University, Zagazig, 44519, Egypt.

<sup>c</sup> Department of Pharmaceutical Chemistry, Faculty of Pharmacy, University of Tabuk, Tabuk, 71491, Saudi Arabia.

<sup>d</sup> Molecular Bio-computation and Drug Design Laboratory, School of Health Sciences, University of KwaZulu-Natal, Westville Campus, Durban 4001, South Africa.

<sup>e</sup> Department of Pharmaceutical Chemistry, Faculty of Pharmacy, King Abdulaziz University, Jeddah, 21589, Saudi Arabia.

\*Corresponding author at: Department of Organic and Medicinal Chemistry, Faculty of Pharmacy, Fayoum University, Fayoum, 63514, Egypt.

e-mail:Aghanet2010@yahoo.com

#### Table of Contents

|                                                              |         |
|--------------------------------------------------------------|---------|
| 1. Computational methodology                                 | 1 – 2   |
| 2. Copies of <sup>1</sup> H and <sup>13</sup> C, HRMS spectr | 3 - 44  |
| 3. Pharmacological Screening                                 | 45 - 57 |

## **1. Computational methodology, Systems retrieval, preparation and molecular dynamics of the targets ability to bind to the glycine binding pocket of NMDA receptors .**

The X-ray crystal structure of the ligand binding domain (LBD) of NMDA receptor (PDB ID: K4FQ ) was retrieved from RSCB protein data bank and prepared for molecular docking [1–3] by removing all nonstandard residues including water using UCSF Chimera. [4] The missing residues were modelled using MODELLER. [5] Molegro Molecular Viewer [6] was then employed to resolve torsion discrepancies. The two dimensional structures of the synthesized analogues 3a-j were sketched using Marving Sketch software [7]. Universal Force Field incorporated into Avogadro 1.2.0 software [8] was then employed to optimise the energy on the 2D structures and to build their 3D structures. The molecular geometries of the compounds were optimised using the steepest descent algorithm and saved for molecular docking. The compounds were then docked into the glycine binding pocket of the binding domain of the NMDA receptor using Autodock vina [9]. The pharmacokinetics and physicochemical properties of the compounds were then evaluated using SwissADME.[10] The compound with the highest docking score, low toxicity, favourable ADMET properties and Sunifiram (3a) were then selected for molecular dynamics simulation. The simulation process was performed by employing the Graphical Processing Unit version of the Particle Mesh Ewald Molecular Dynamics (PMEMD) engine in AMBER18 package [11]. AMBER FF14SB protein forcefield and the integrated pdb4amber program were used to parameterise the protein and modify the protein respectively [12], while the selected compounds were parameterised using the ANTECHAMBER module [13] of the AMBER 18 package which as well created the atomic partial charges for the compounds. The tLeap module of the AMBER18 package was then used to combine the protein and ligands into their docked complexes, neutralise the complexes by adding Na<sup>+</sup> and Cl<sup>-</sup> counter ions and solvate the neutralised complexes with Transferable Intermolecular Potential with 3 Points (TIP3P) water box size of 8Å. An initial partial minimisation for 2500 steps employing 500 kcal/mol Å restraint potential was performed for the selected systems. This was followed by a full minimisation without energy restraint for 5000 steps. Heating of the systems was then performed gradually for 50 ps from 0 k to 300 k in NTP ensemble using Langevin thermostat [14] and a harmonic restraint of 5 kcal/mol Å<sup>2</sup>. Berendsen barostat was used to ensure constant atmospheric pressure at 1 bar while the systems were then equilibrated at 300k for 1000 ps without energy restraints. MD productions was then performed for 250ns with the SHAKE algorithm used to restrain all hydrogen bonds [15]. CPPTRAJ and

PTRAJ modules [16] integrated into the AMBER18 package were then used to analyse the trajectories and coordinates generated from the production. The data were then plotted and analysed using Origin data tool [17]. Structural visualisation was performed using Discovery Studio. [18]

### **Thermodynamics calculations.**

The differential binding affinity and stability of the selected compounds as well as the free binding energy of the complexes were investigated. The Molecular Mechanics/Poisson-Boltzmann Area method [19] was applied for the investigation due to its efficiency and widely reported reliability [20].

The binding free energy of this approach is depicted as follows:

$$\Delta G_{\text{bind}} = G_{\text{complex}} - G_{\text{receptor}} - G_{\text{ligand}} \quad (1)$$

$$\Delta G_{\text{bind}} = E_{\text{gas}} + G_{\text{sol}} - T\Delta S \quad (2)$$

Where  $\Delta G_{\text{bind}}$  is taken to be the sum of the gas phase and solvation energy terms less the entropy ( $T\Delta S$ ) term

$$E_{\text{gas}} = E_{\text{int}} + E_{\text{vdw}} + E_{\text{ele}} \quad (3)$$

Where  $E_{\text{gas}}$  is the total of the AMBER force field internal energy terms.  $E_{\text{int}}$  (bond, angle and torsion), the covalent van der Waals ( $E_{\text{vdw}}$ ) and the non-bonded electrostatic energy component ( $E_{\text{ele}}$ ). The solvation energy is denoted by the equation:

$$G_{\text{sol}} = G_{\text{PB}} + G_{\text{non-polar}} \quad (4)$$

$$G_{\text{non-polar}} = \gamma \text{SASA} + b \quad (5)$$

The polar solvation contribution is denoted as  $G_{\text{PB}}$  and  $G_{\text{non-polar}}$  represents the non-polar contribution energy and is computed from the solvent assessable surface area (SASA). Which is obtained by the use of 1.4Å water probe radius. Per-residue decomposition analyses were also performed to estimate individual energy contribution of the residues of the substrate pocket to the affinity and stabilisation of the compounds.

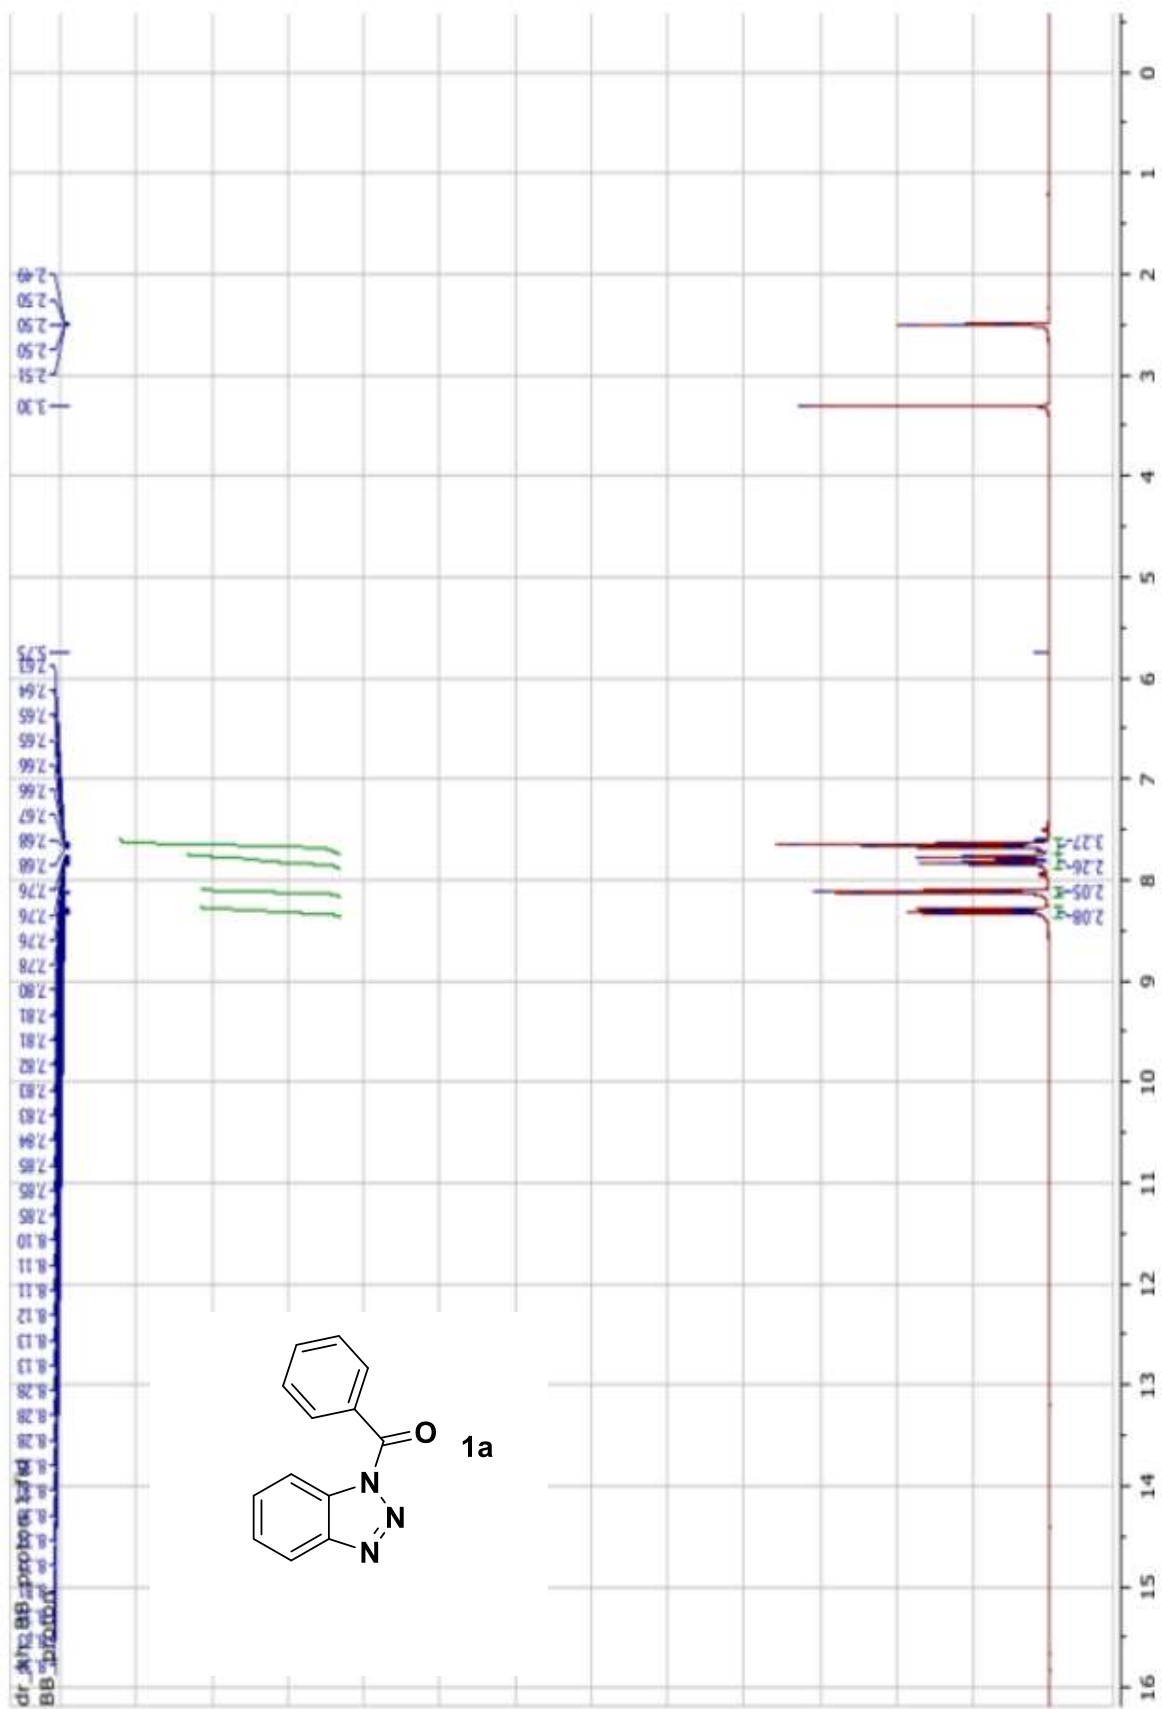

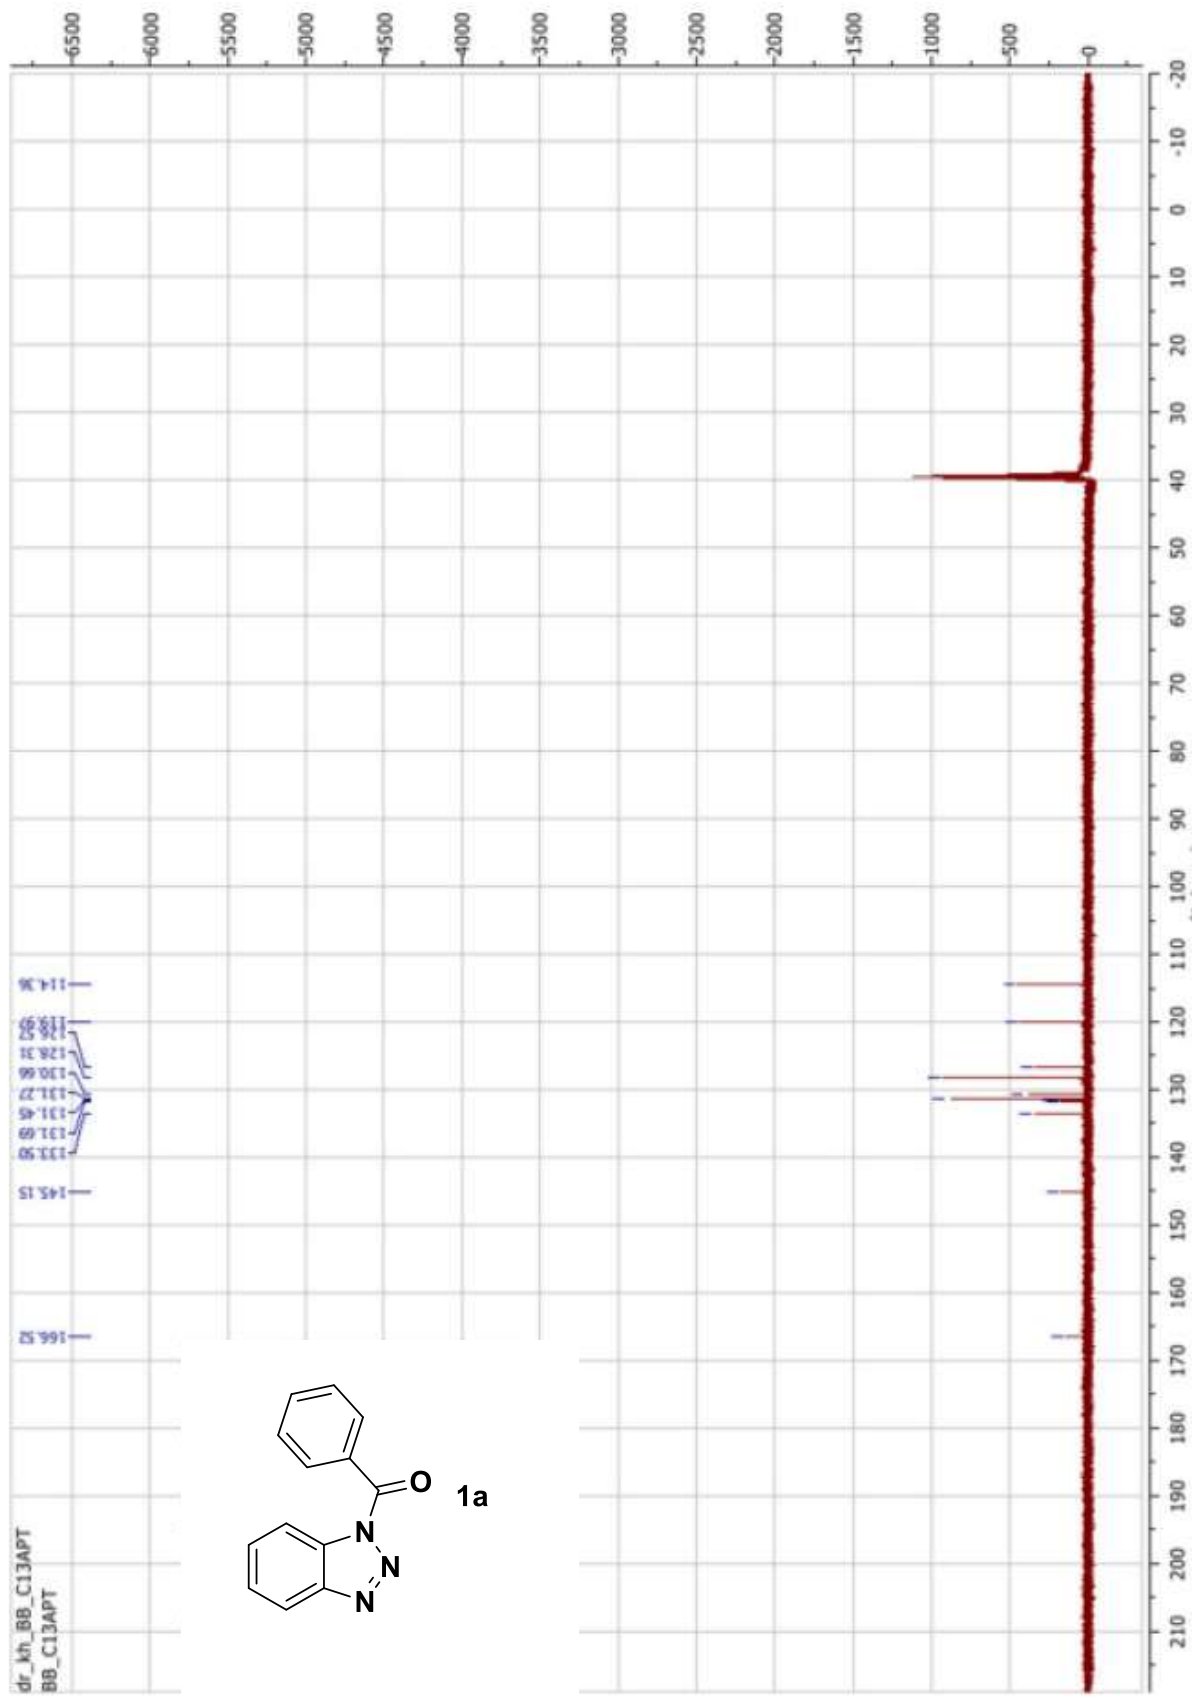

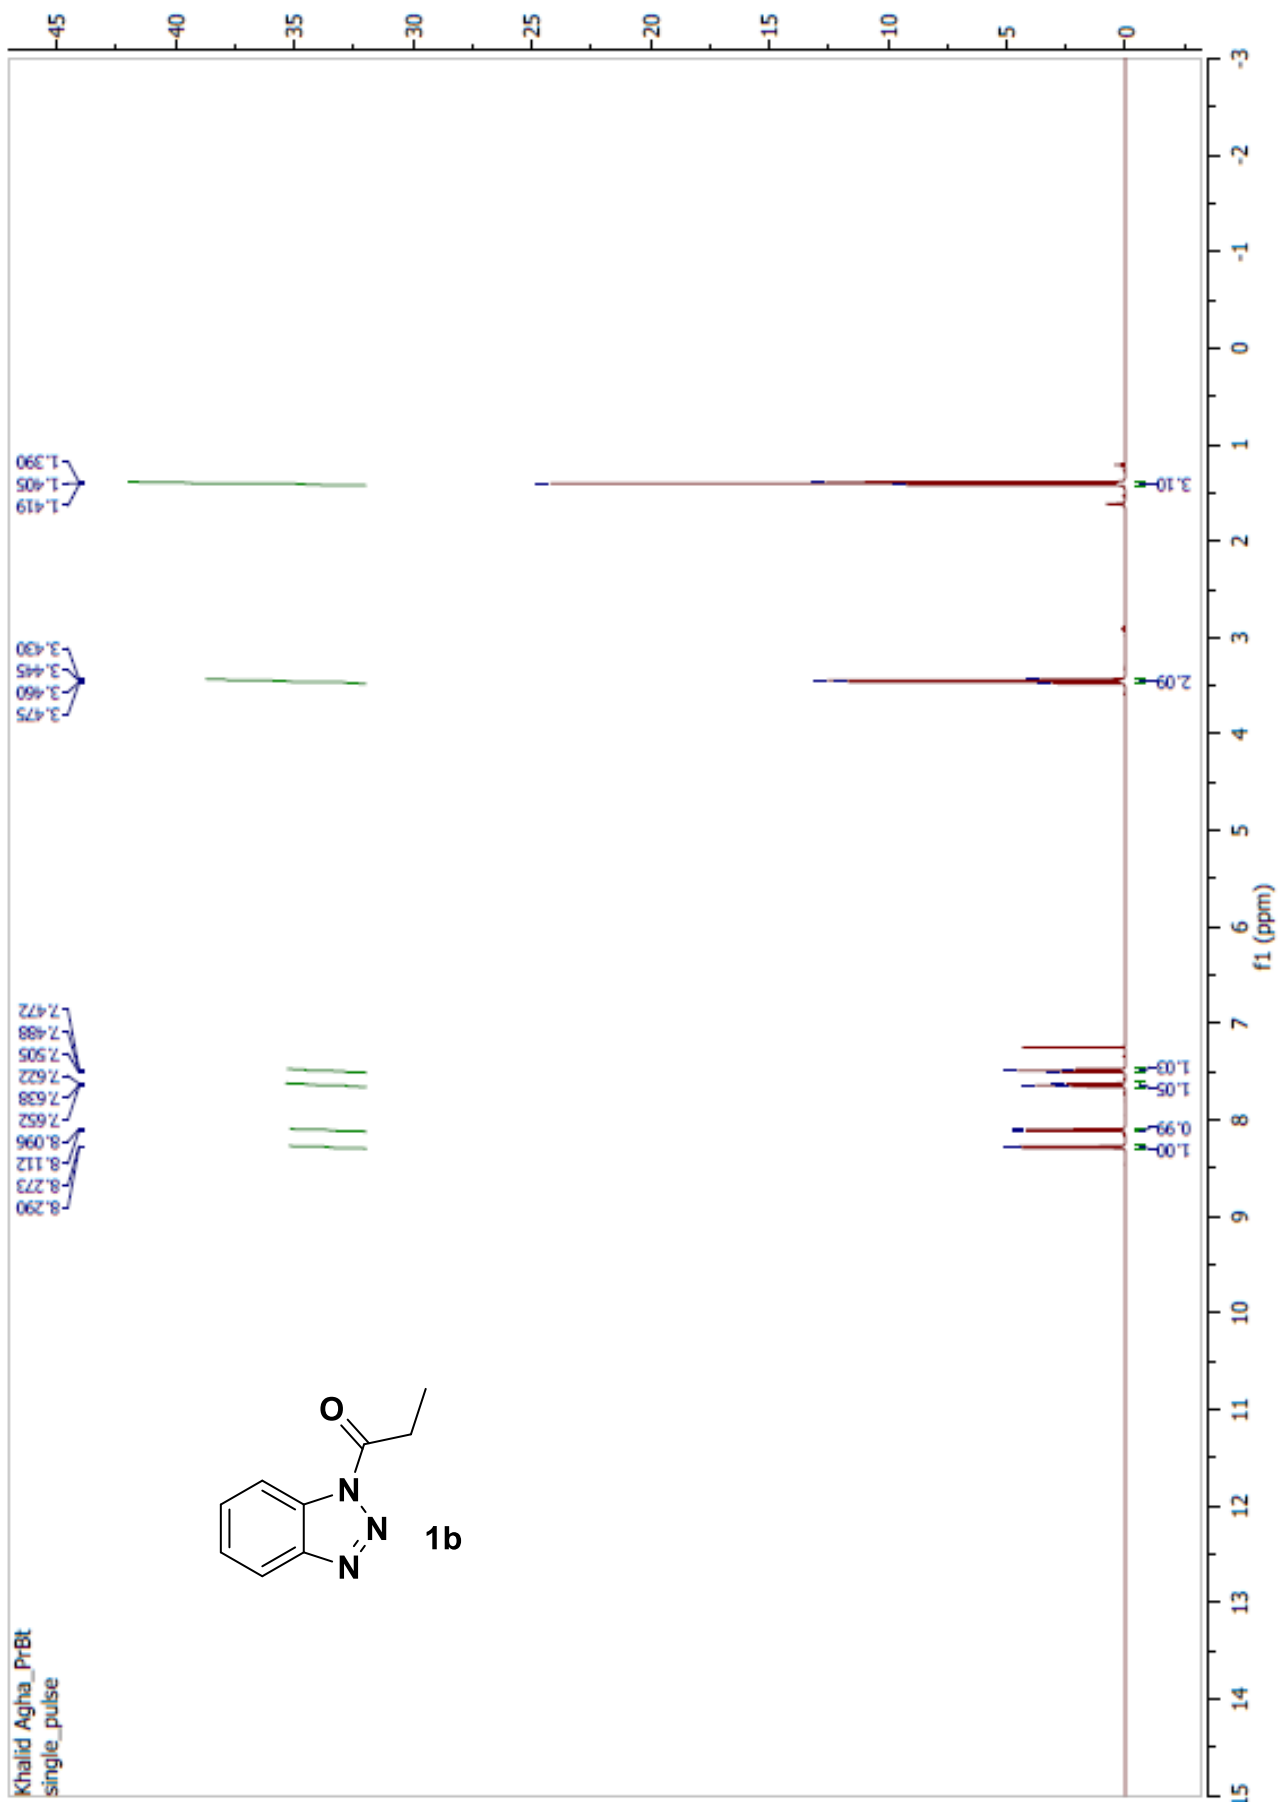



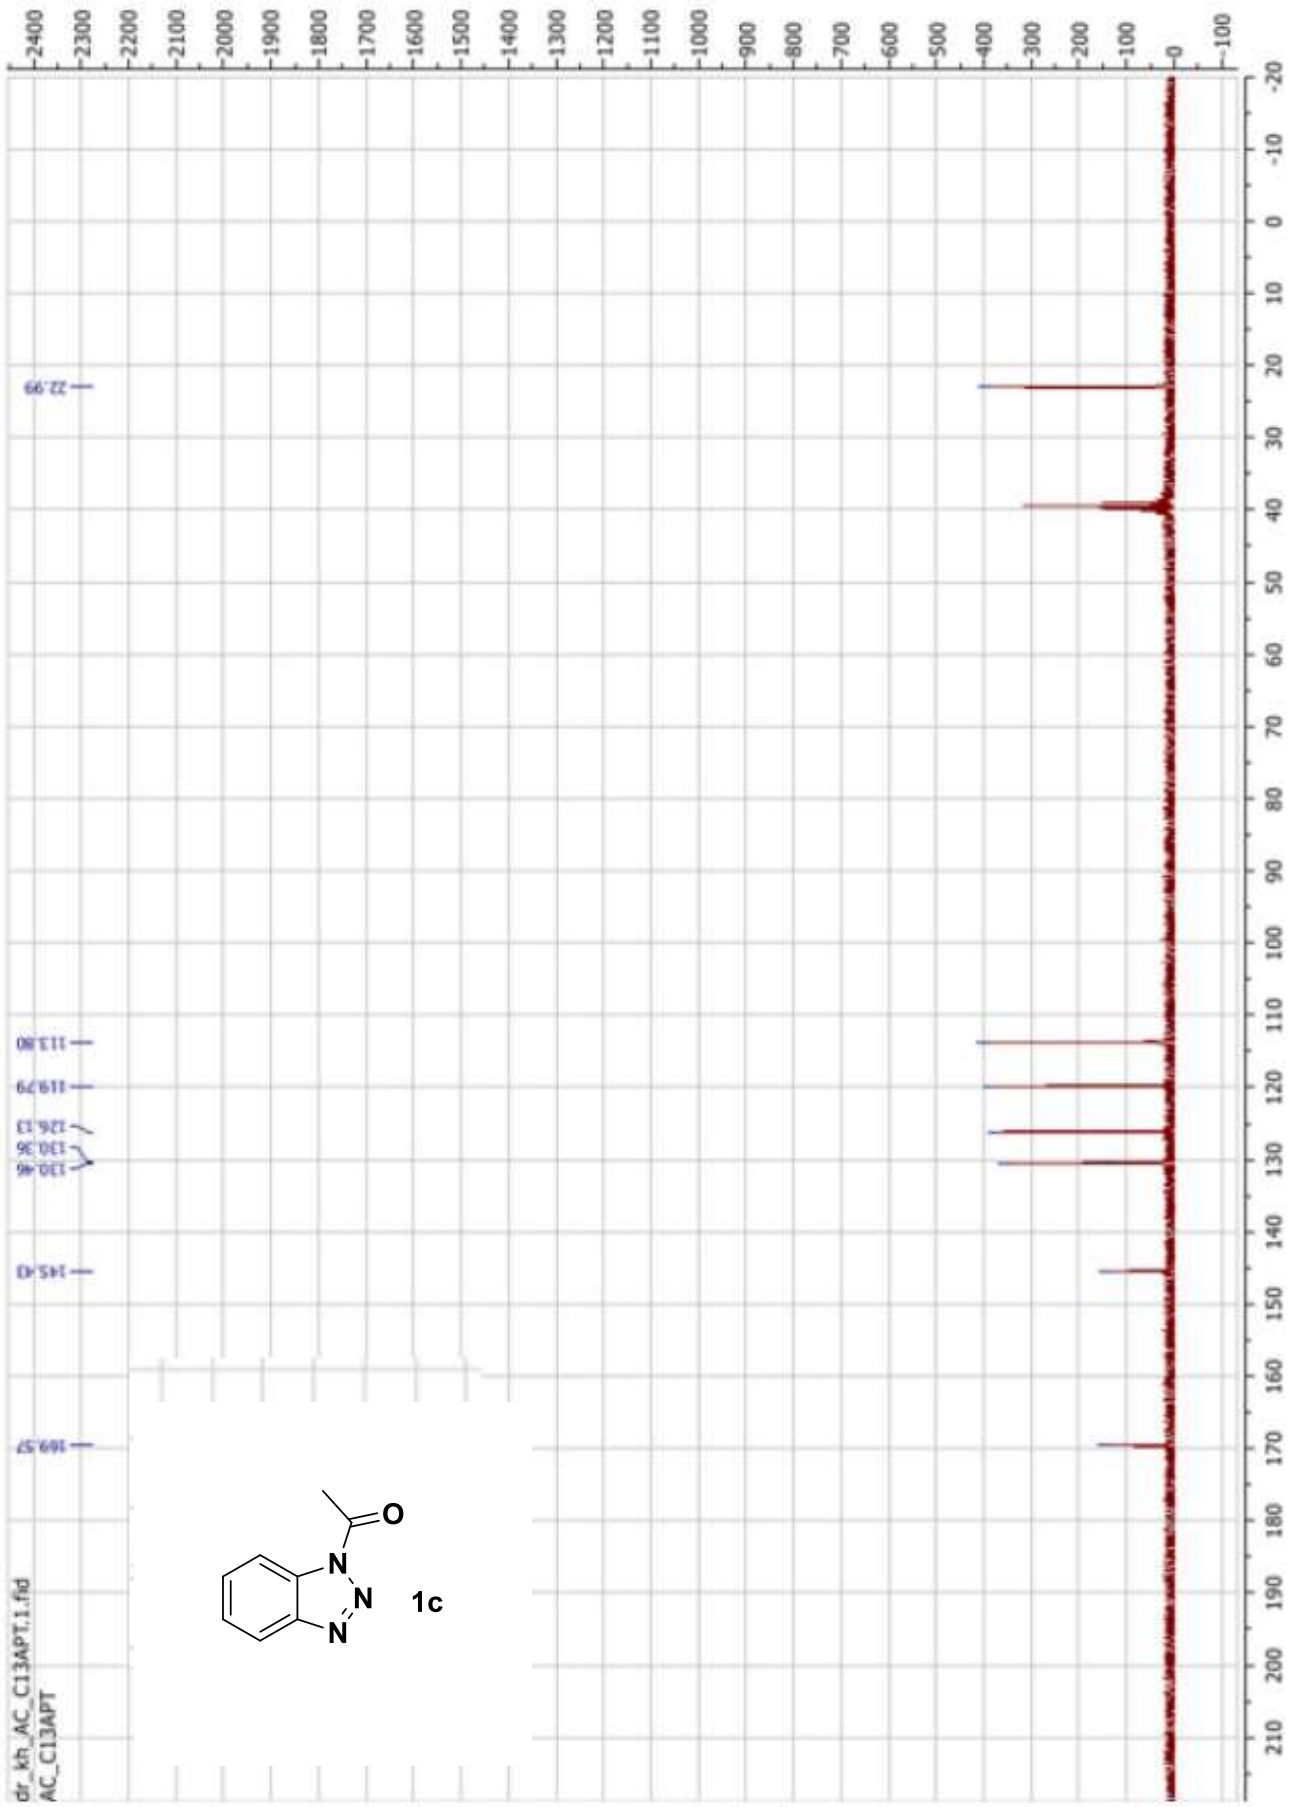



Khaled Agha-BAB-proton-ES  
Khaled Agha-BAB-proton-ES

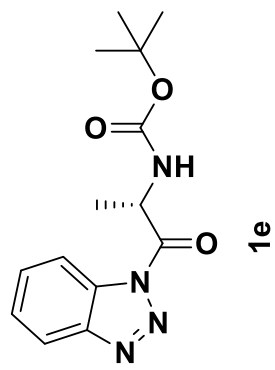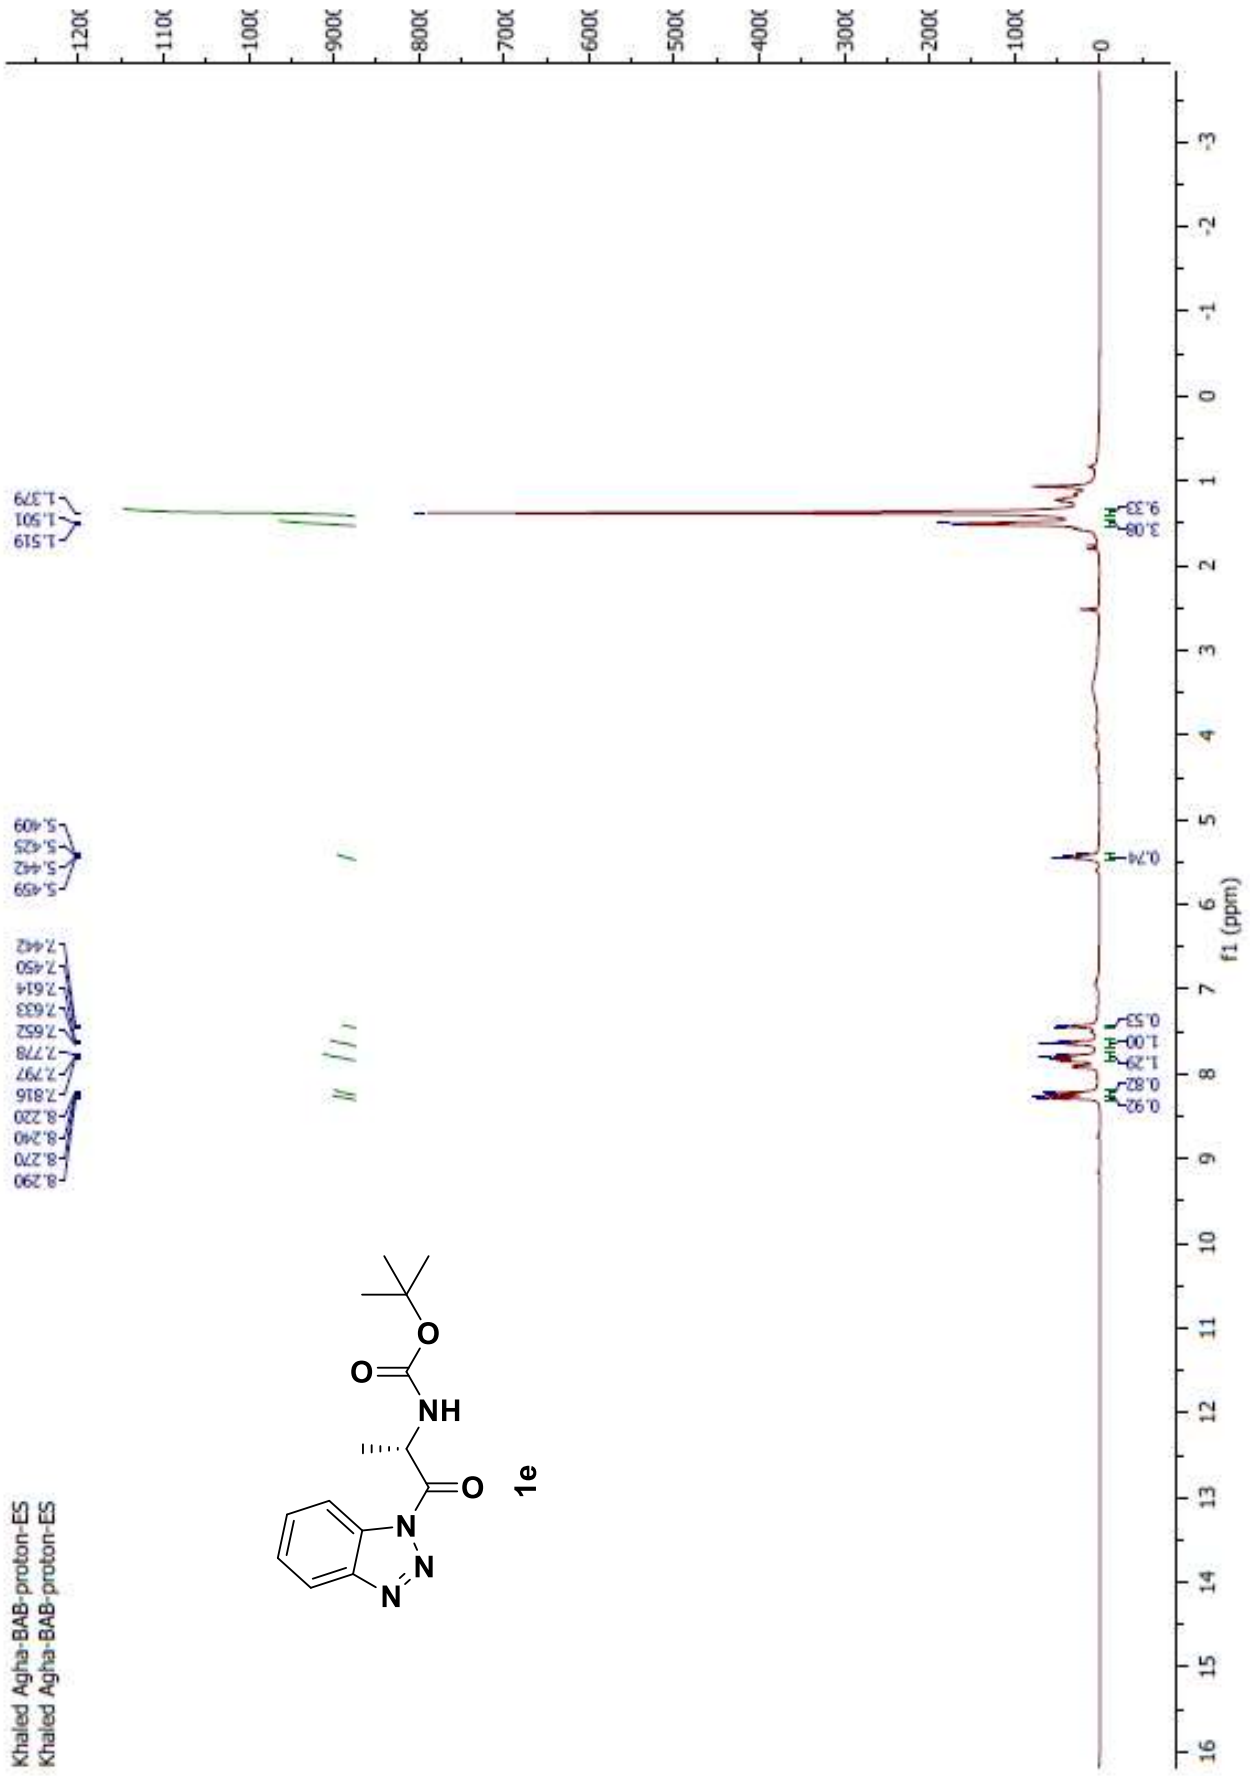

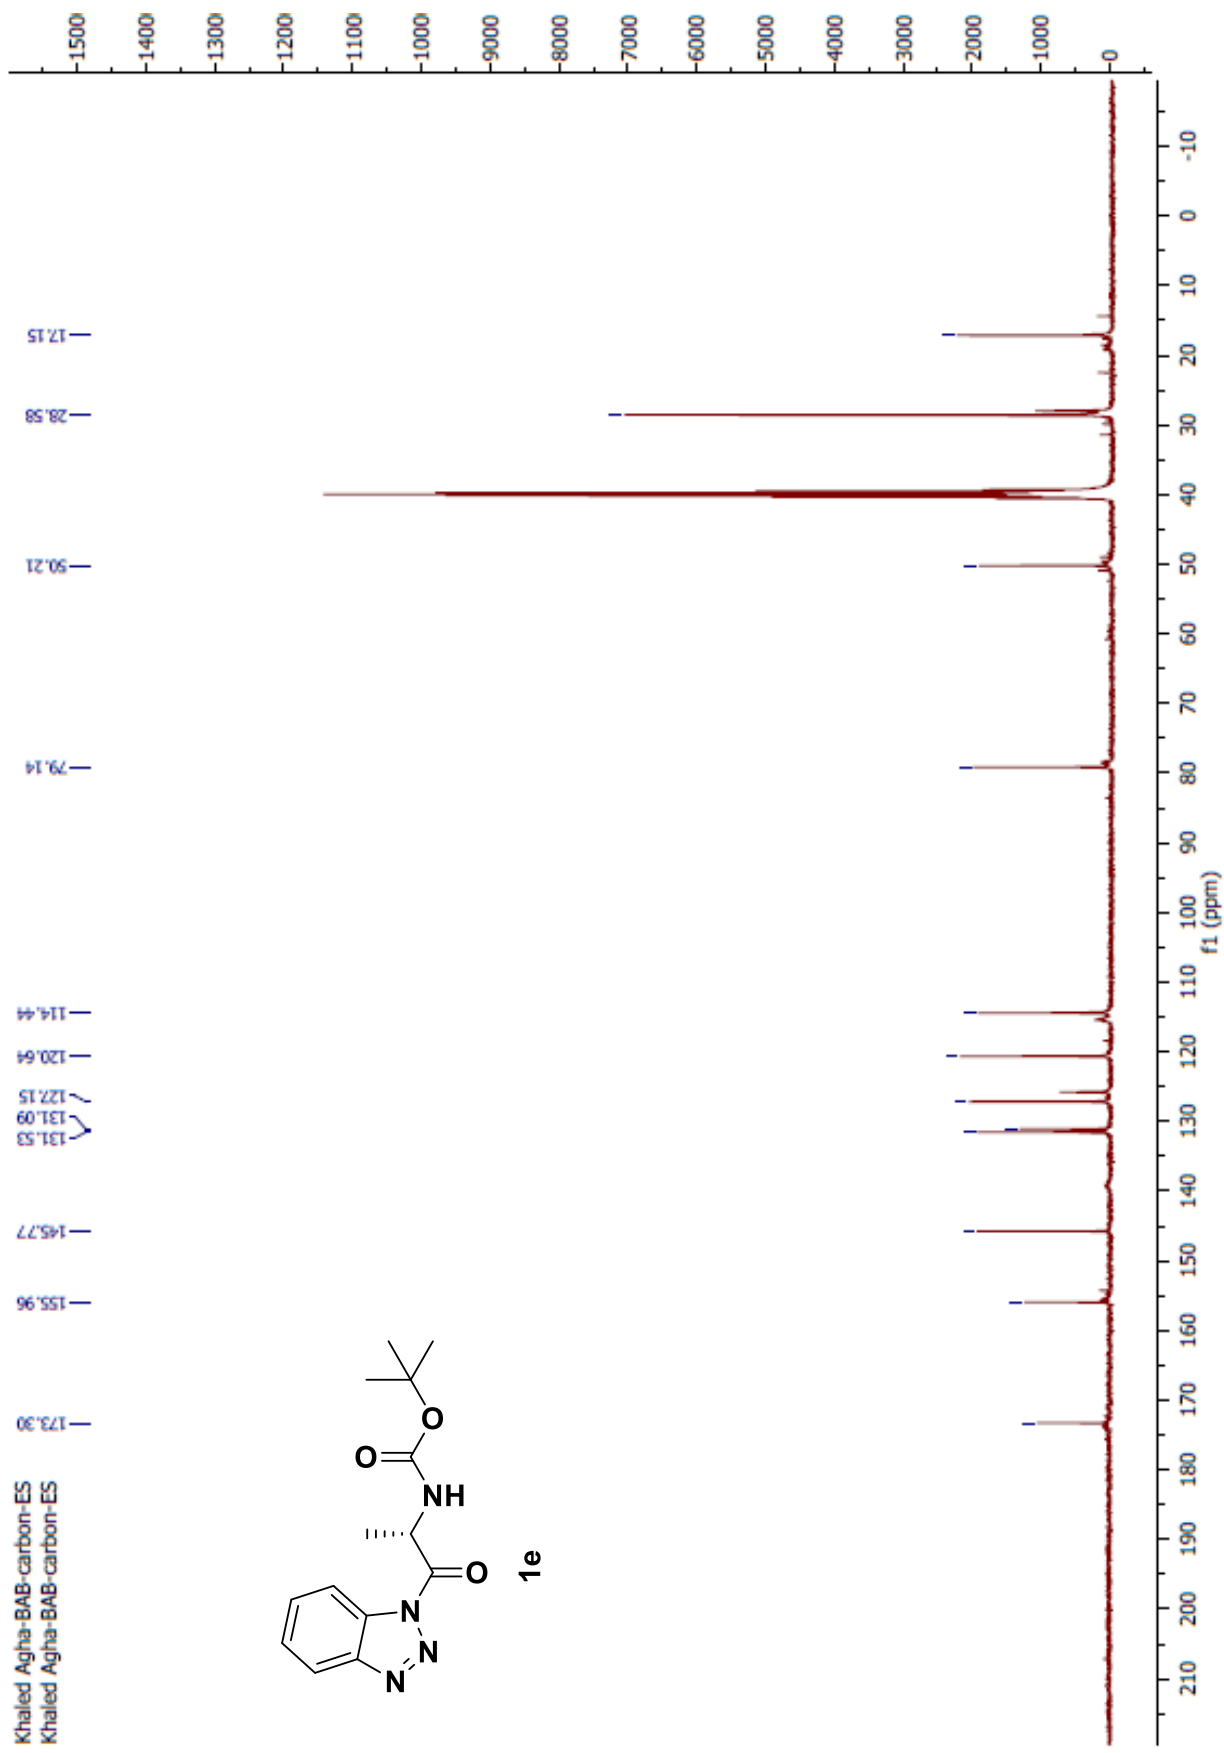

Khalid agha BOMe -M hnmr  
Khalid agha BOMe -M hnmr

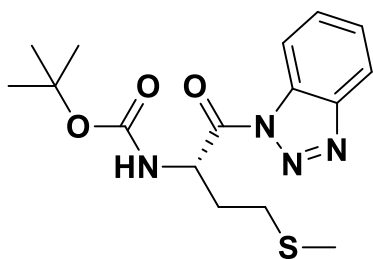

19

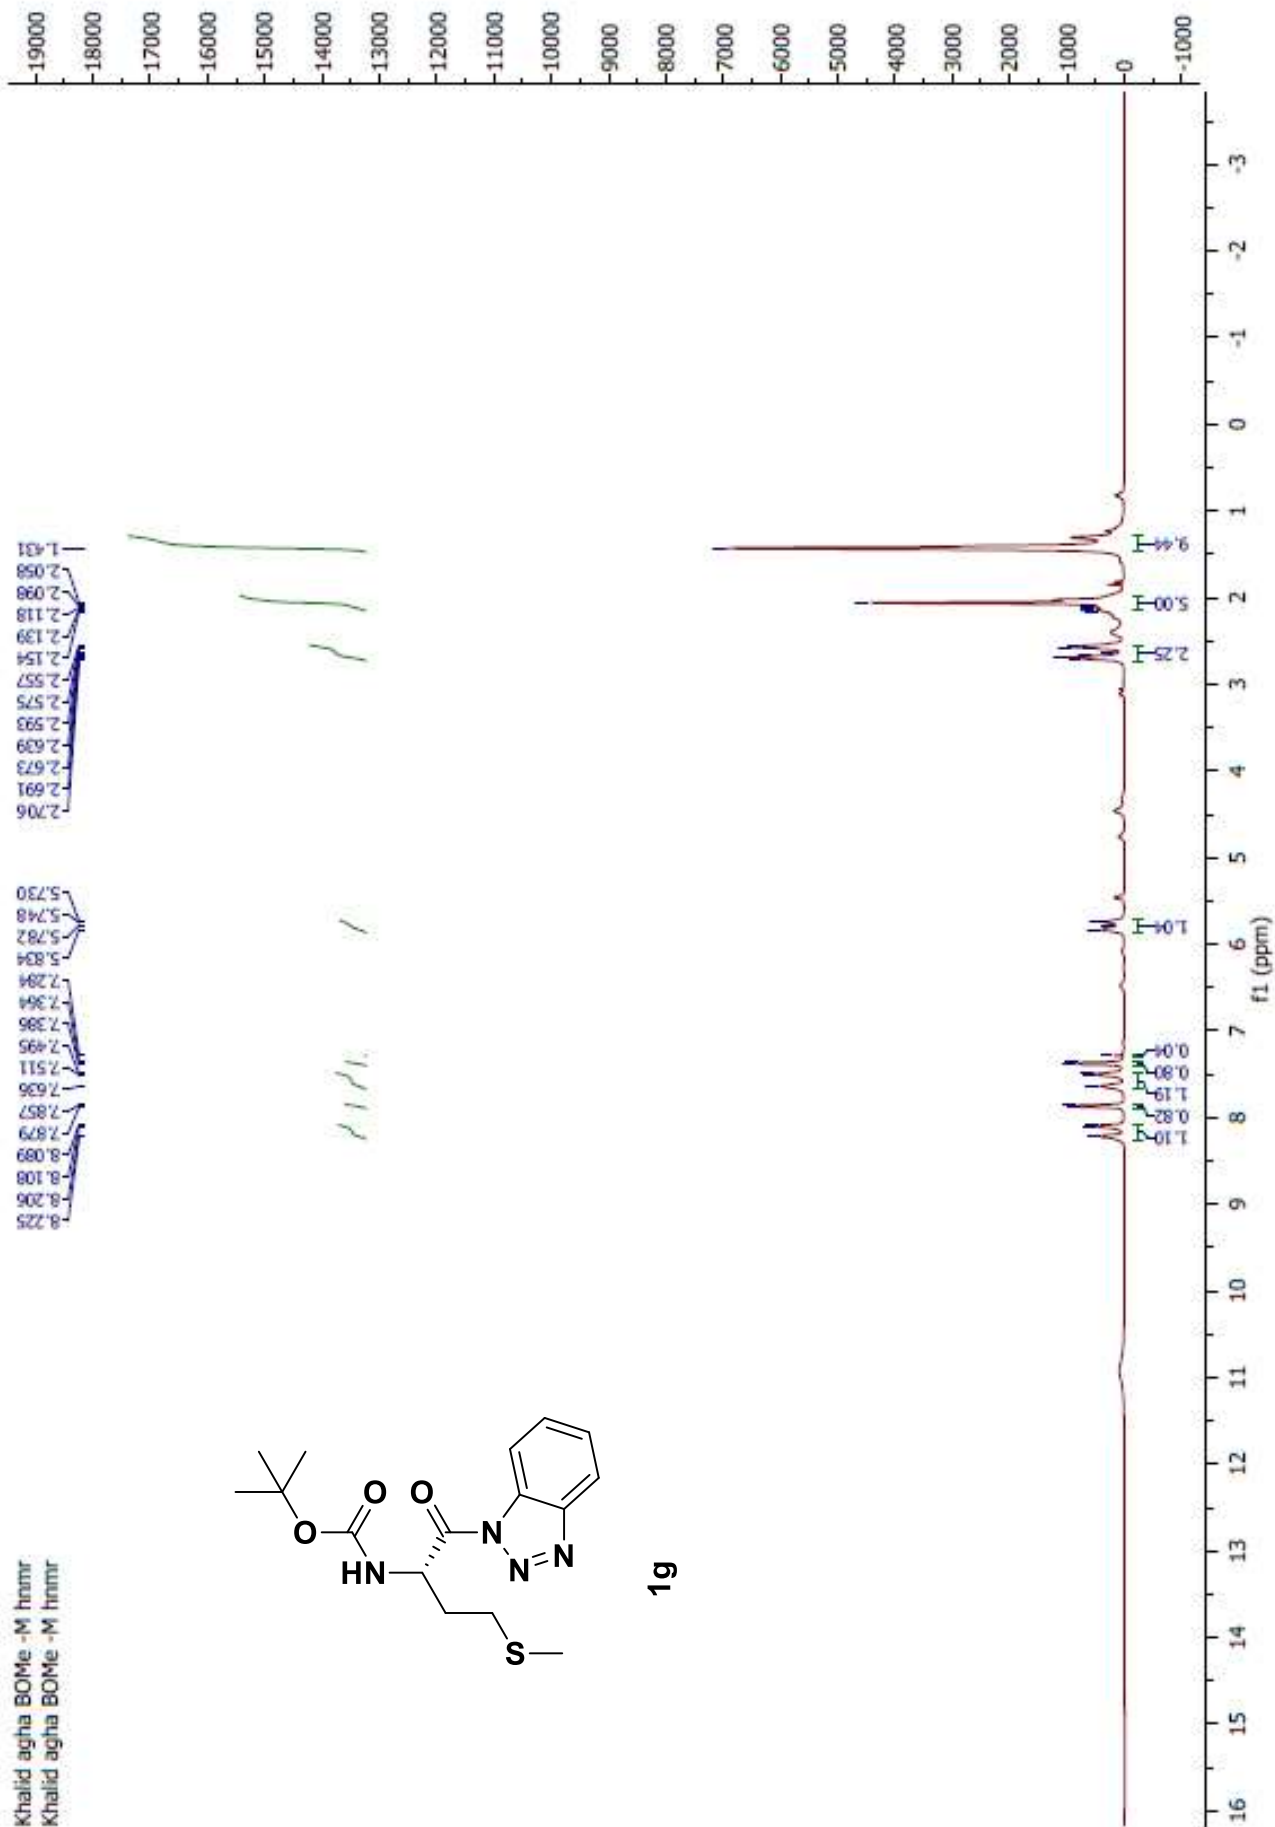

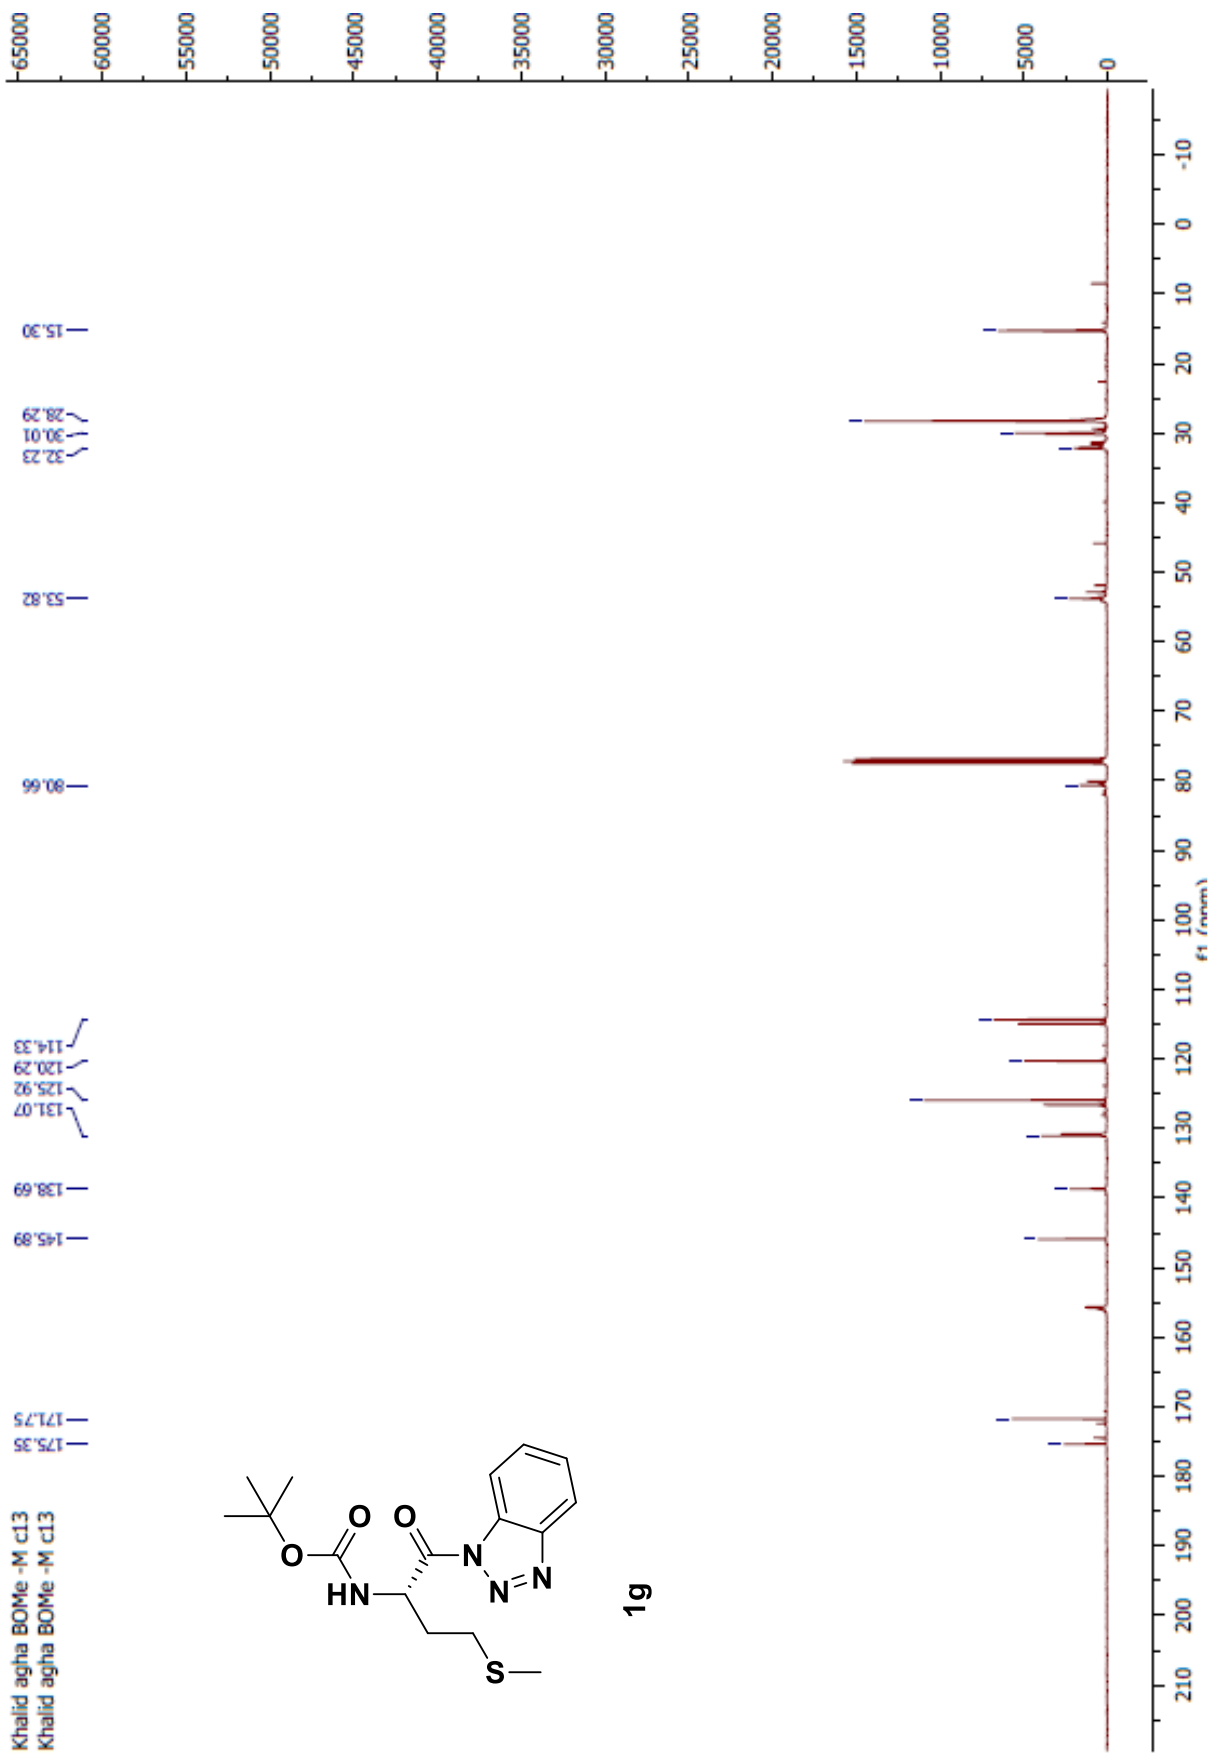

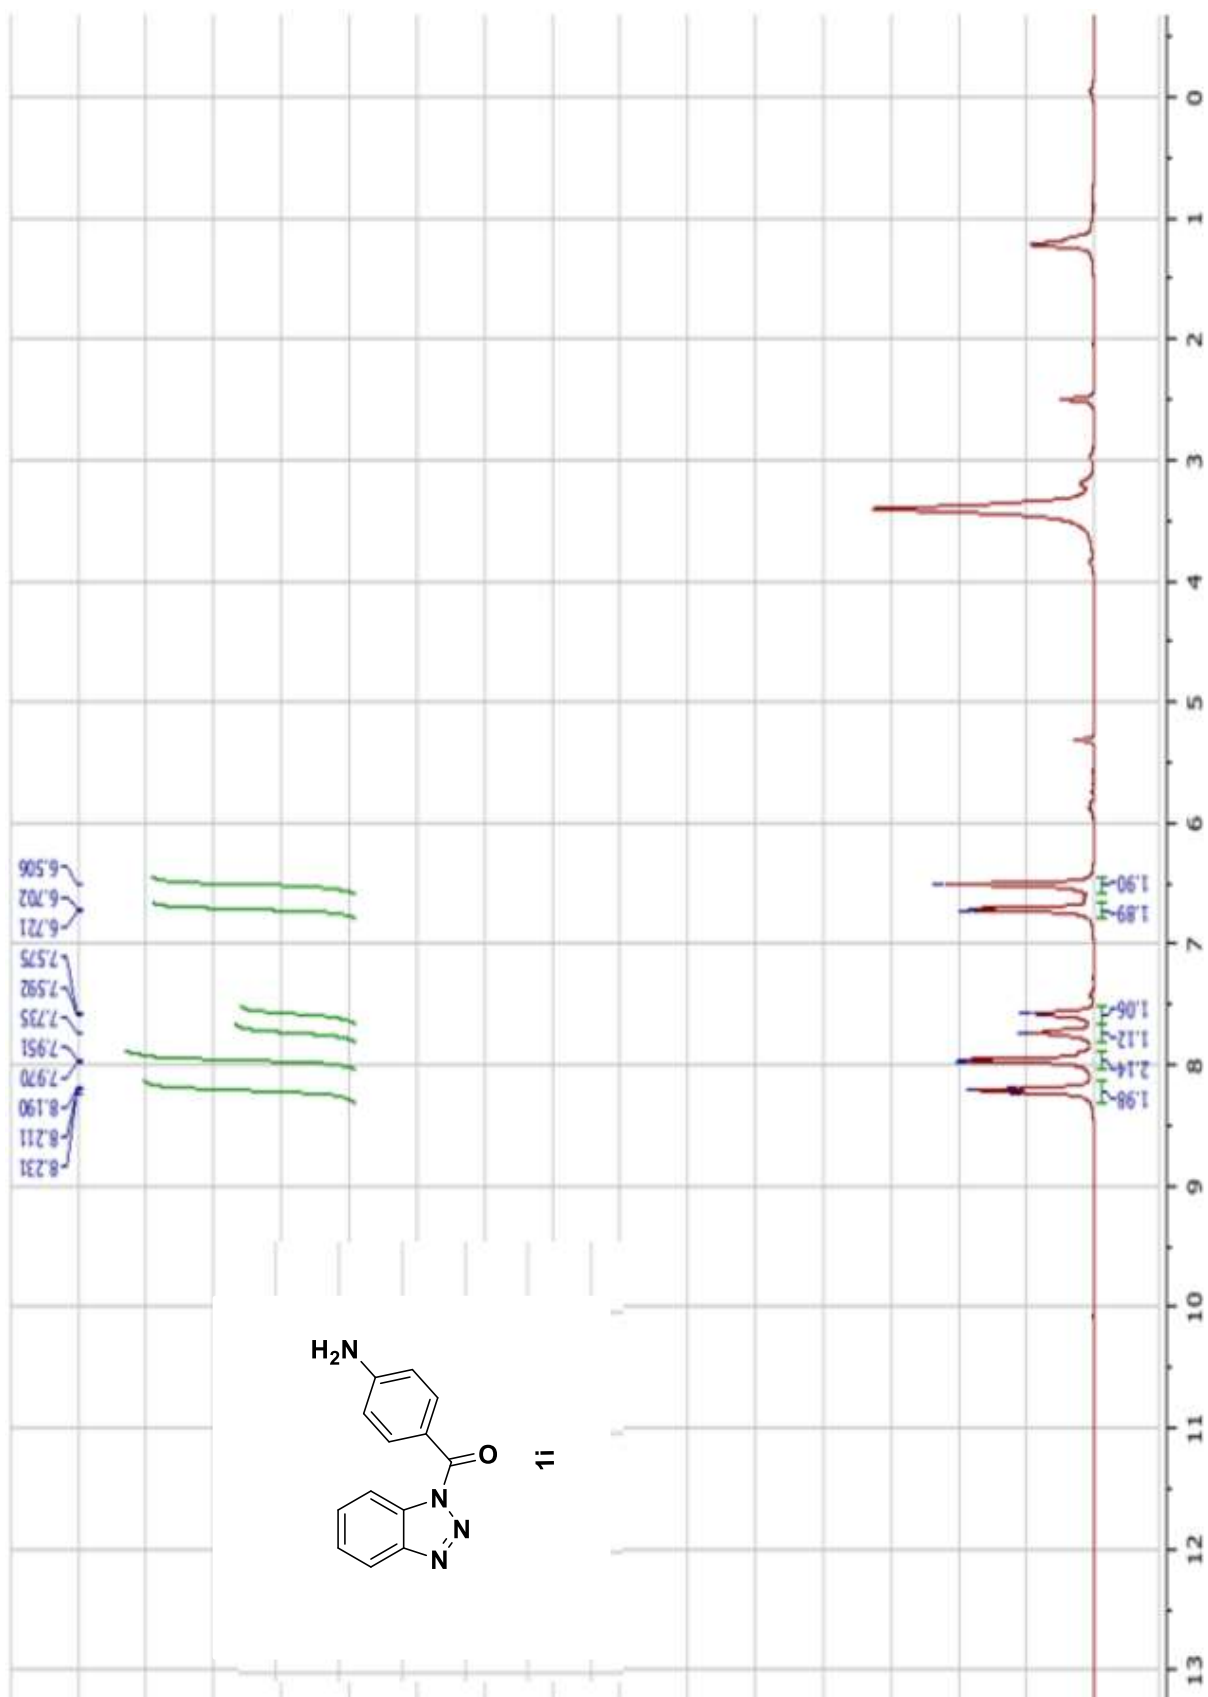

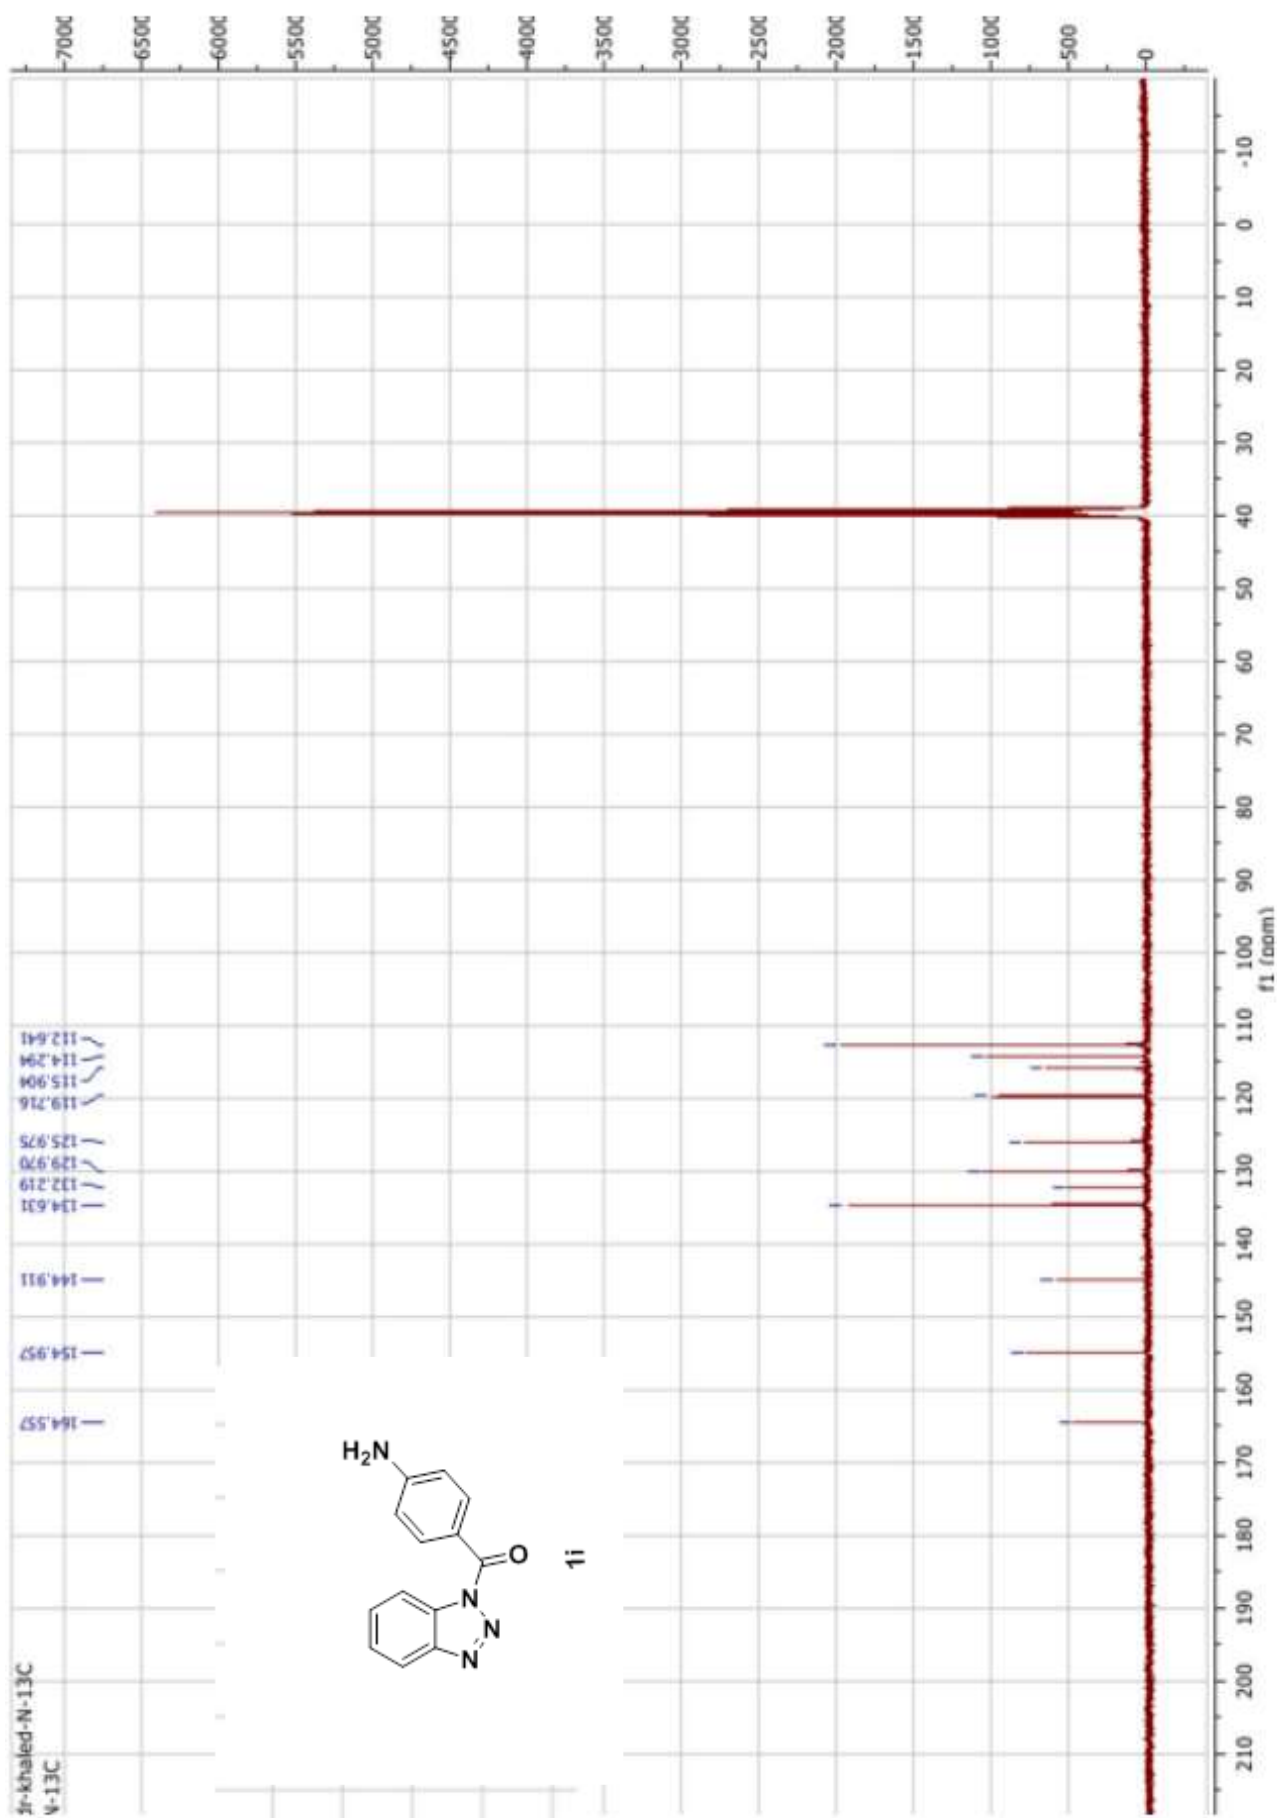

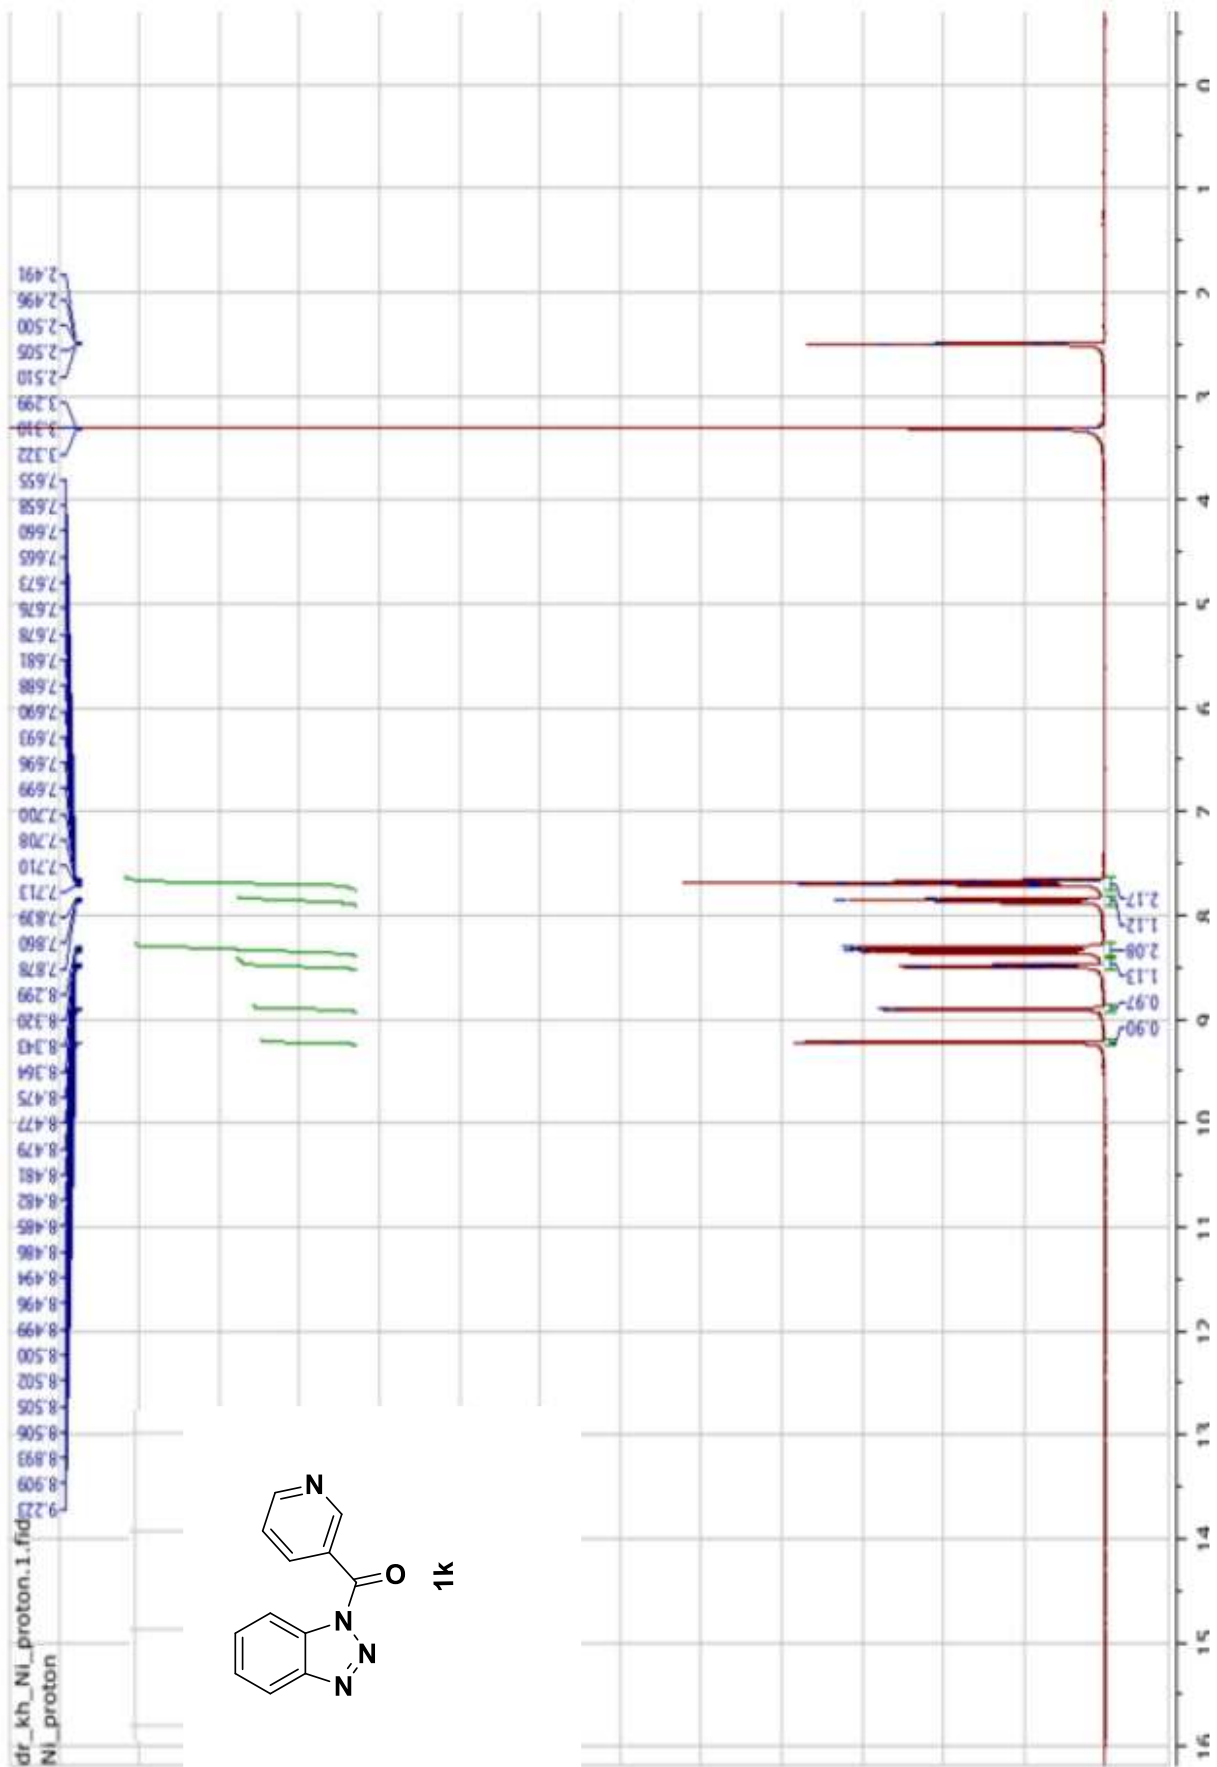

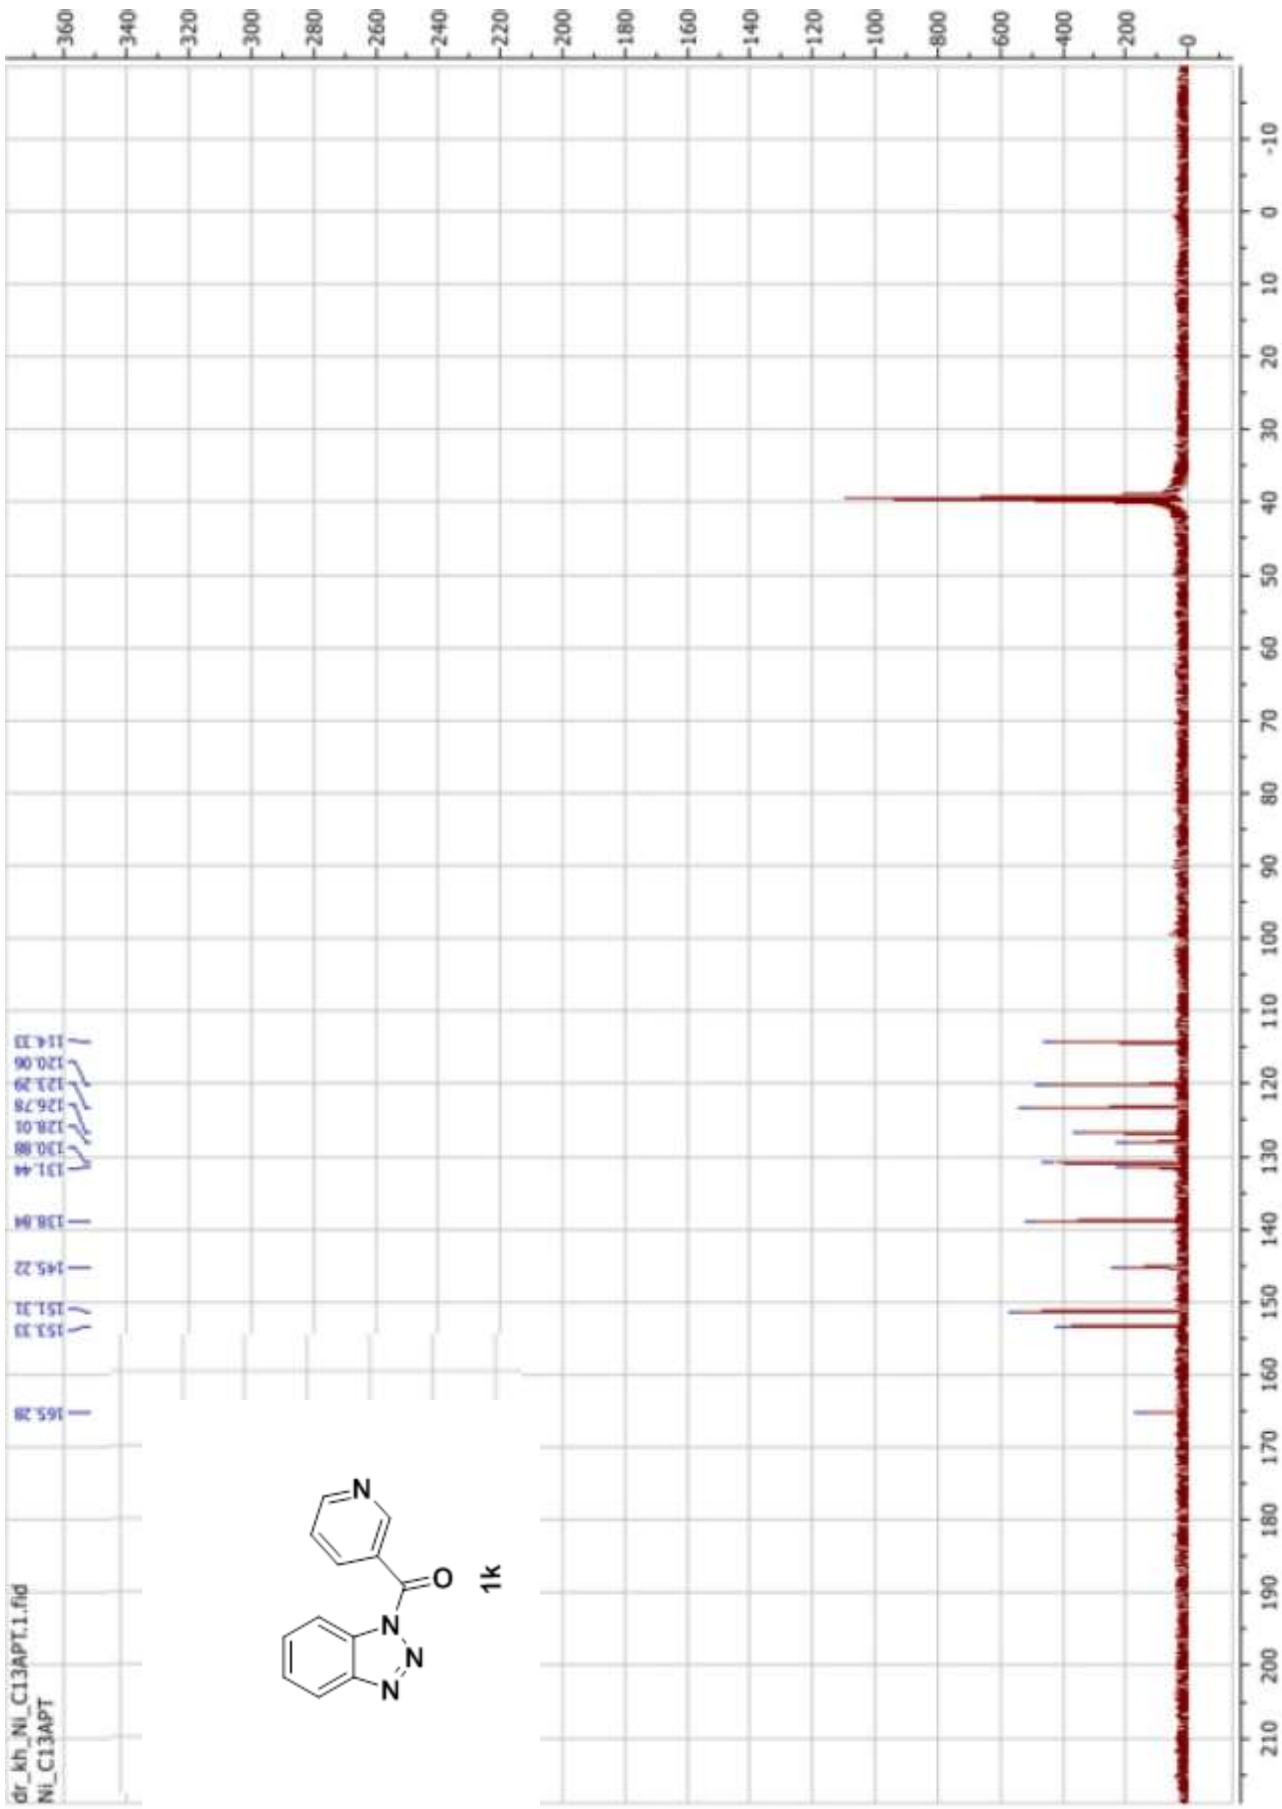



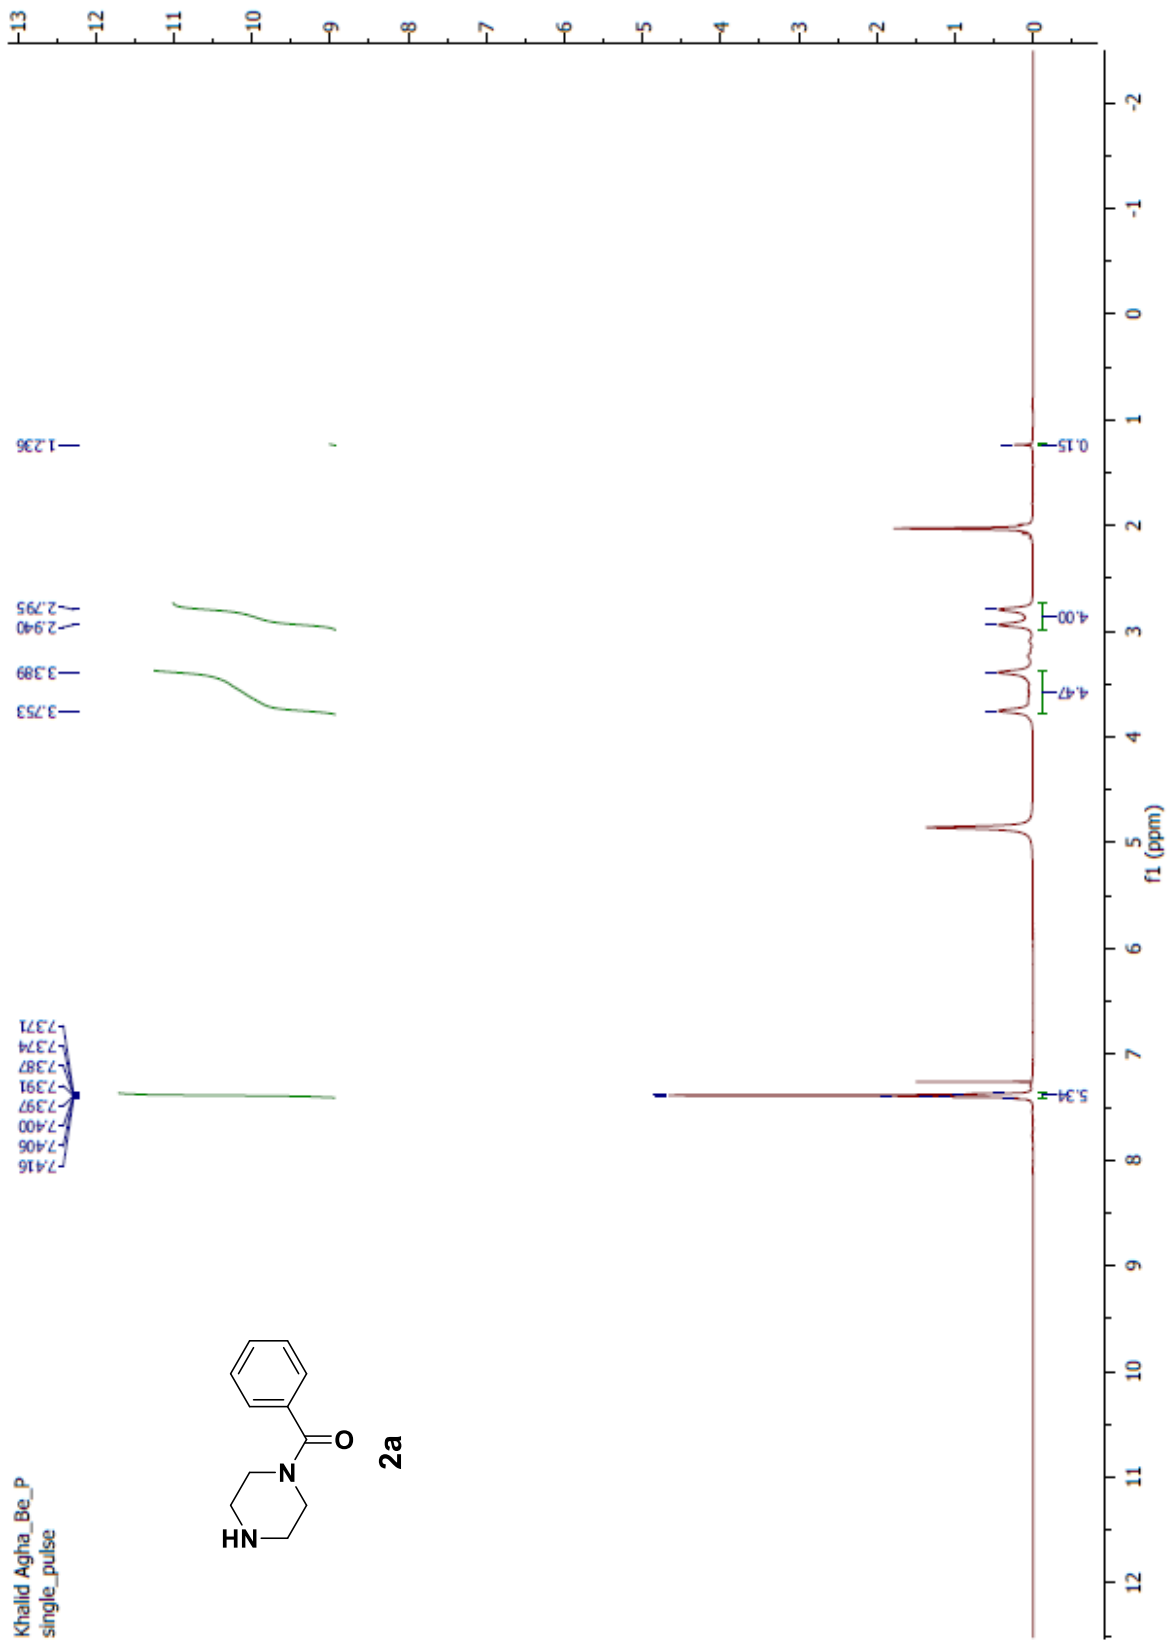

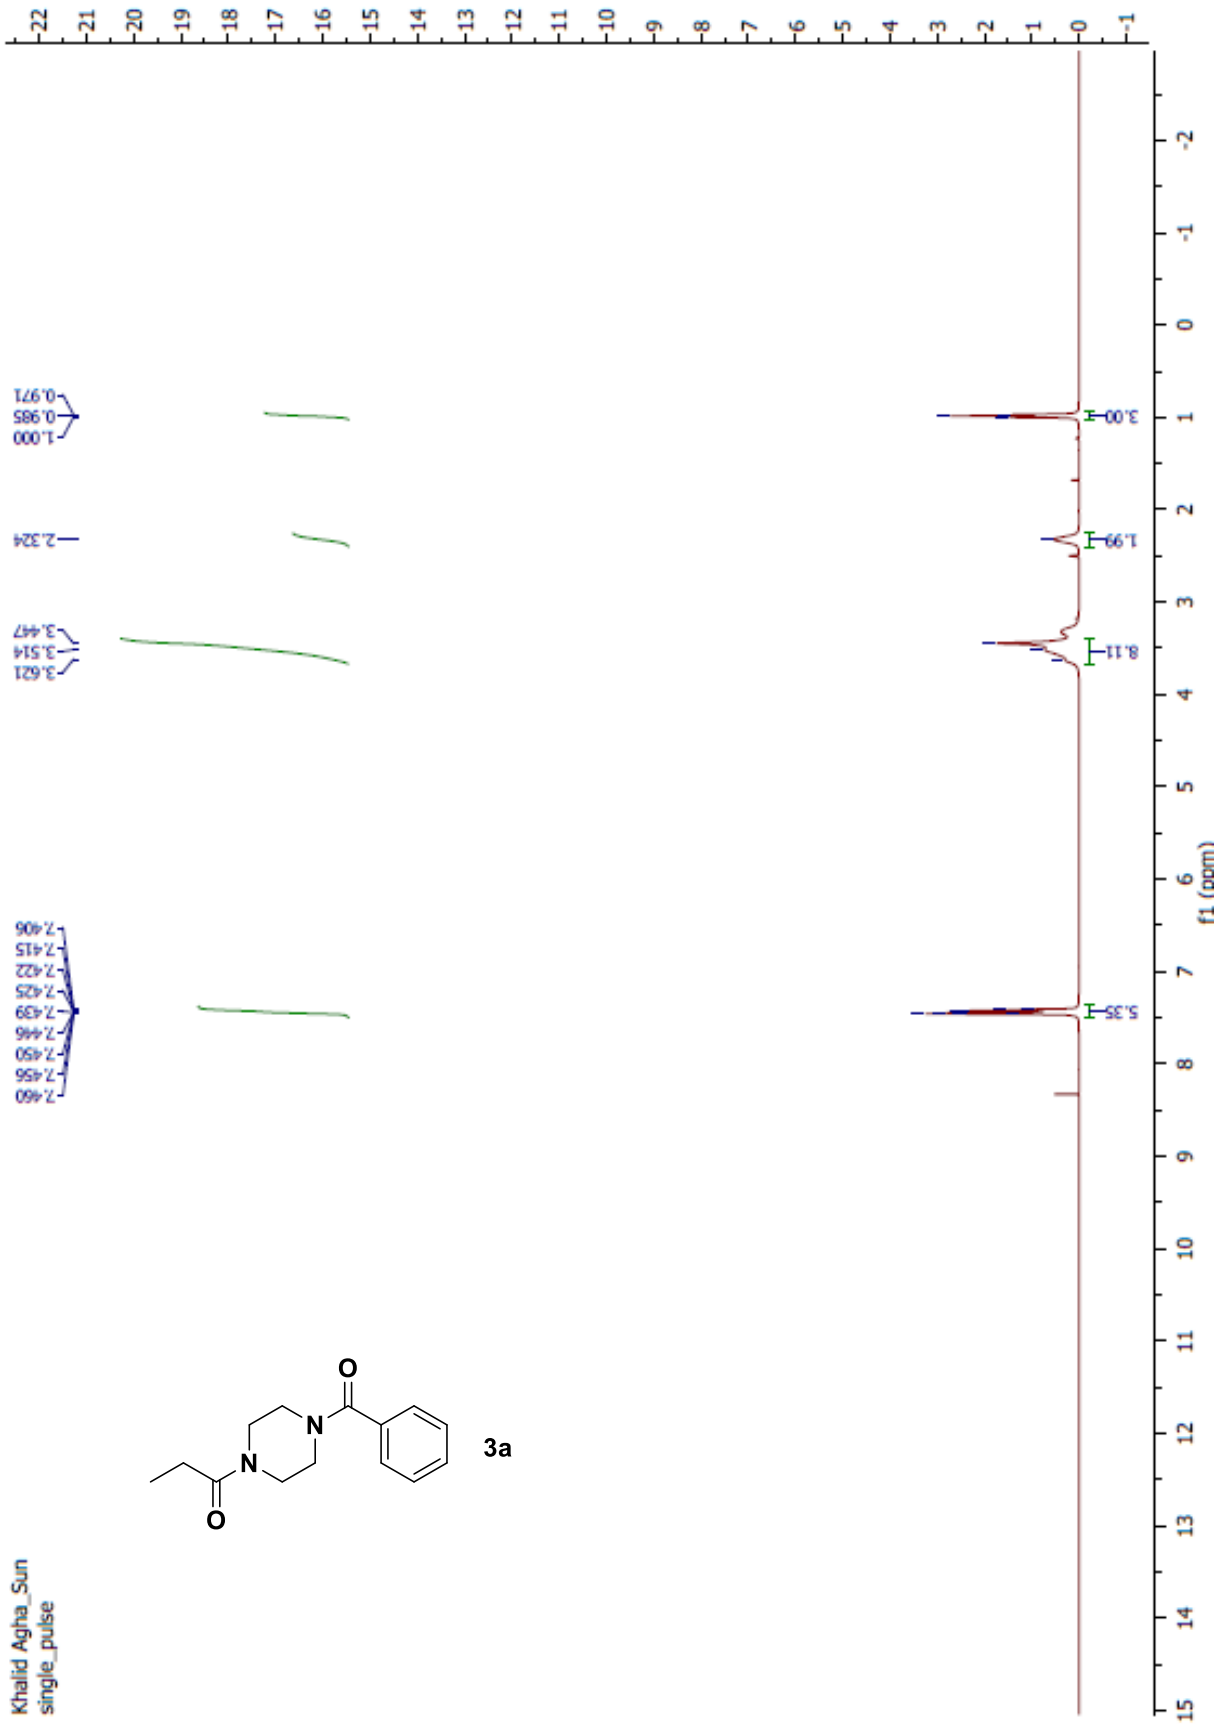

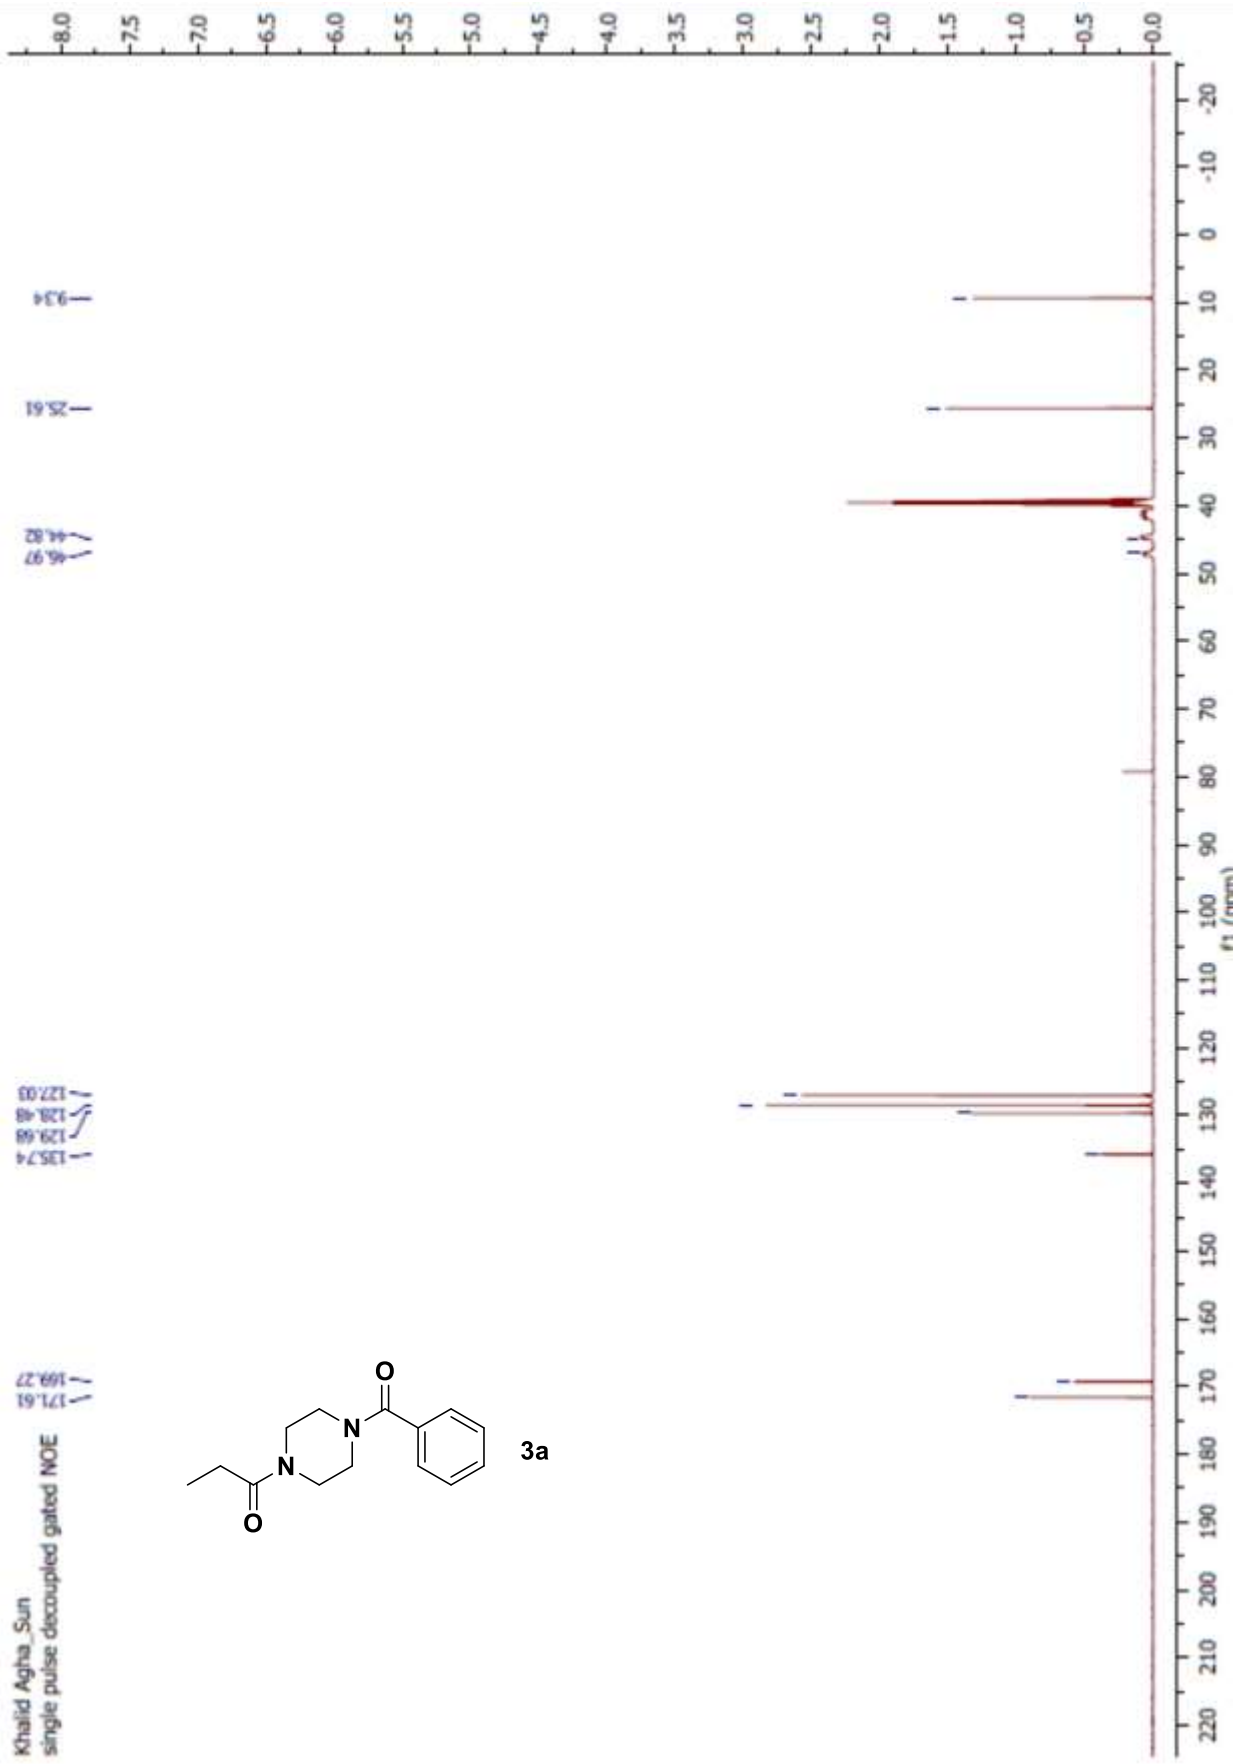

Khalid AbdElHay Agha-APB-DMSO-Hnmr-A  
Khalid AbdElHay Agha-APB-DMSO-Hnmr-A

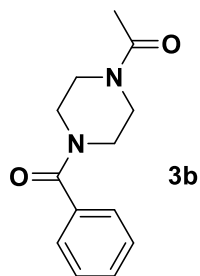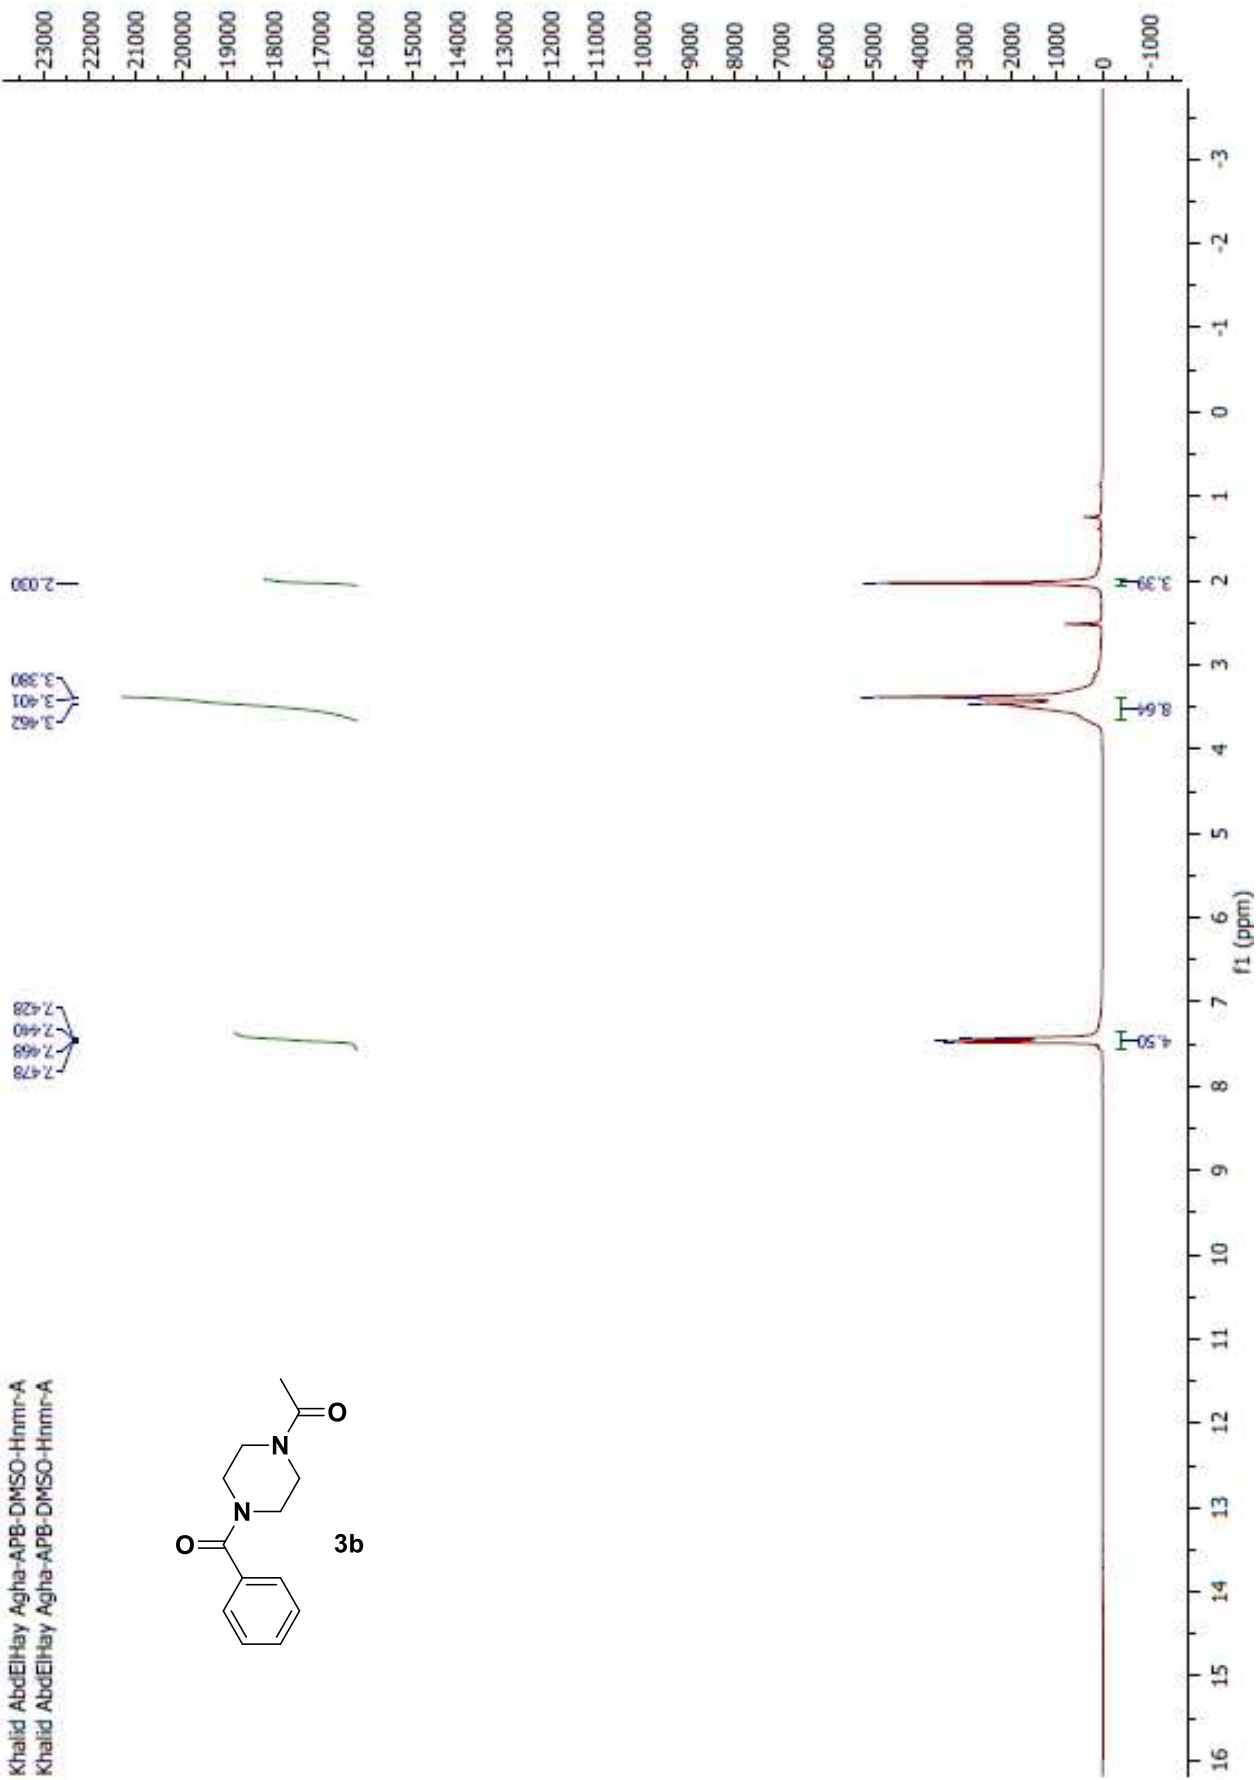

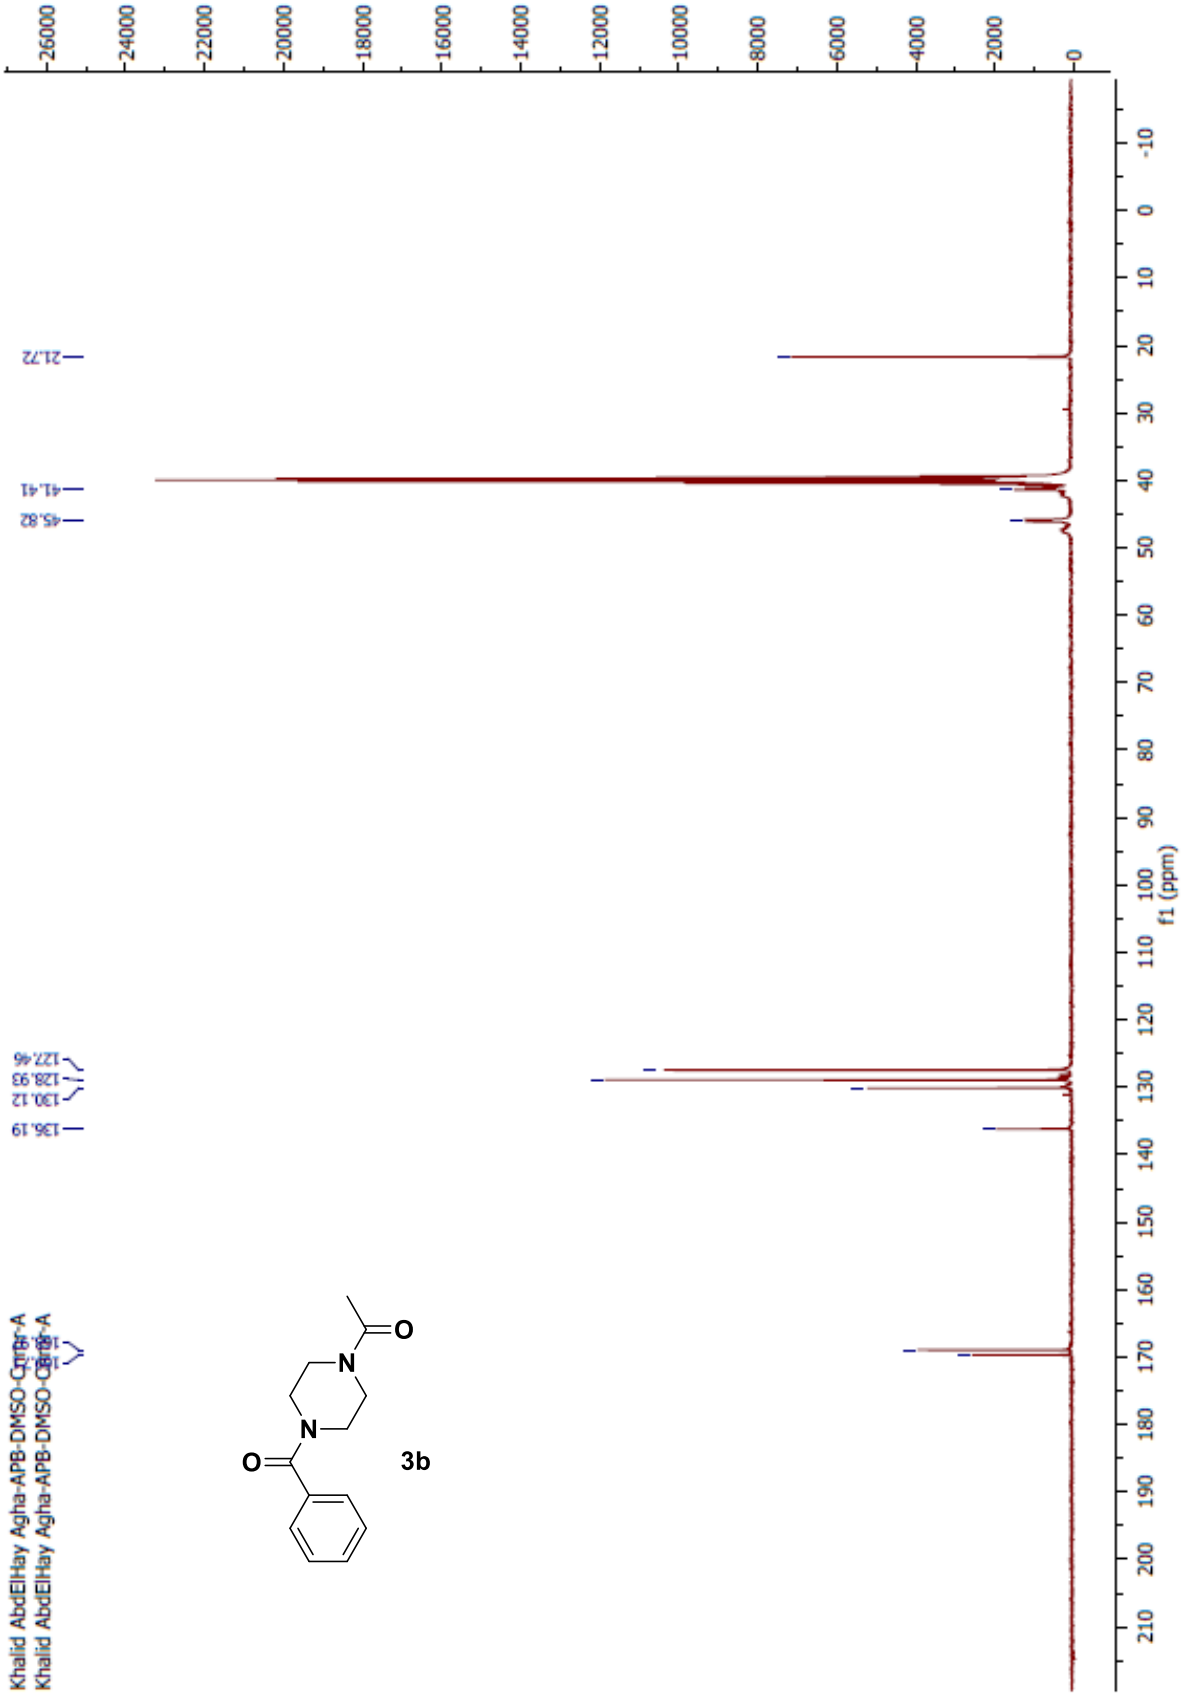

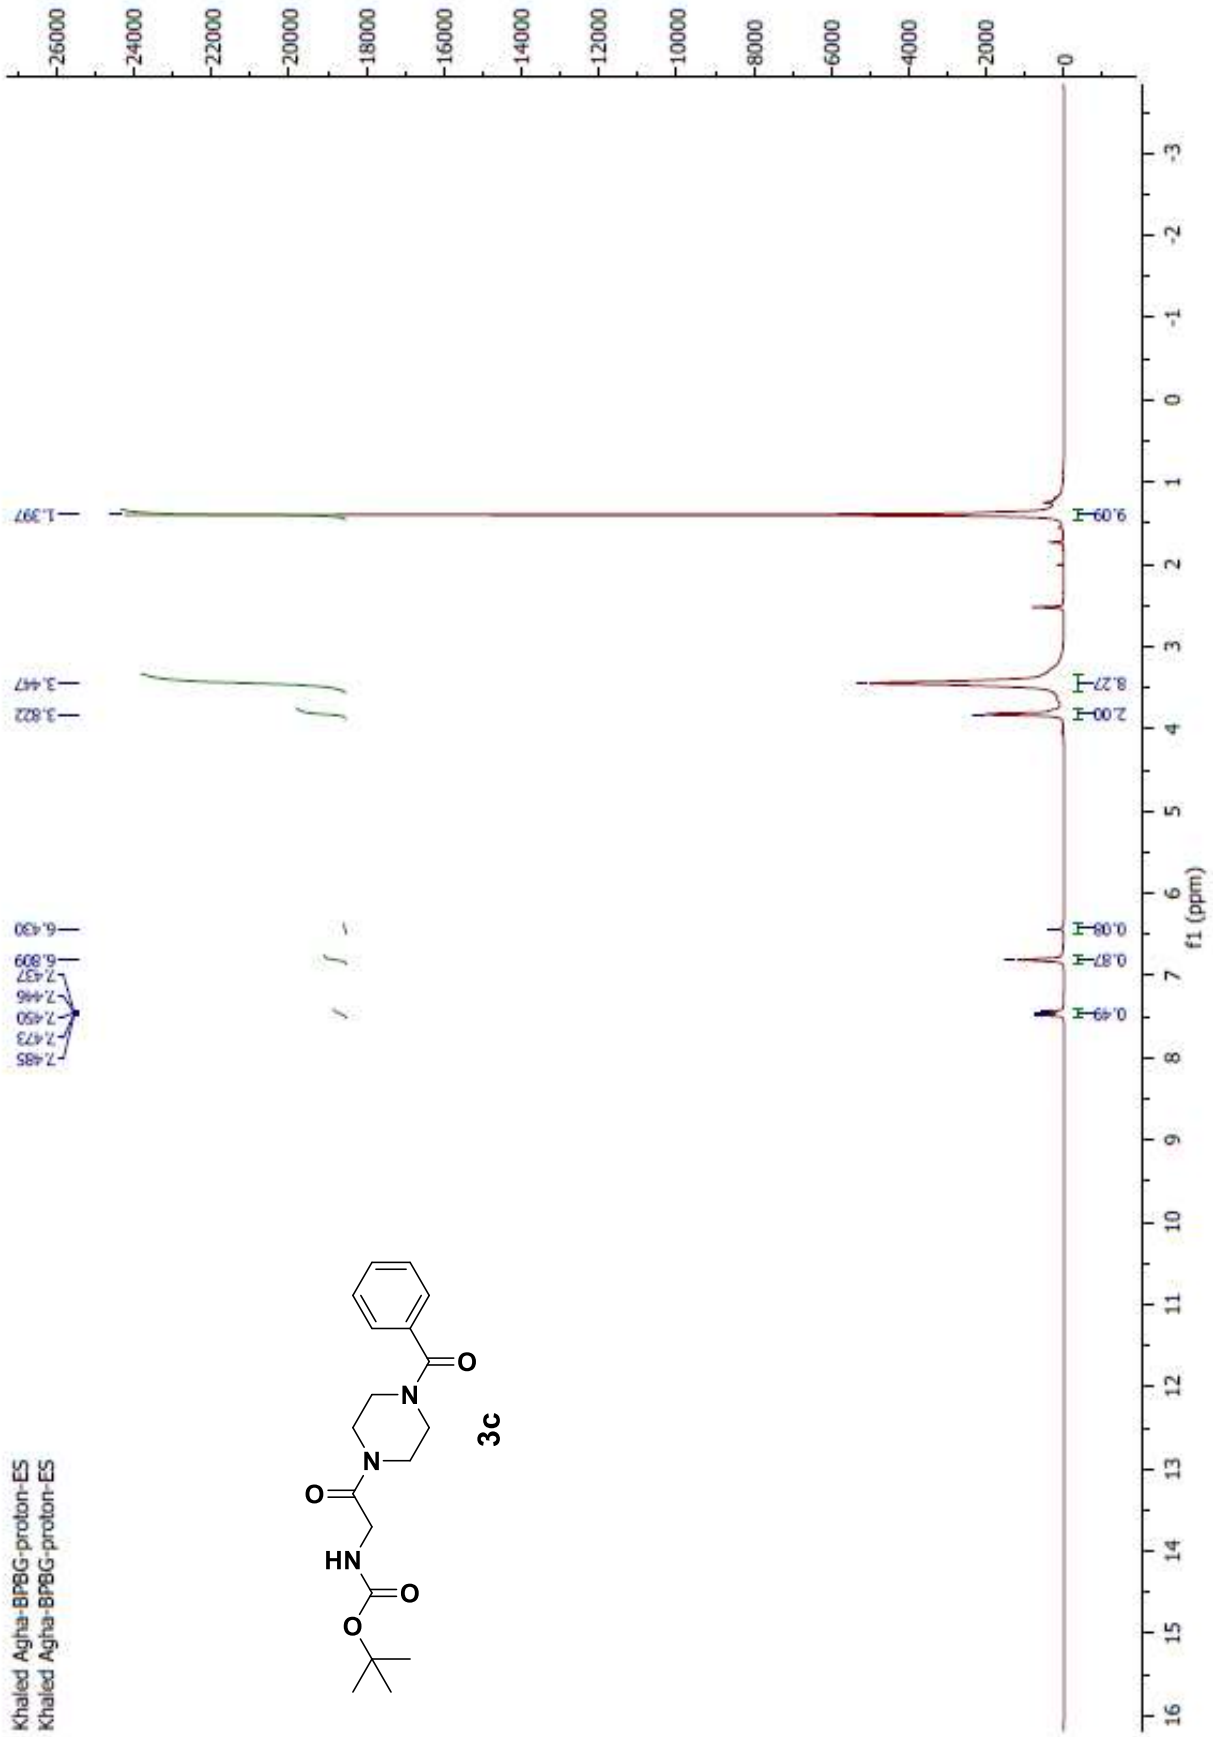

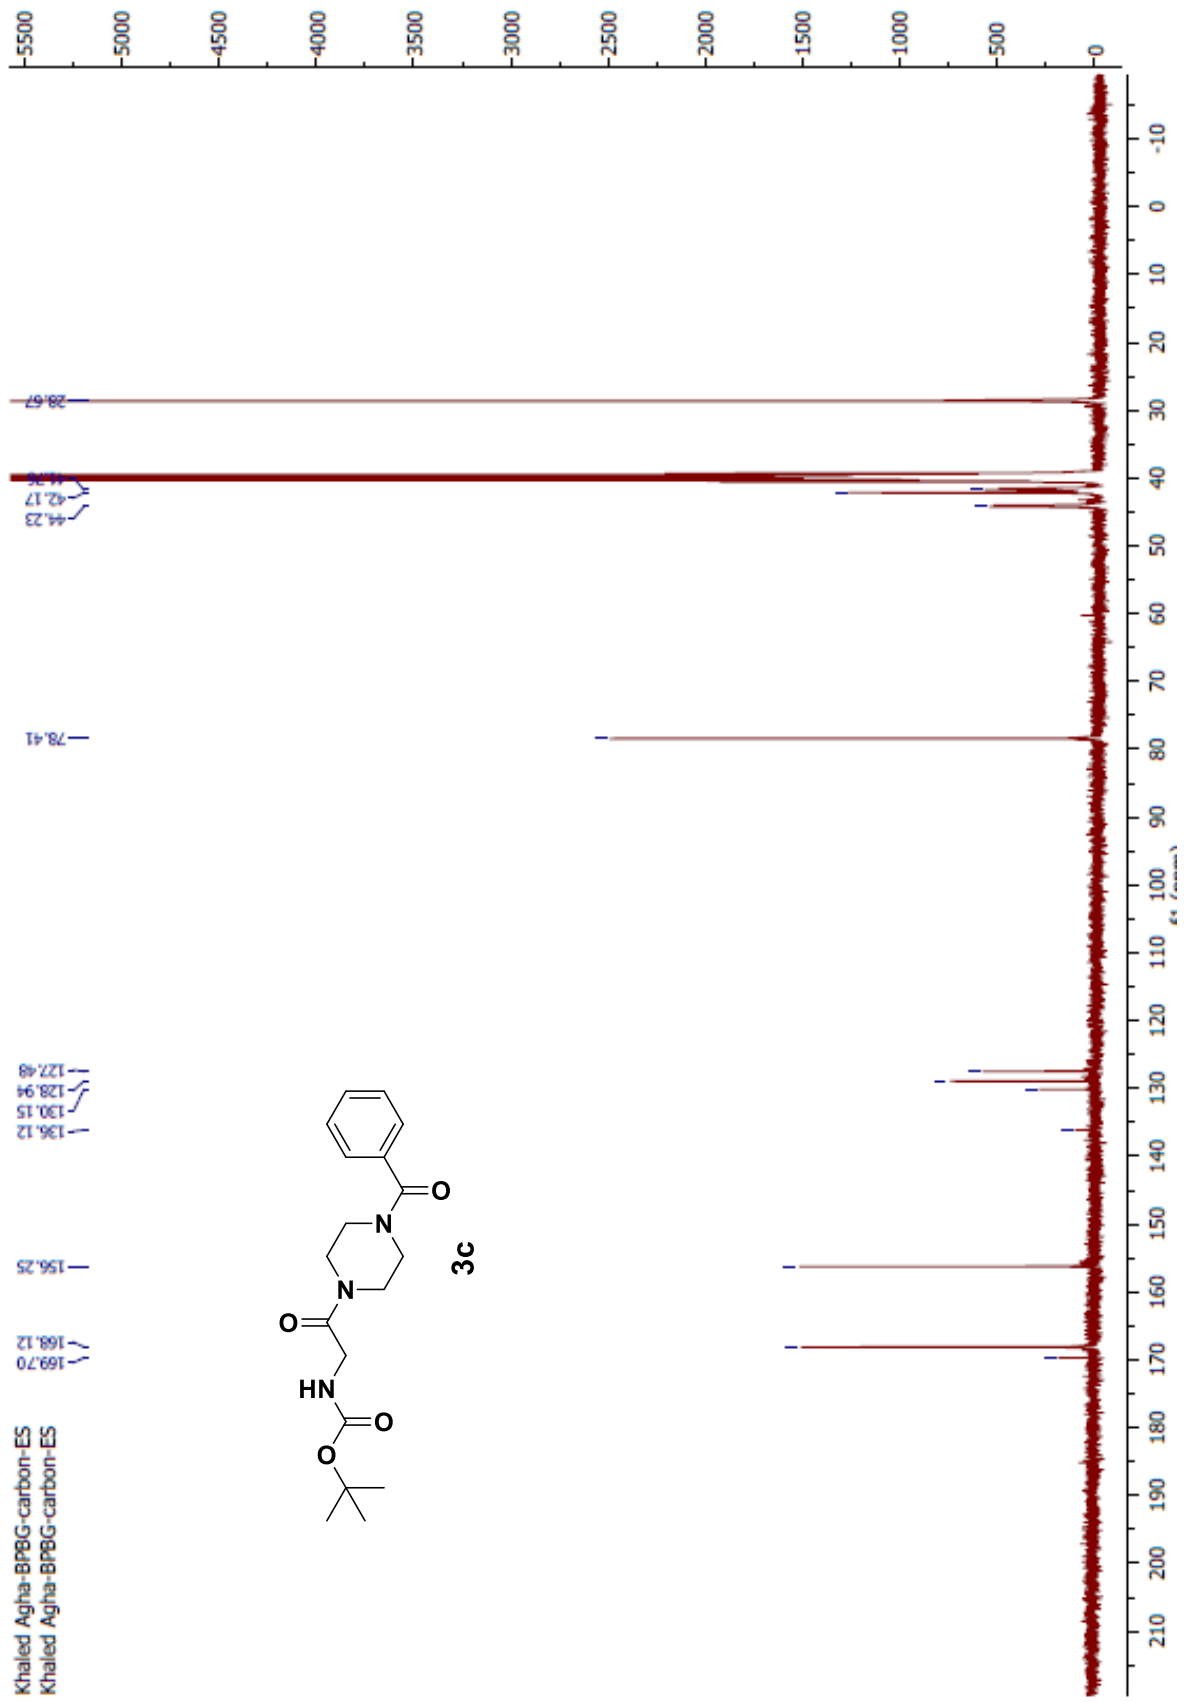

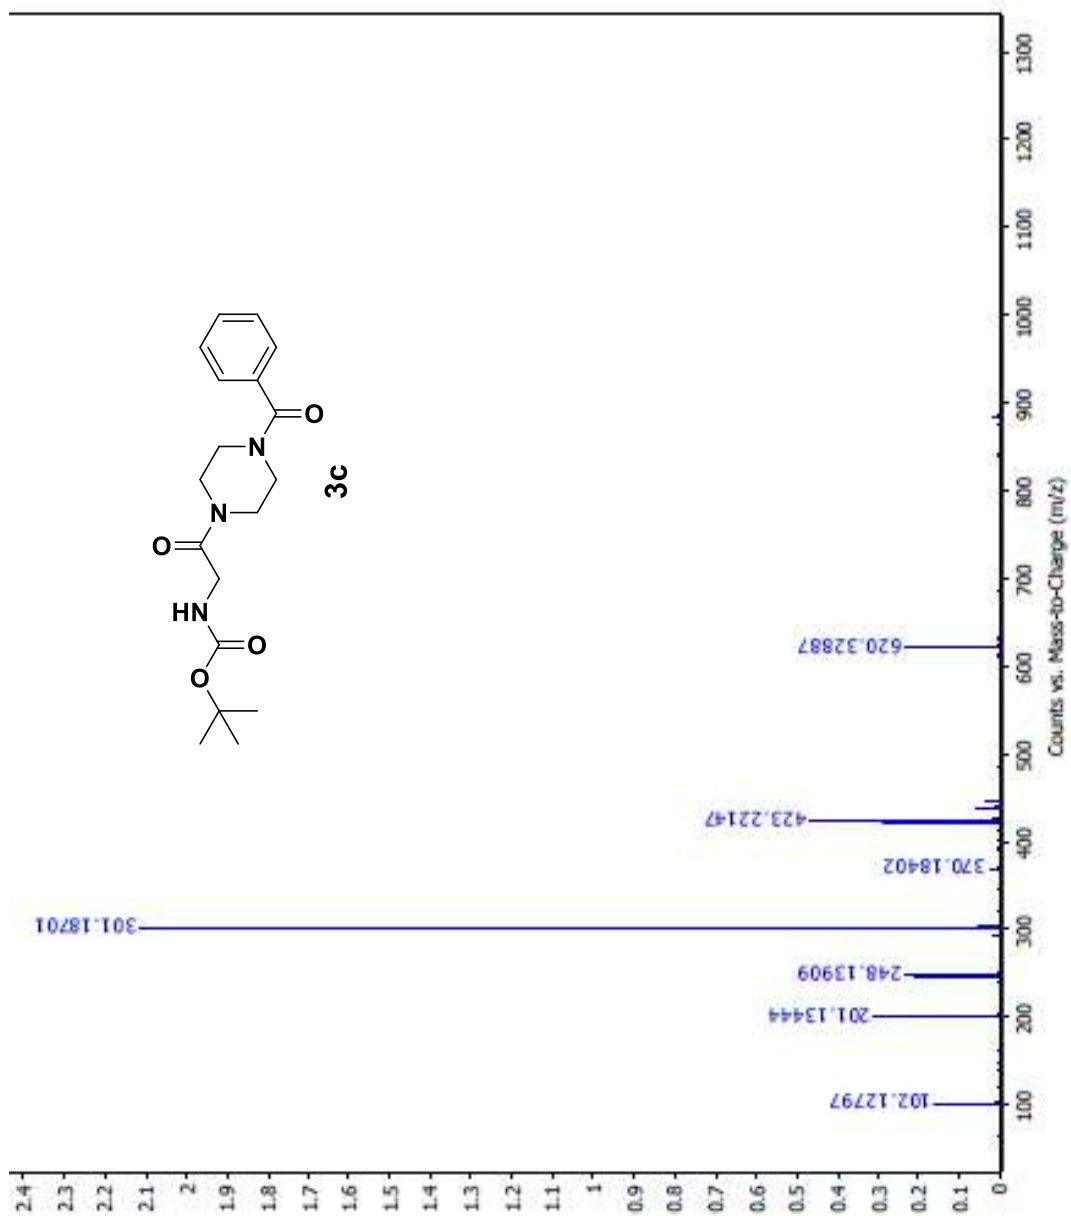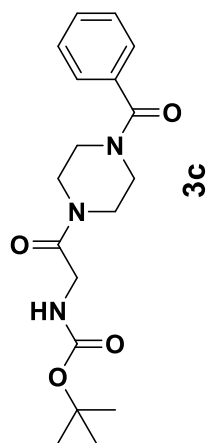



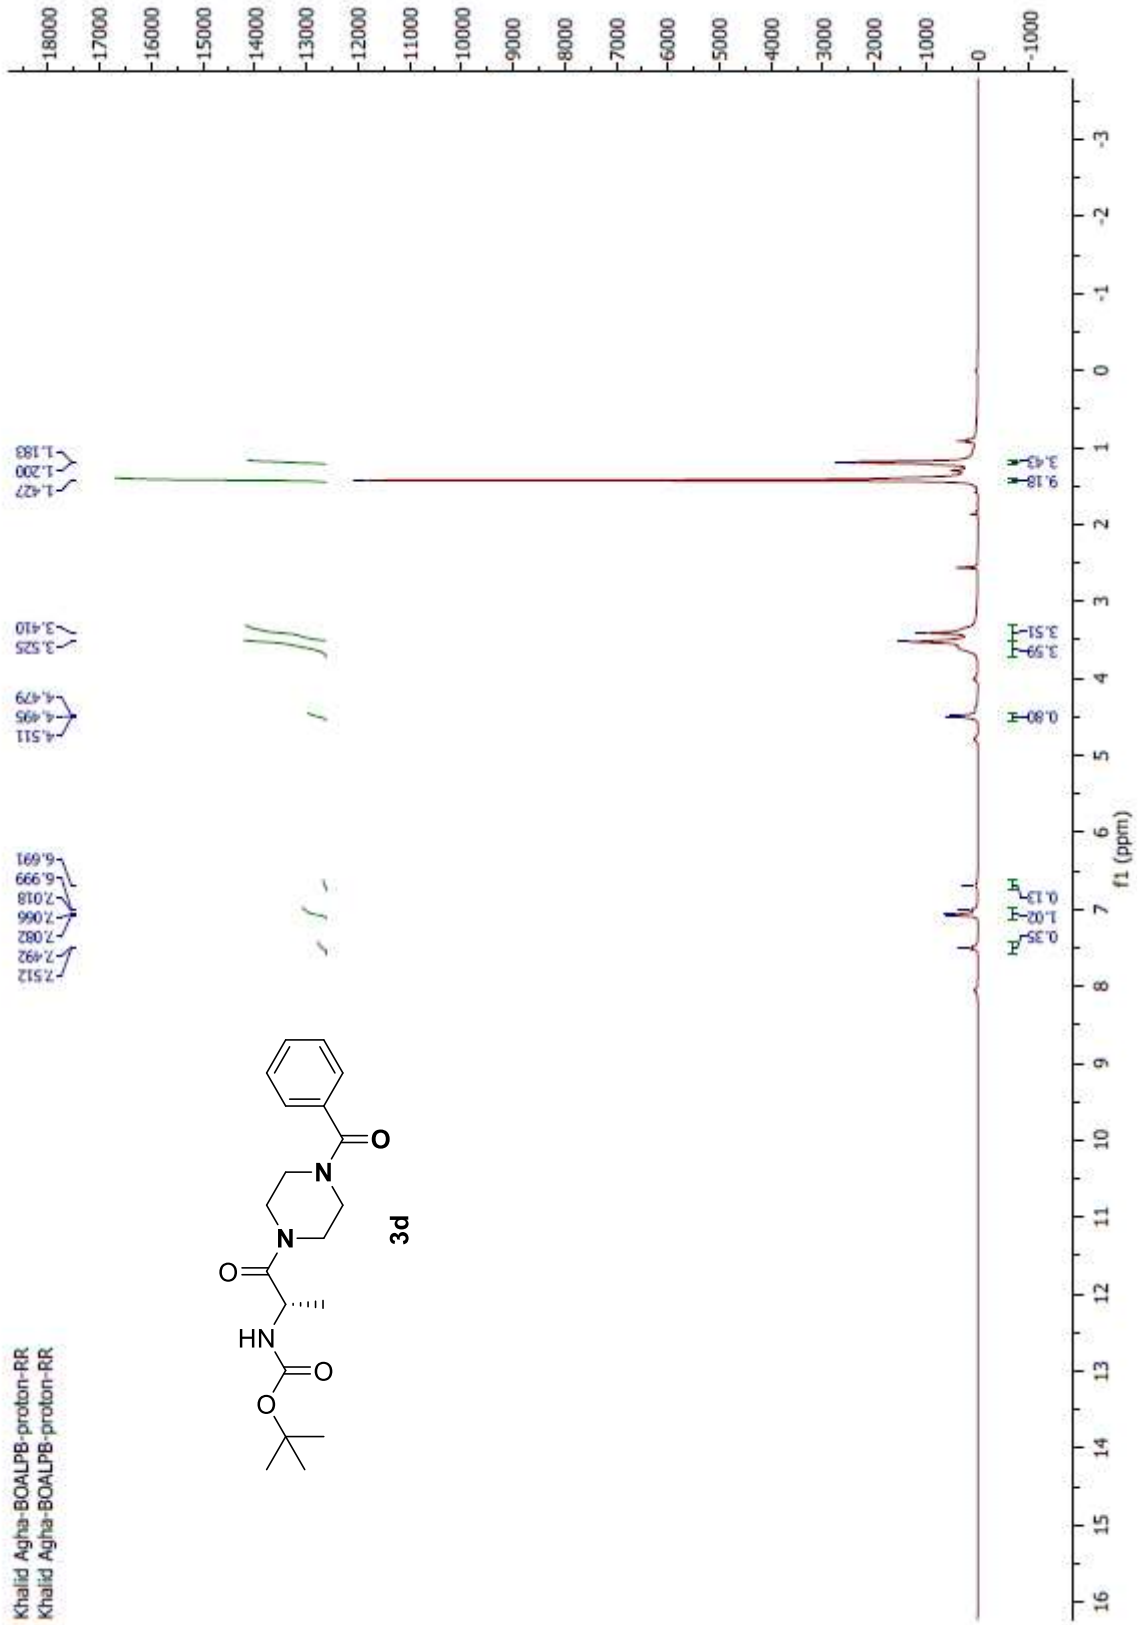

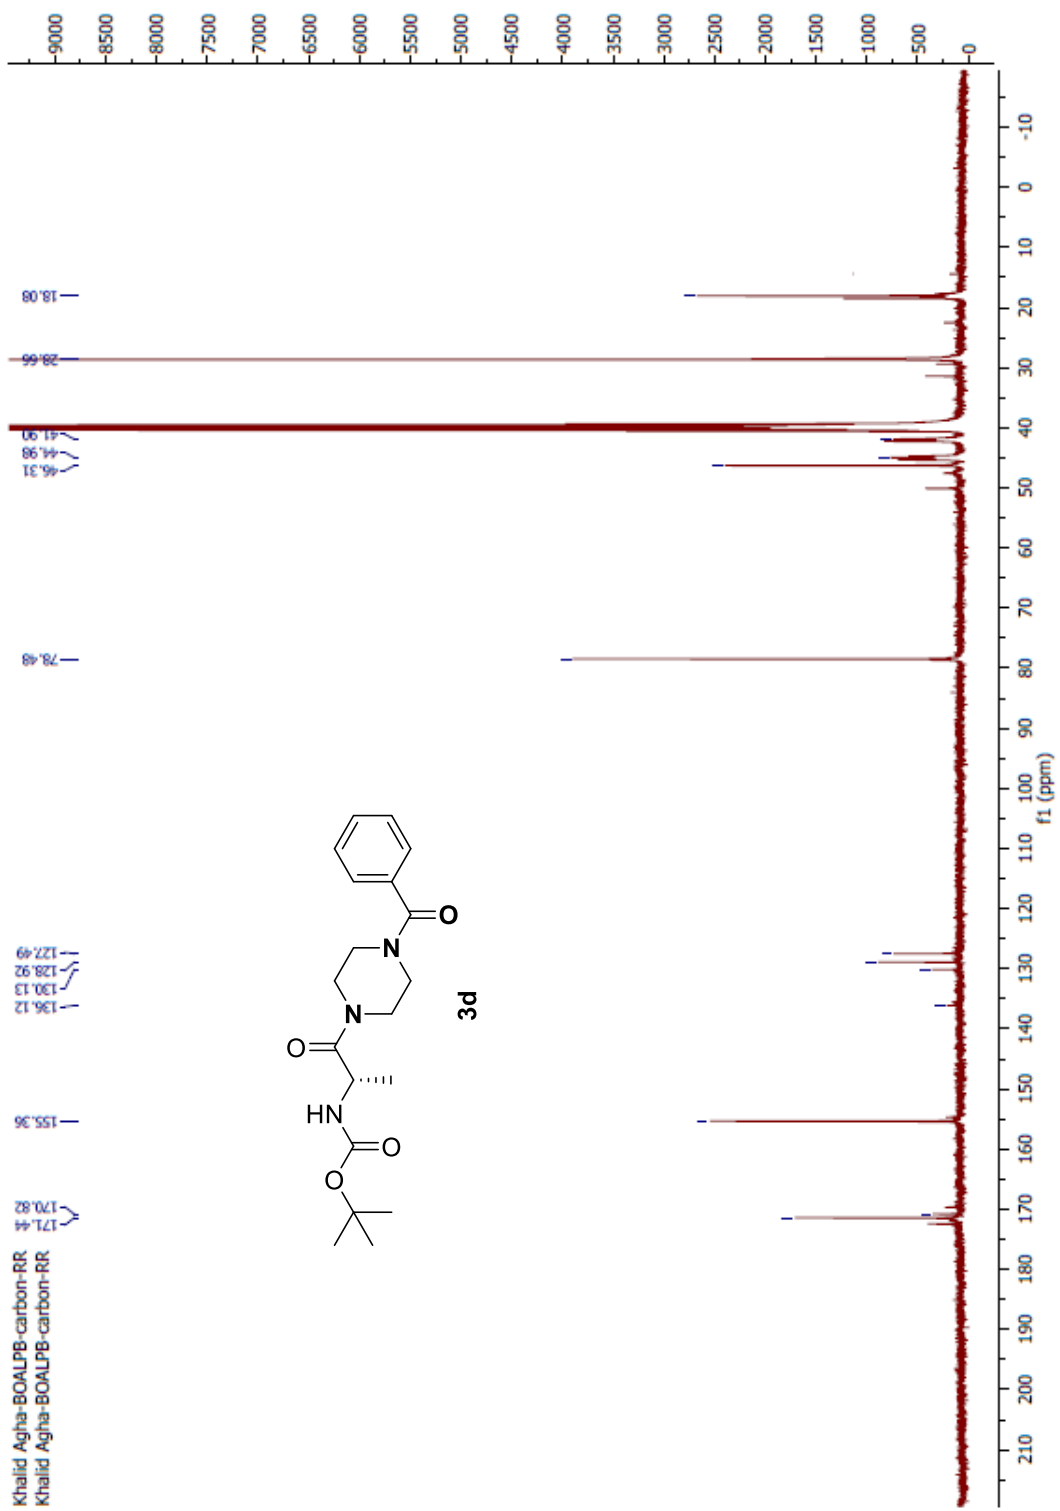

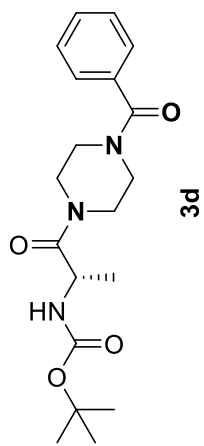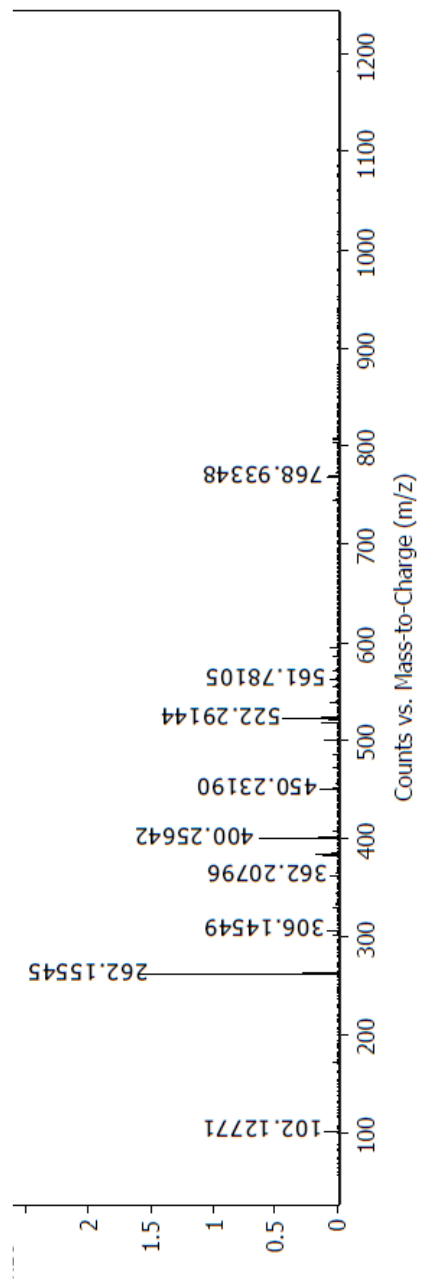

Peak List

| m/z       | z | Abund      |
|-----------|---|------------|
| 262.15545 | 1 | 1578466.38 |
| 263.15876 | 1 | 286410.34  |
| 381.18128 | 2 | 107872.13  |
| 384.1908  | 1 | 165550.41  |
| 400.25642 | 1 | 637177.56  |
| 401.2593  | 1 | 151639.13  |
| 450.2319  | 2 | 138375.19  |
| 519.28227 | 2 | 120170.31  |
| 522.29144 | 1 | 427703.19  |
| 523.29437 | 1 | 130557.73  |

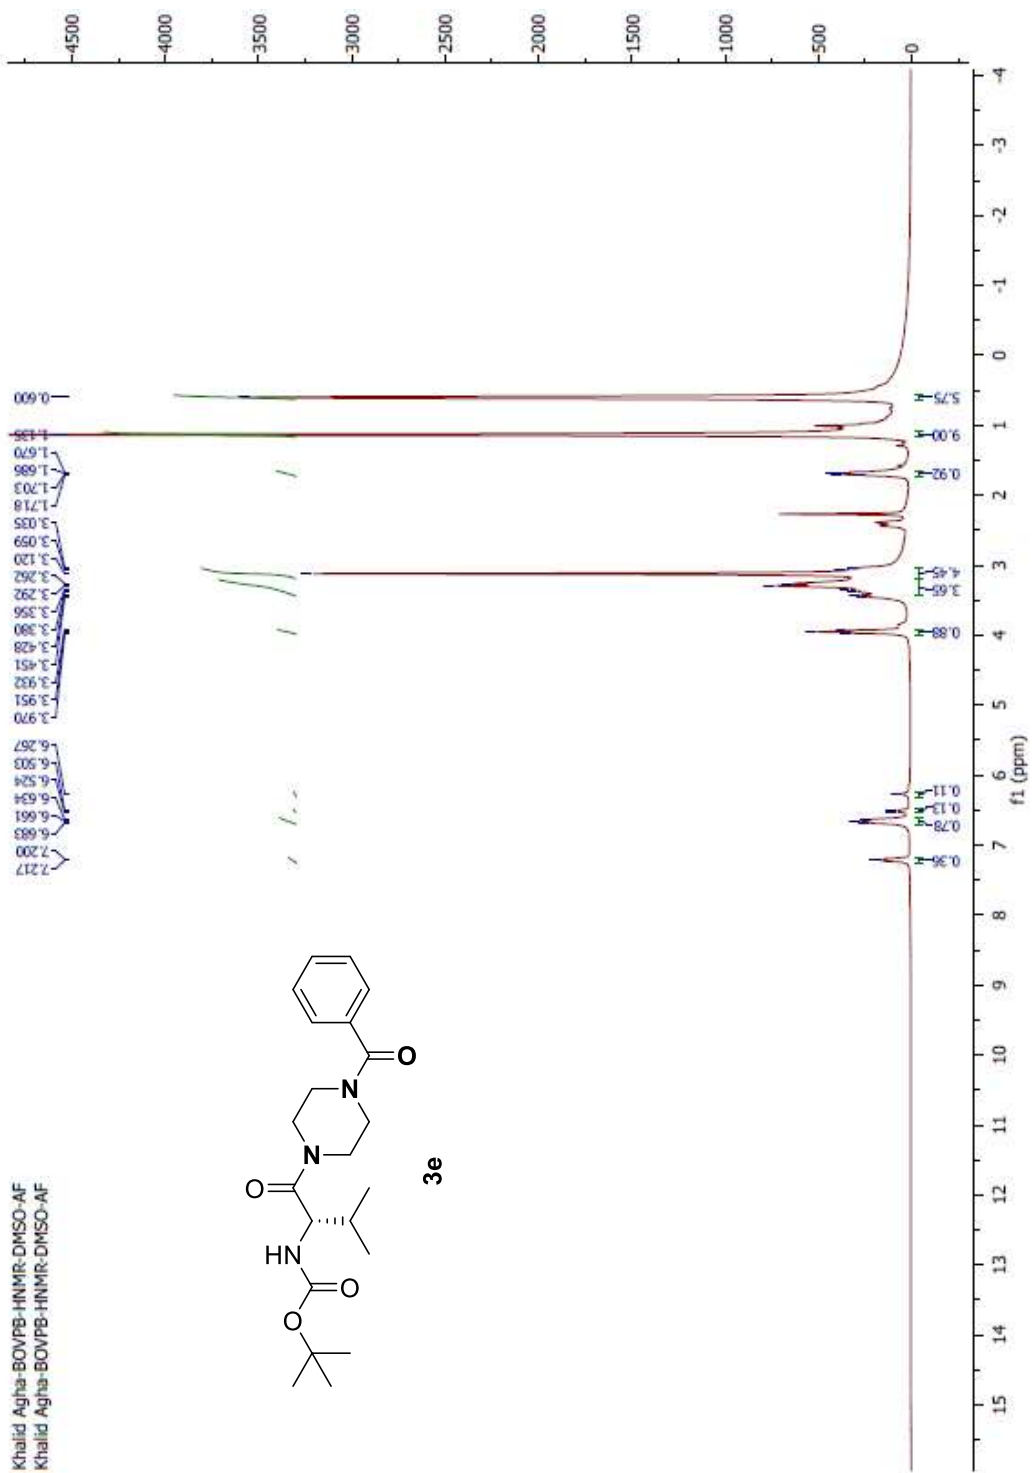

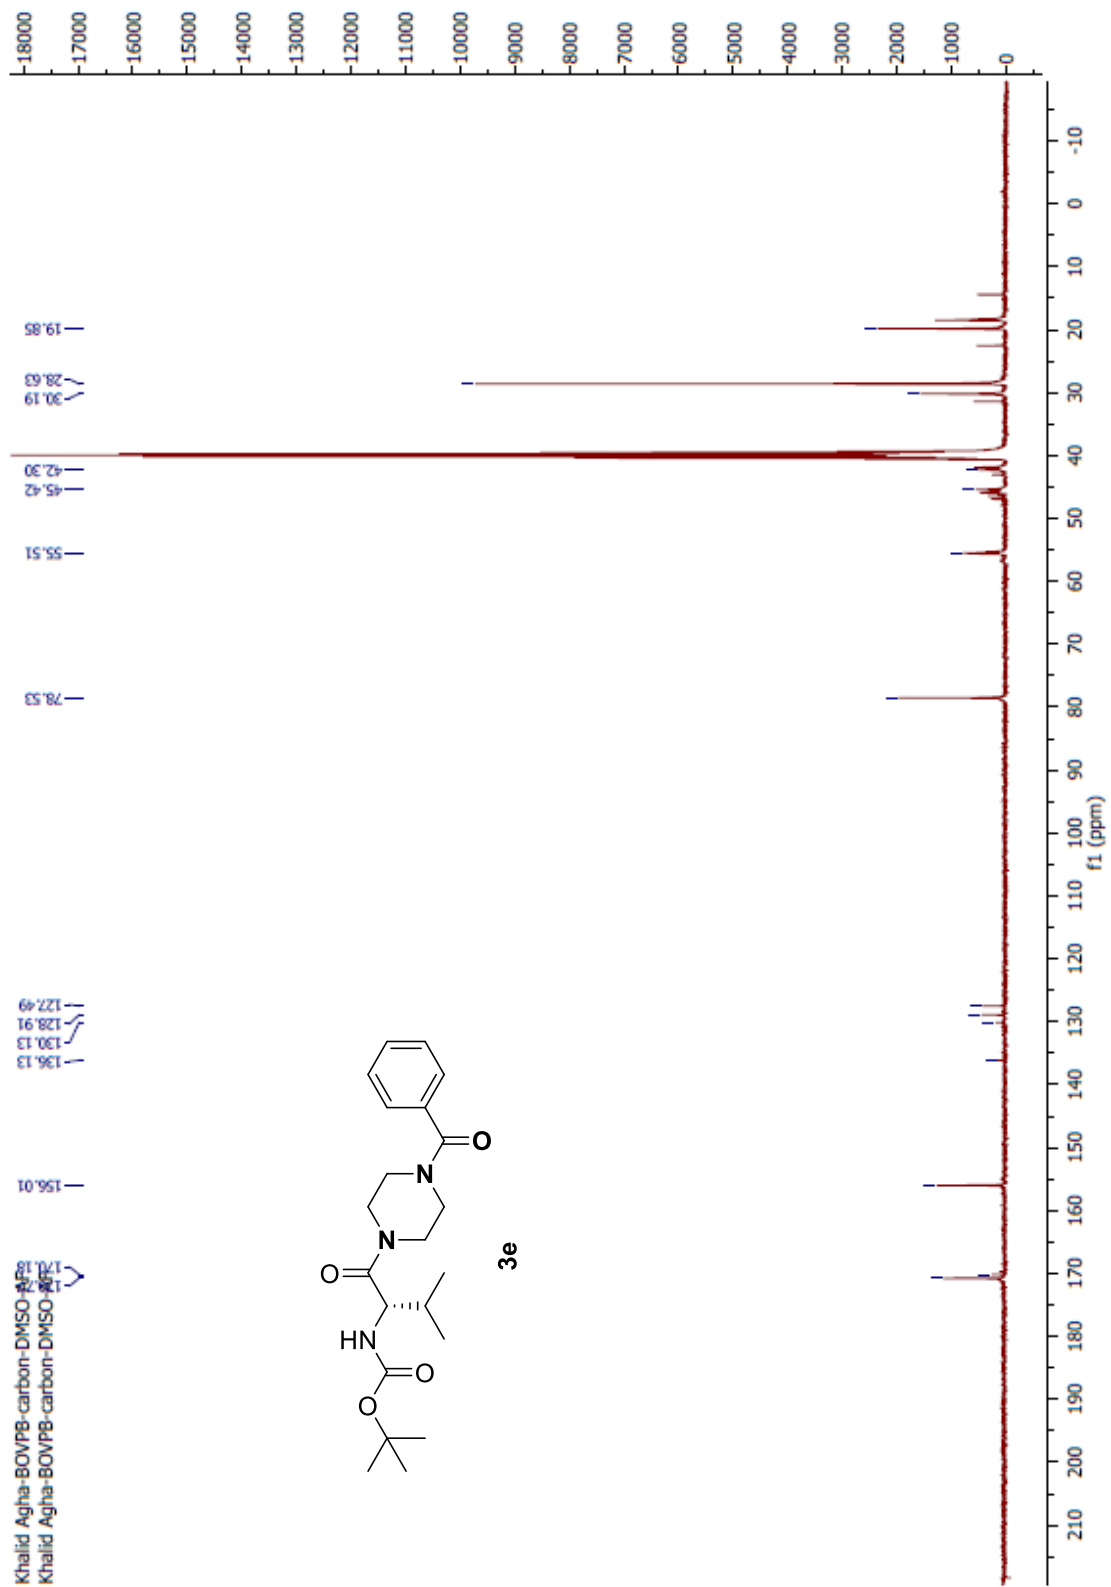

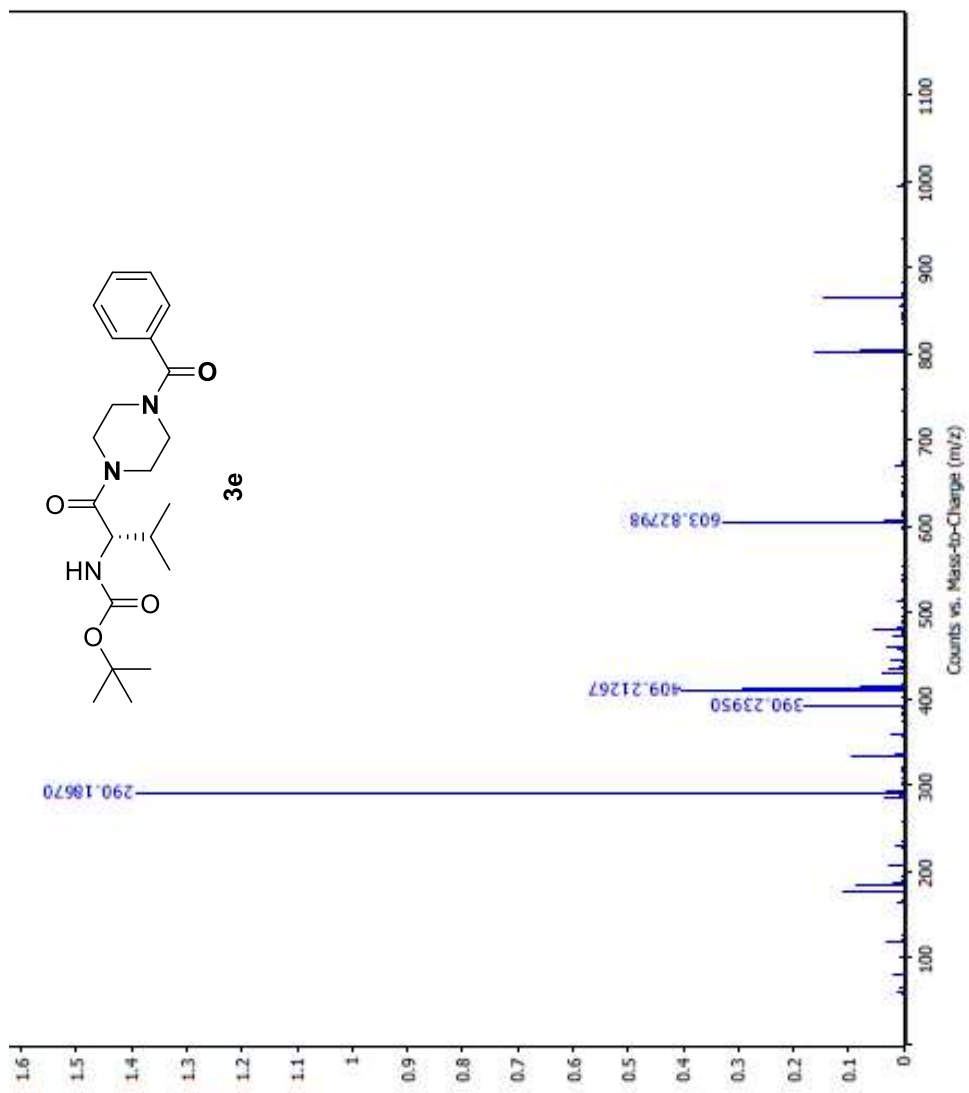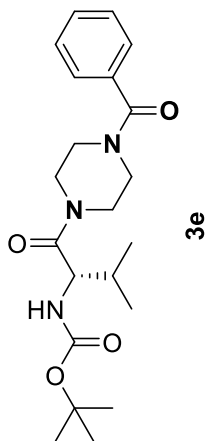

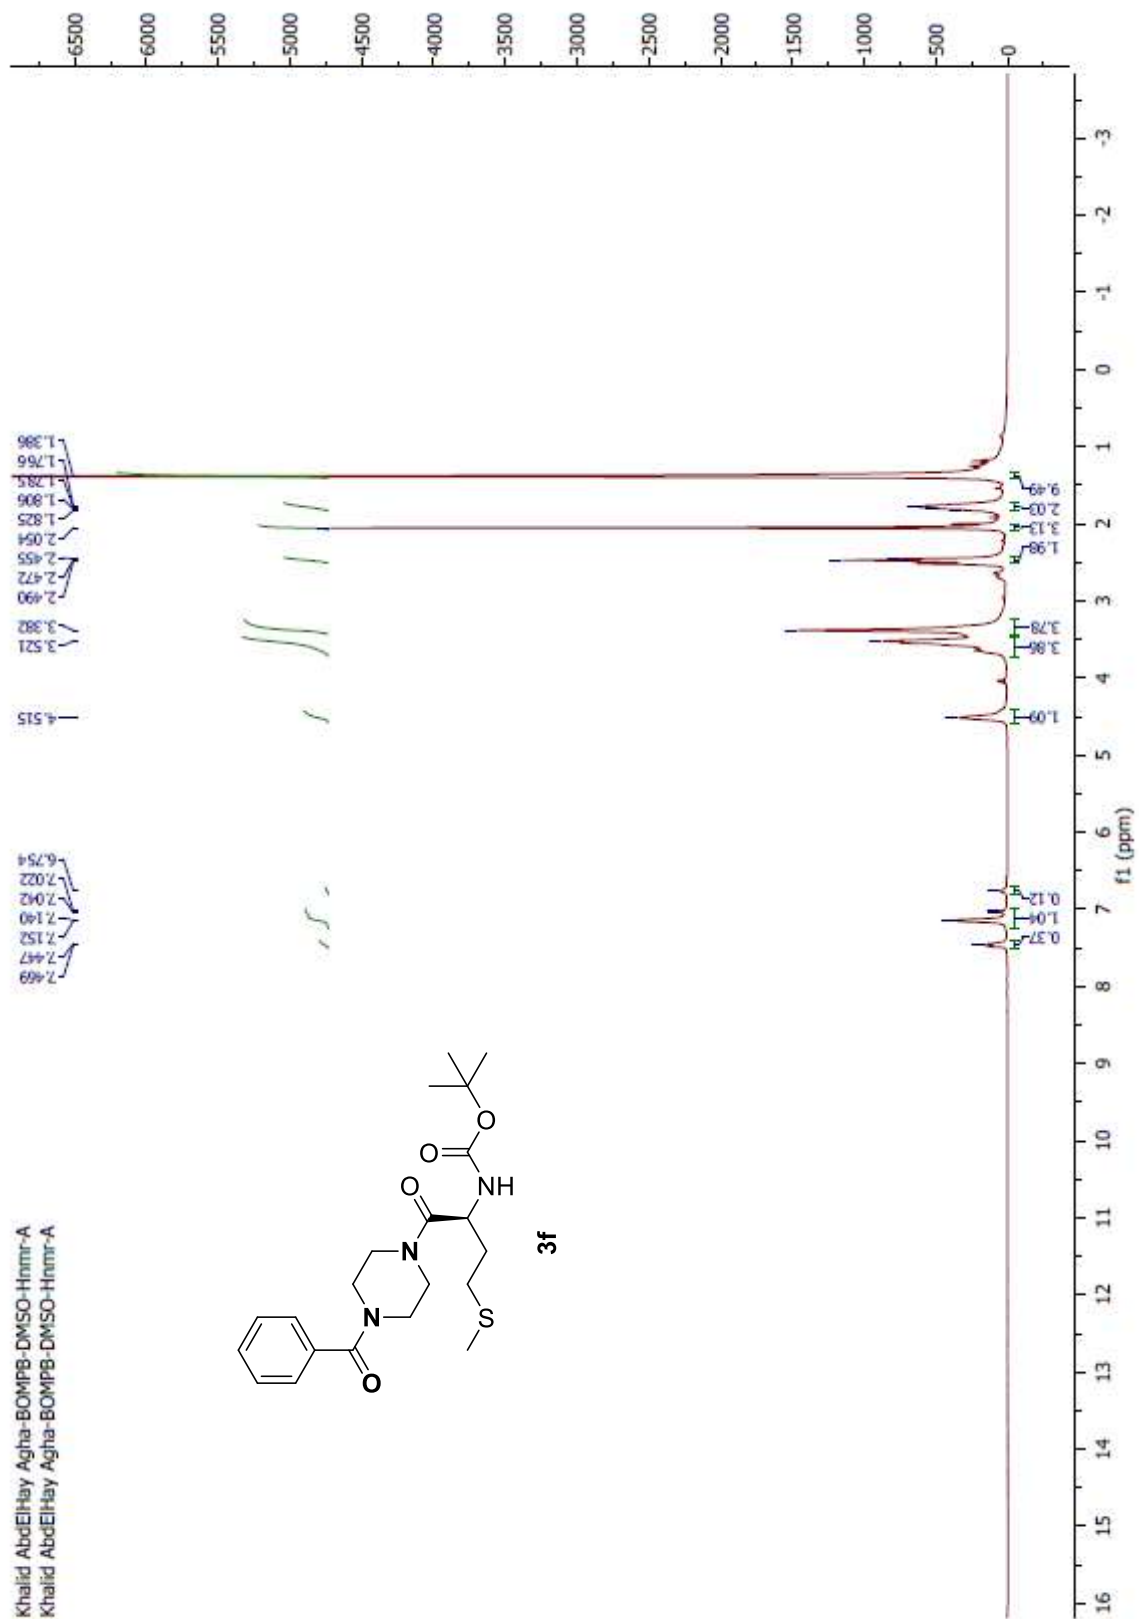

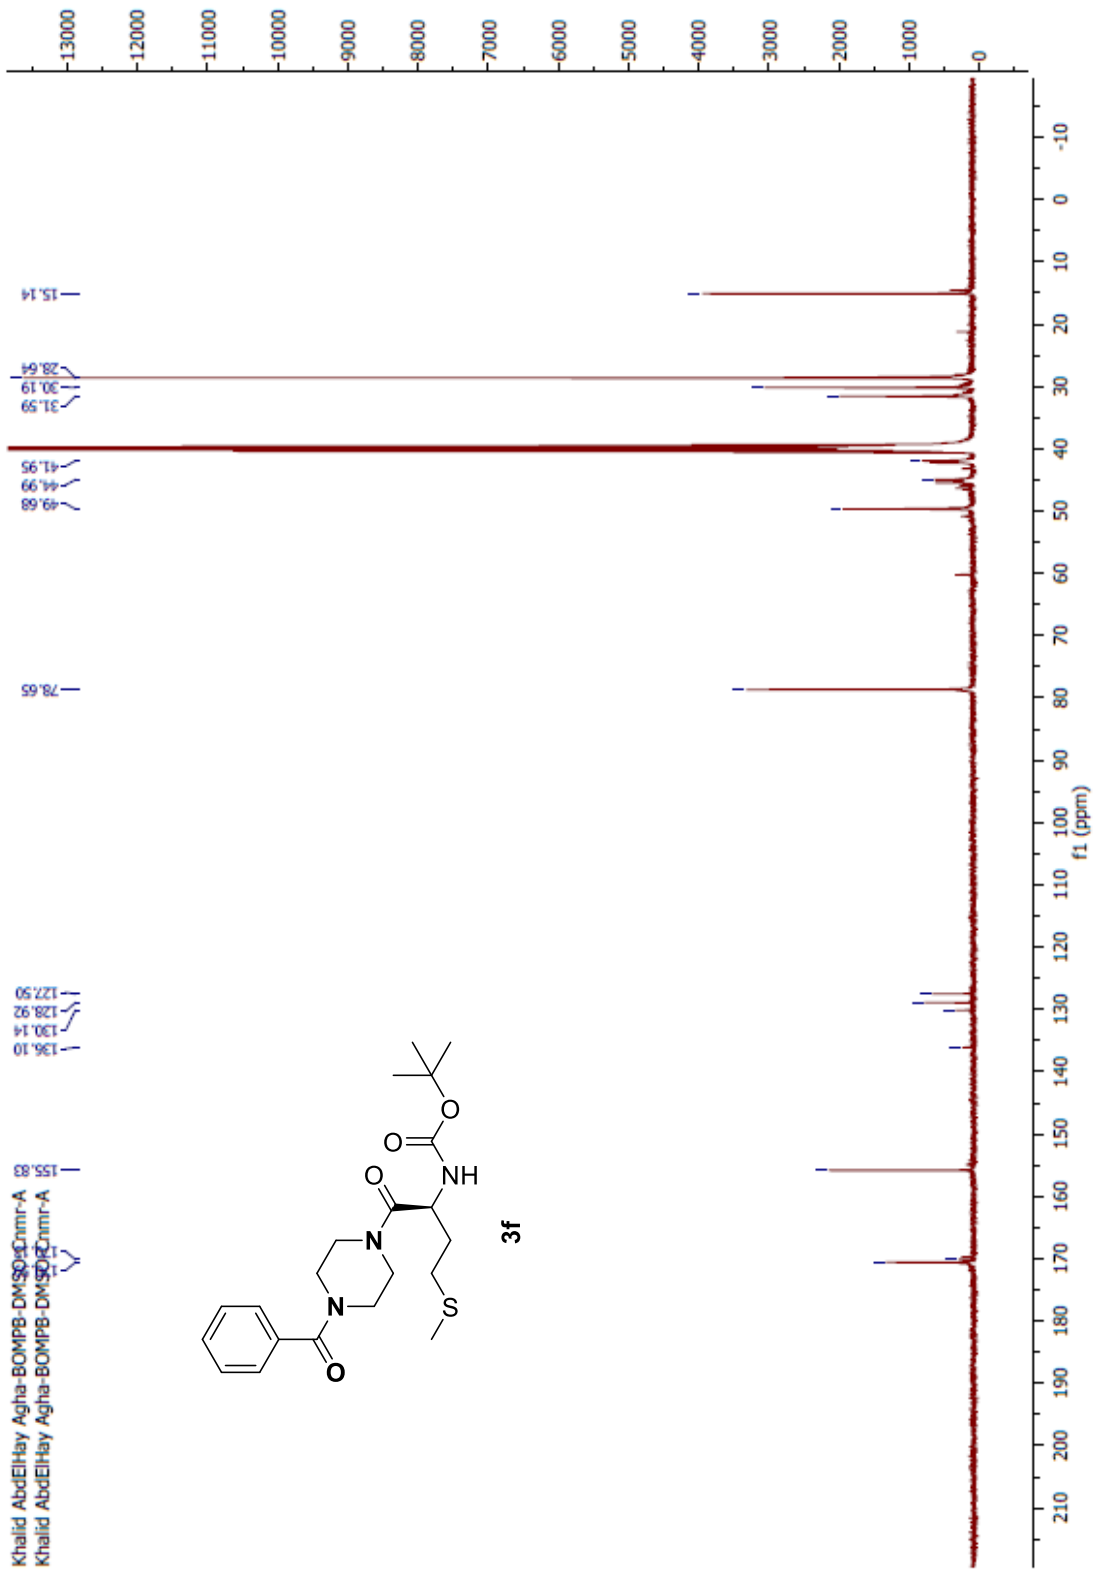



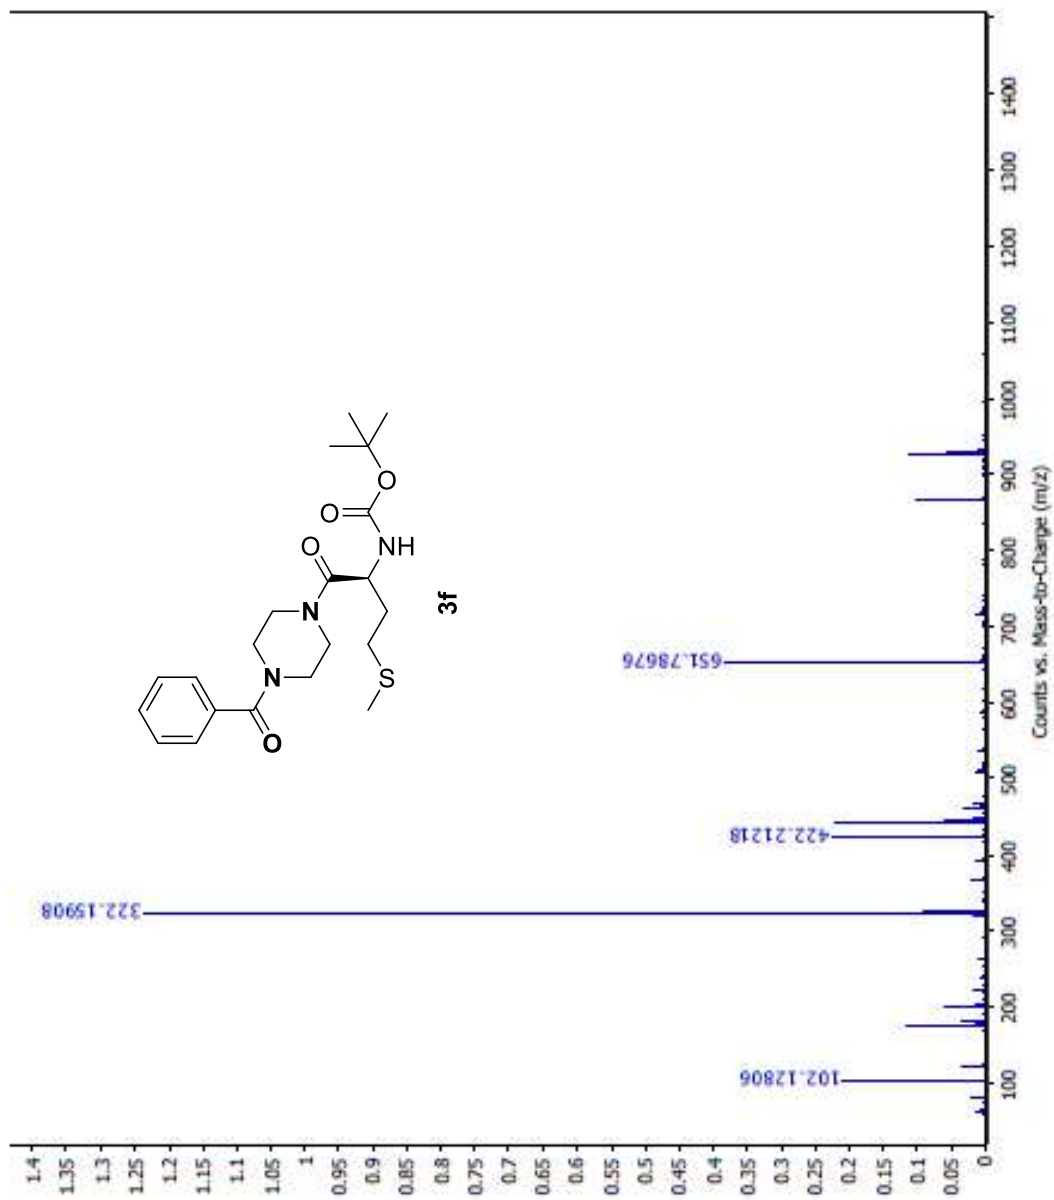

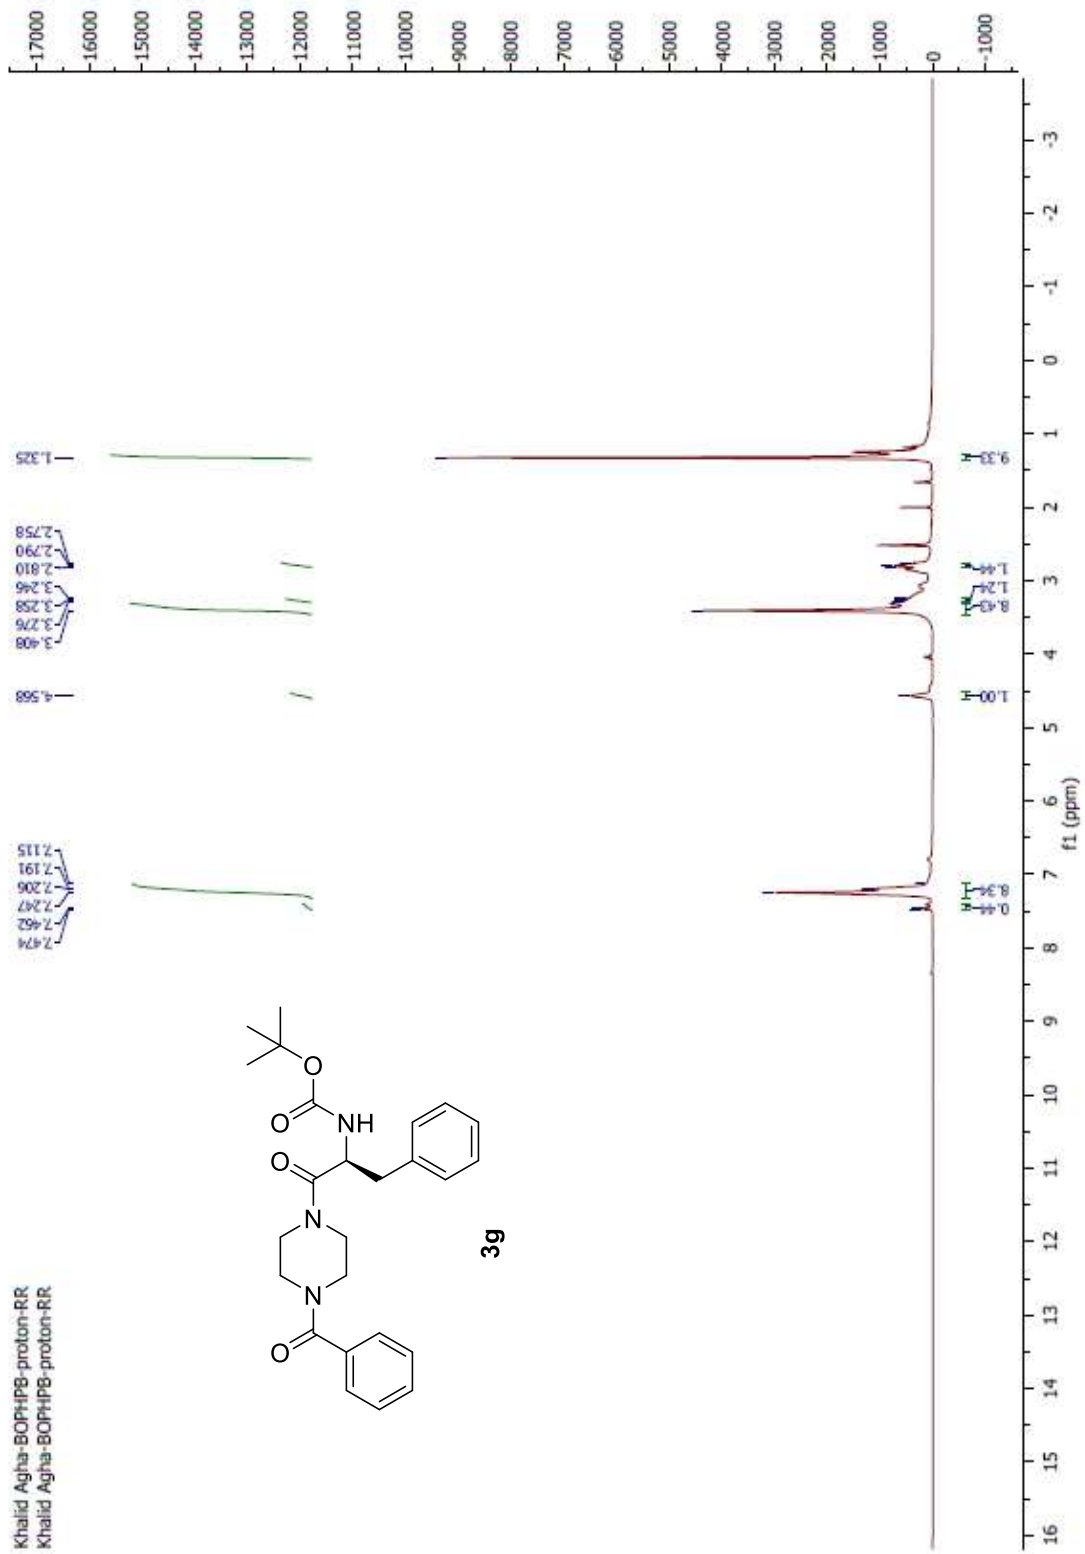

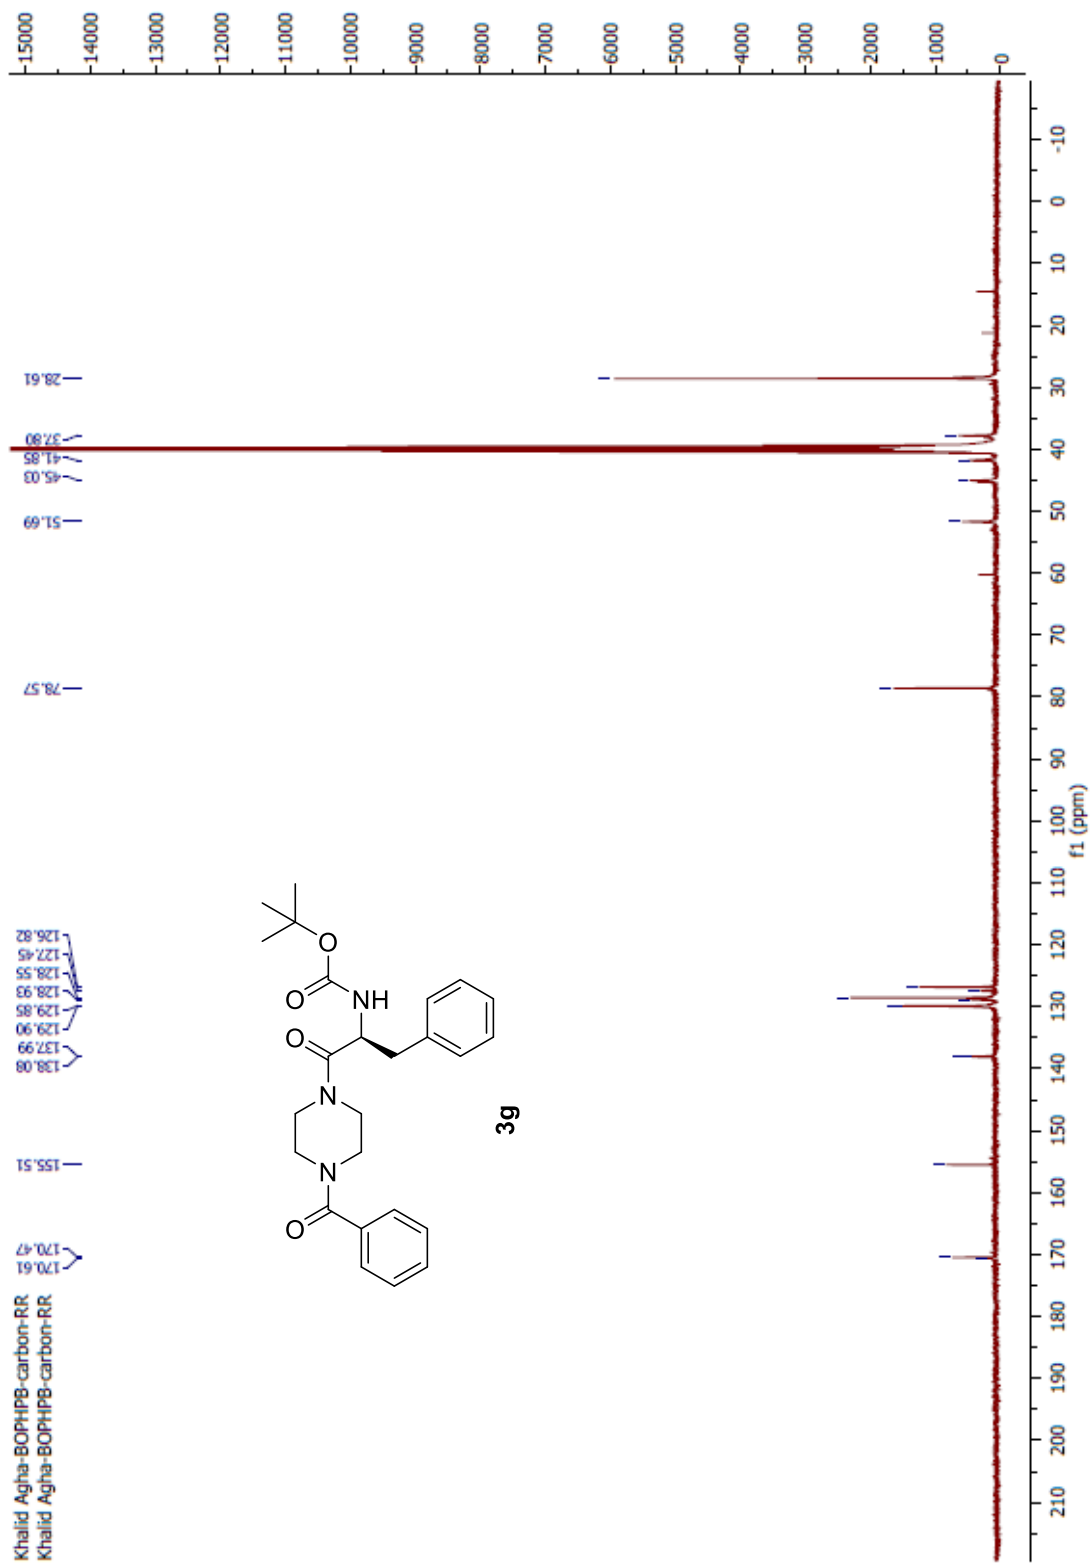

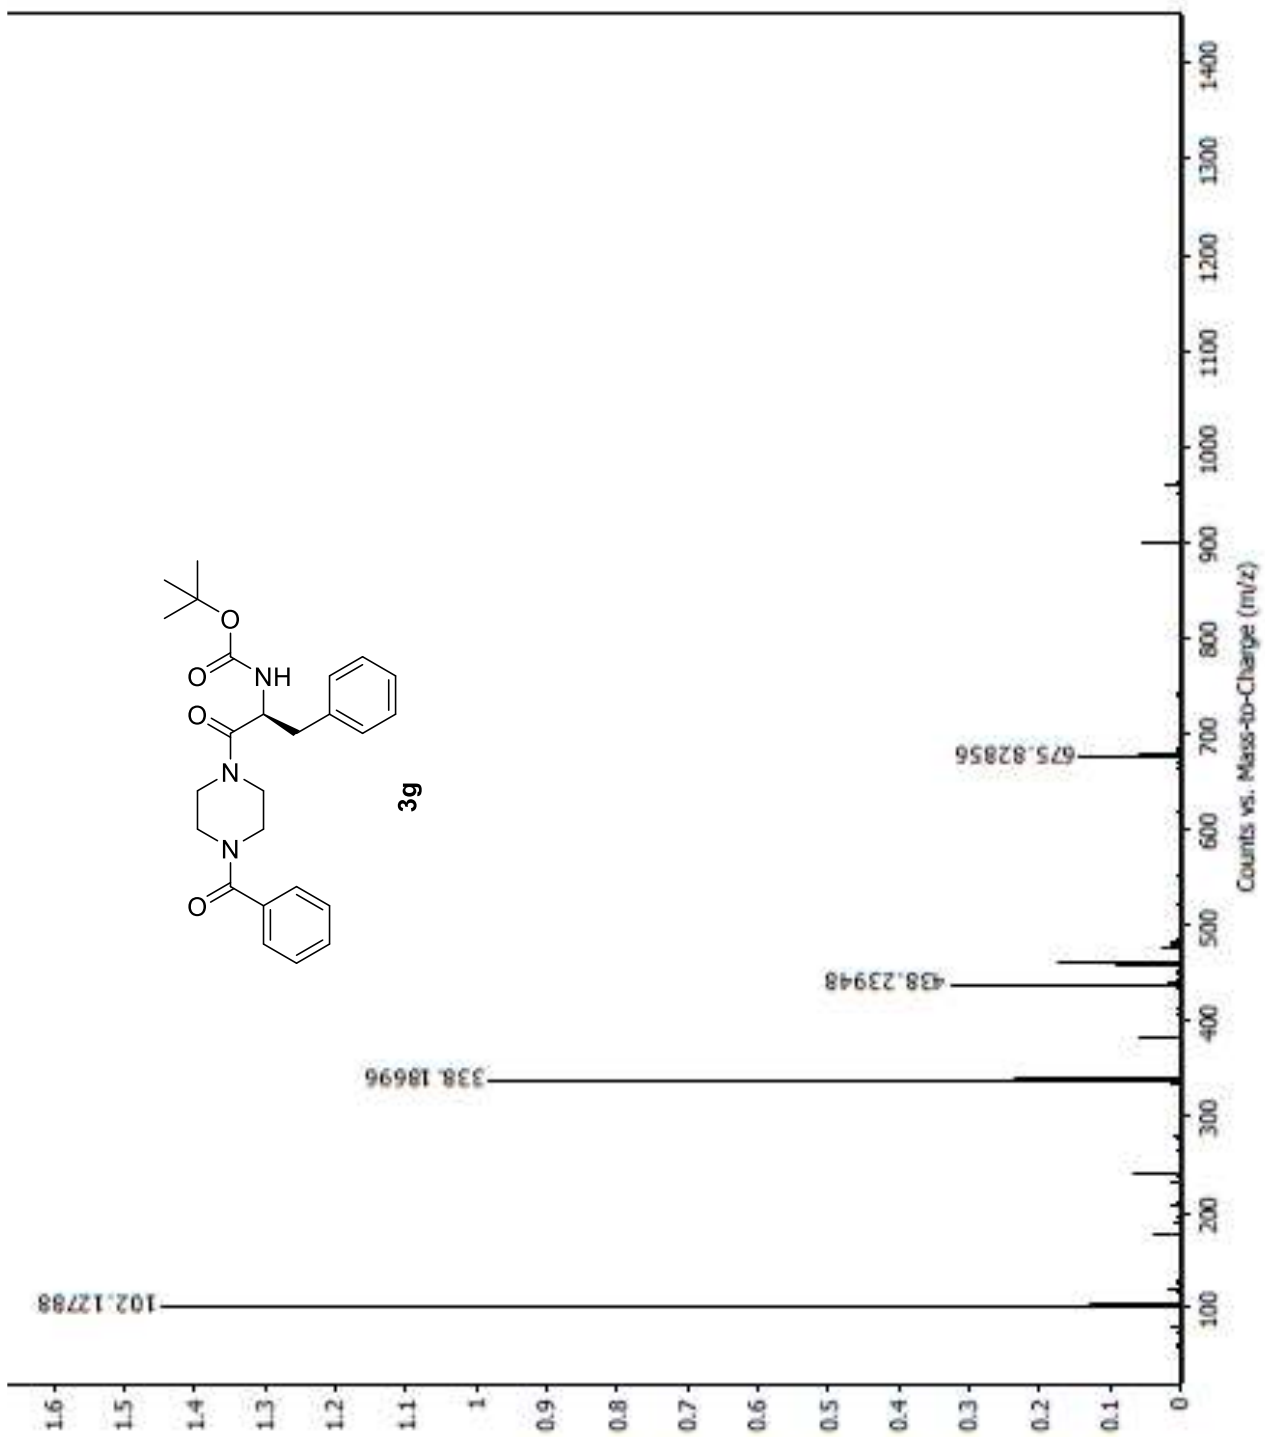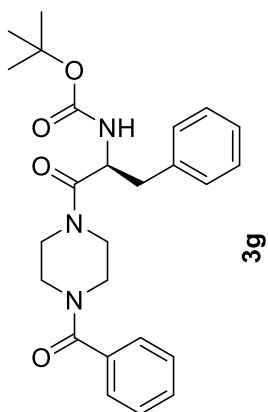

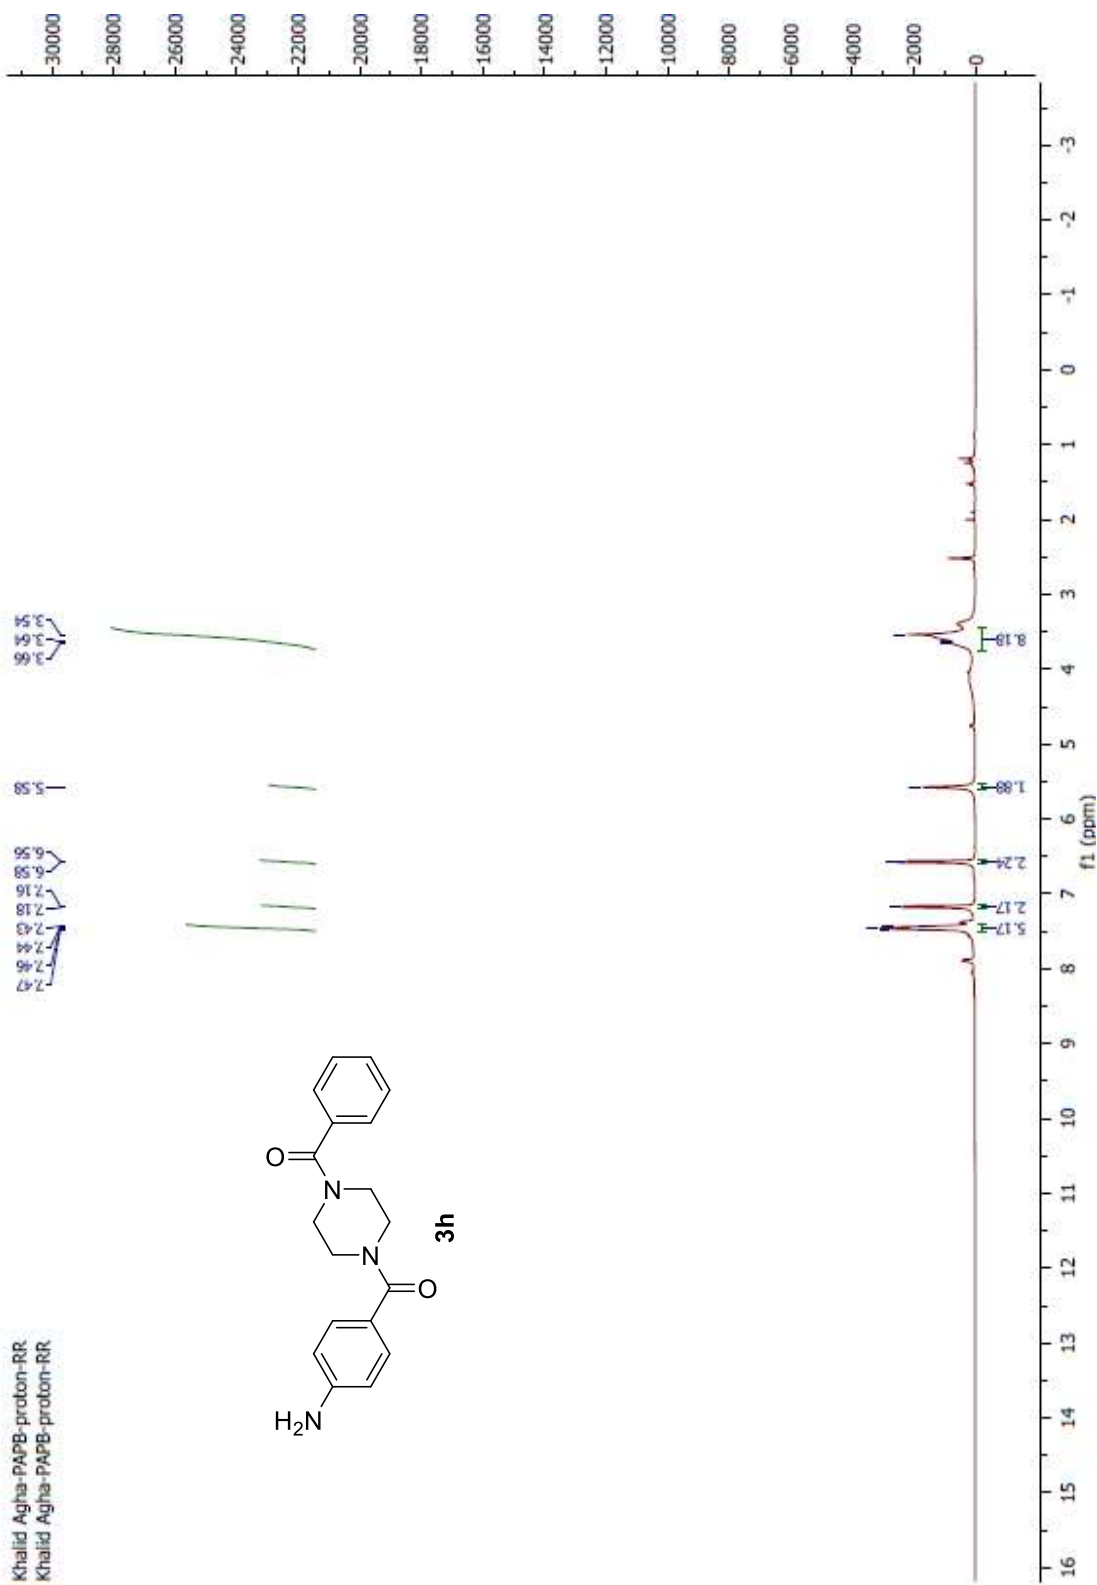

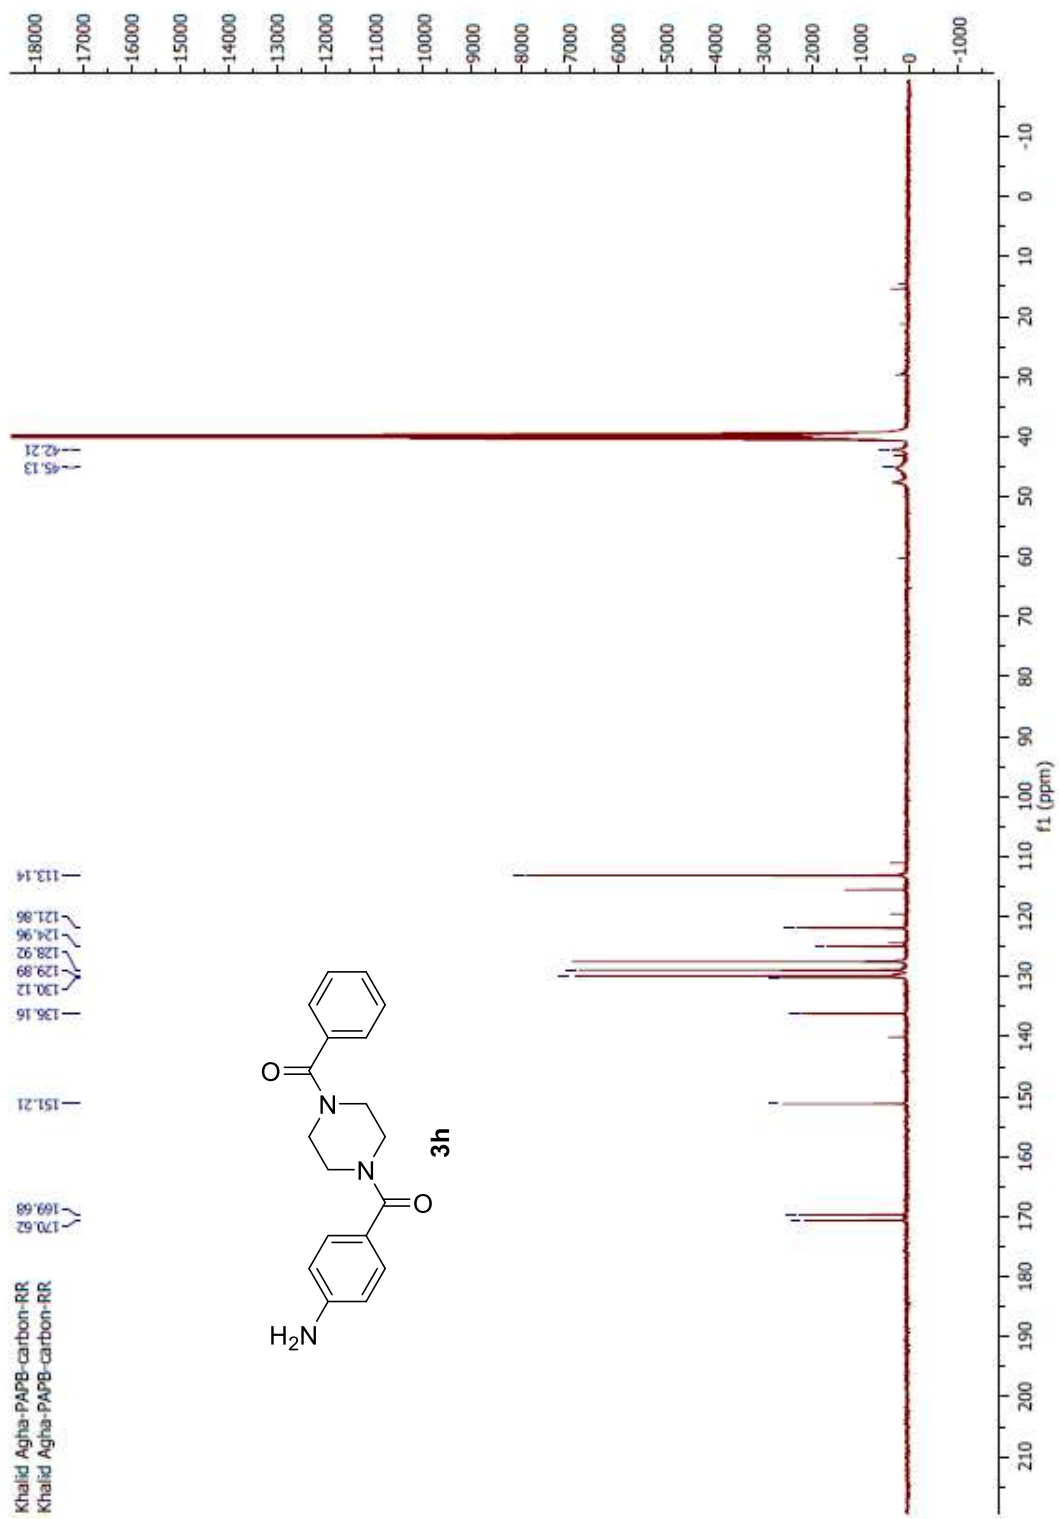

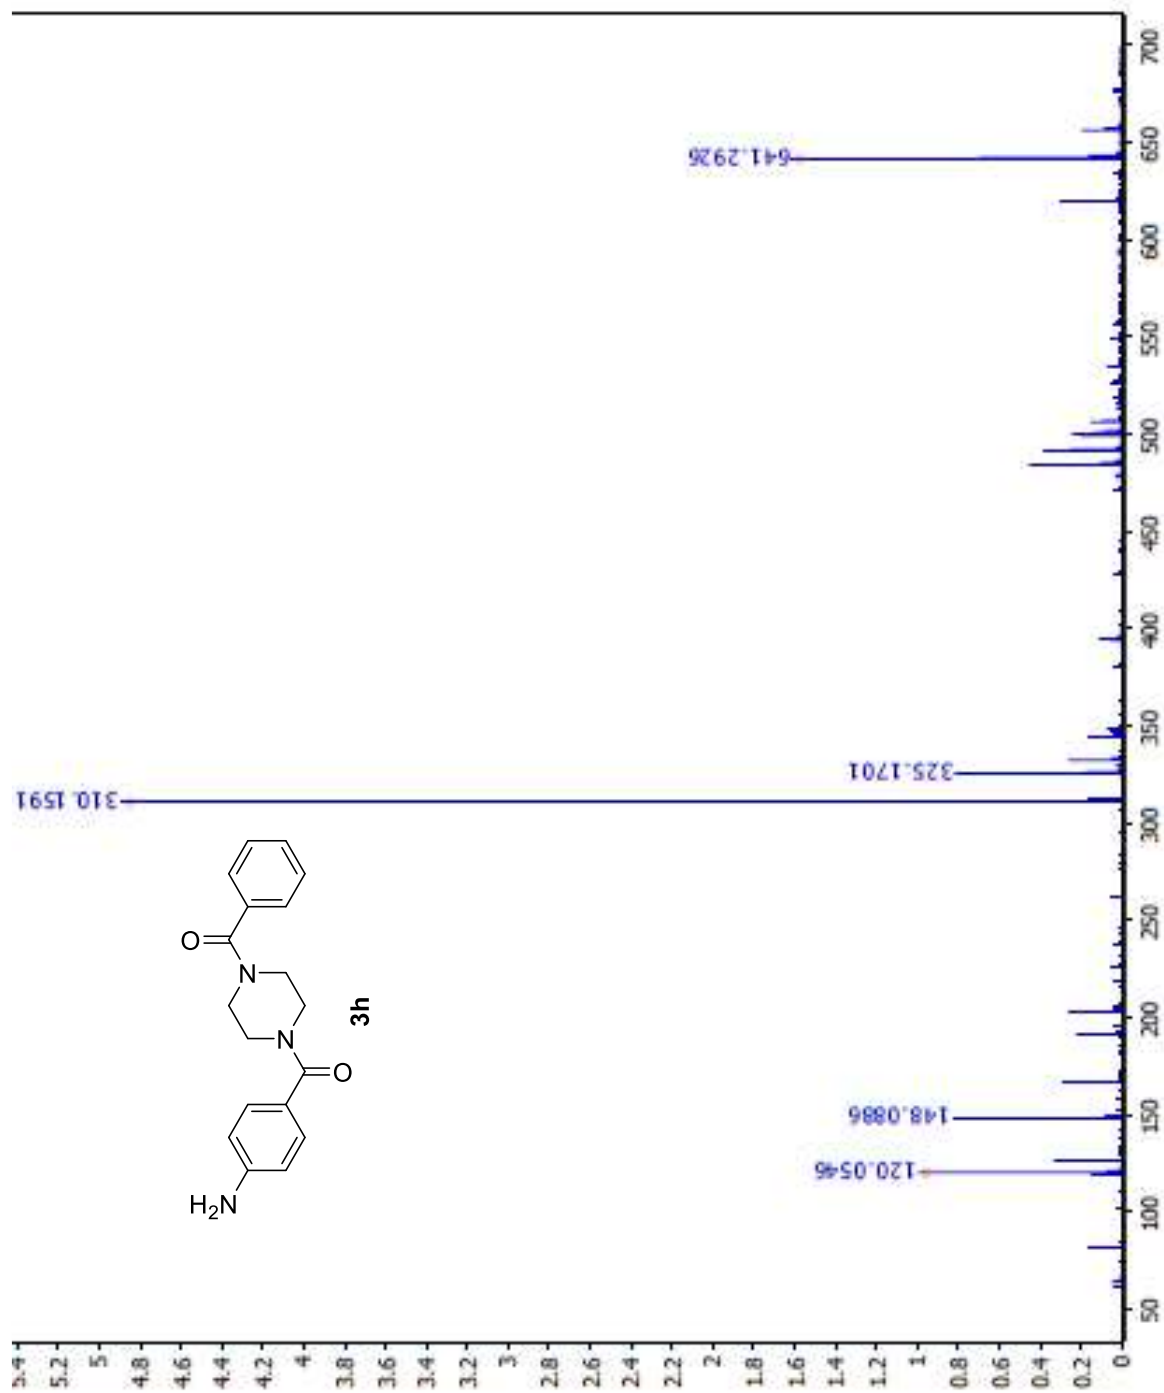

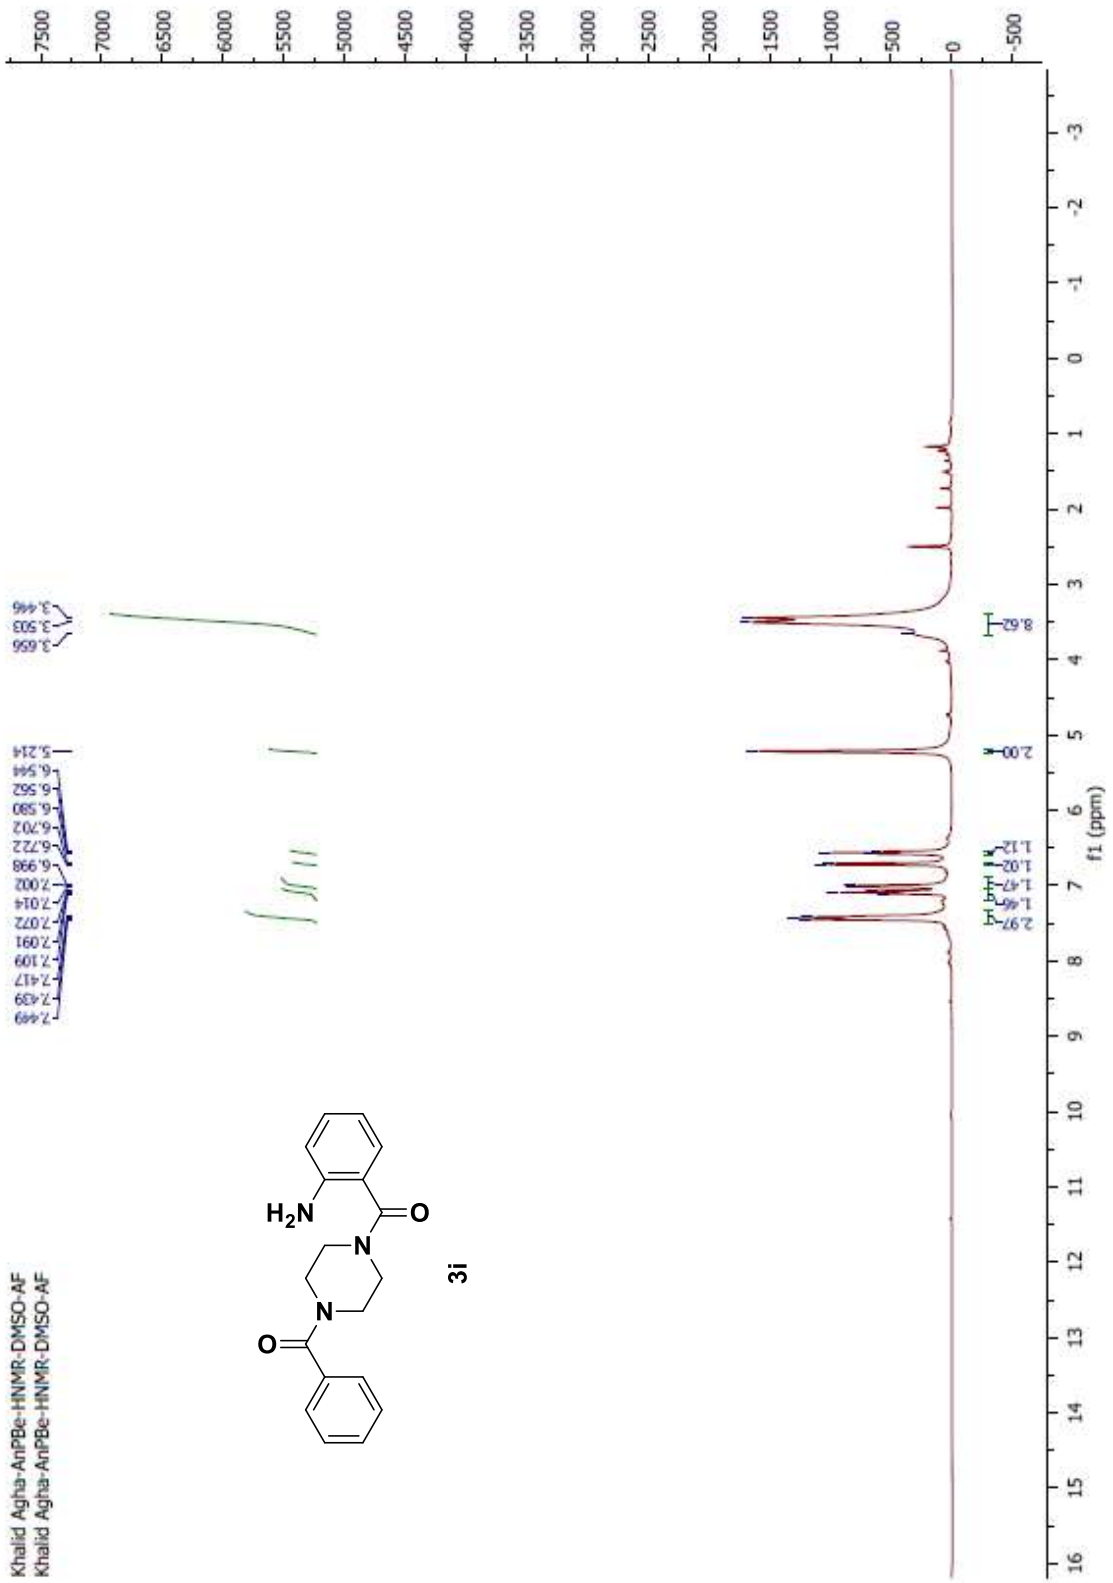



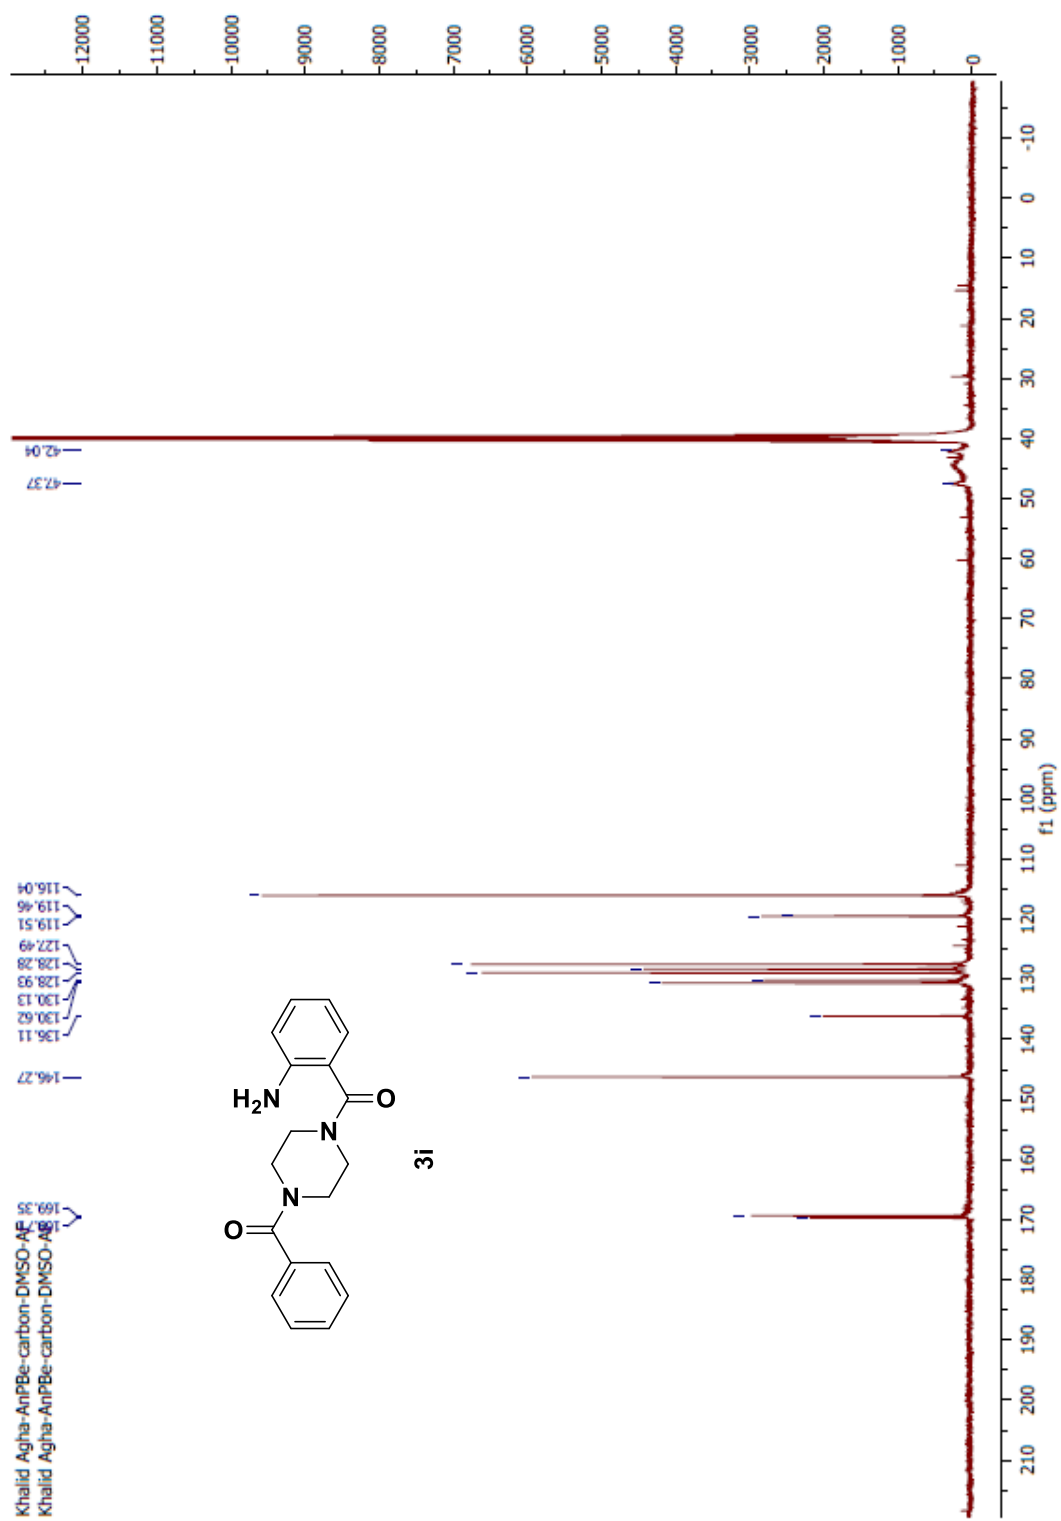

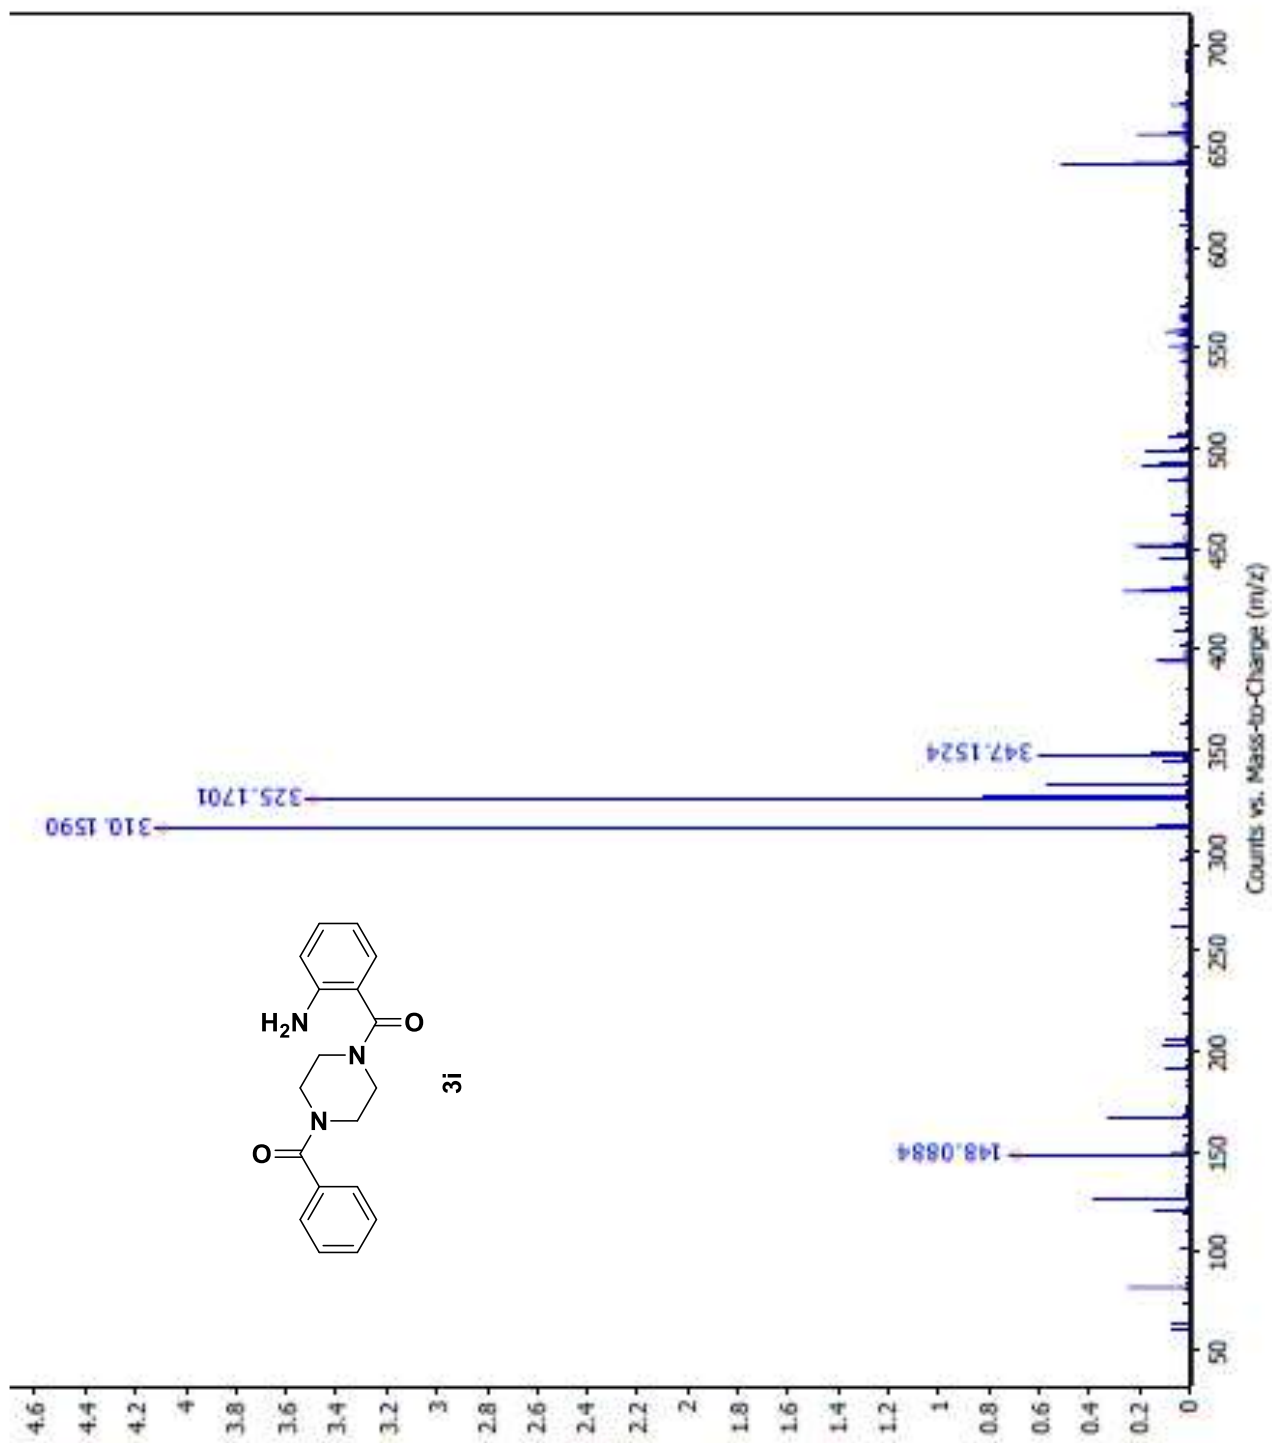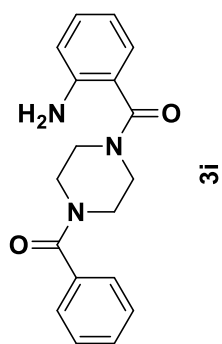

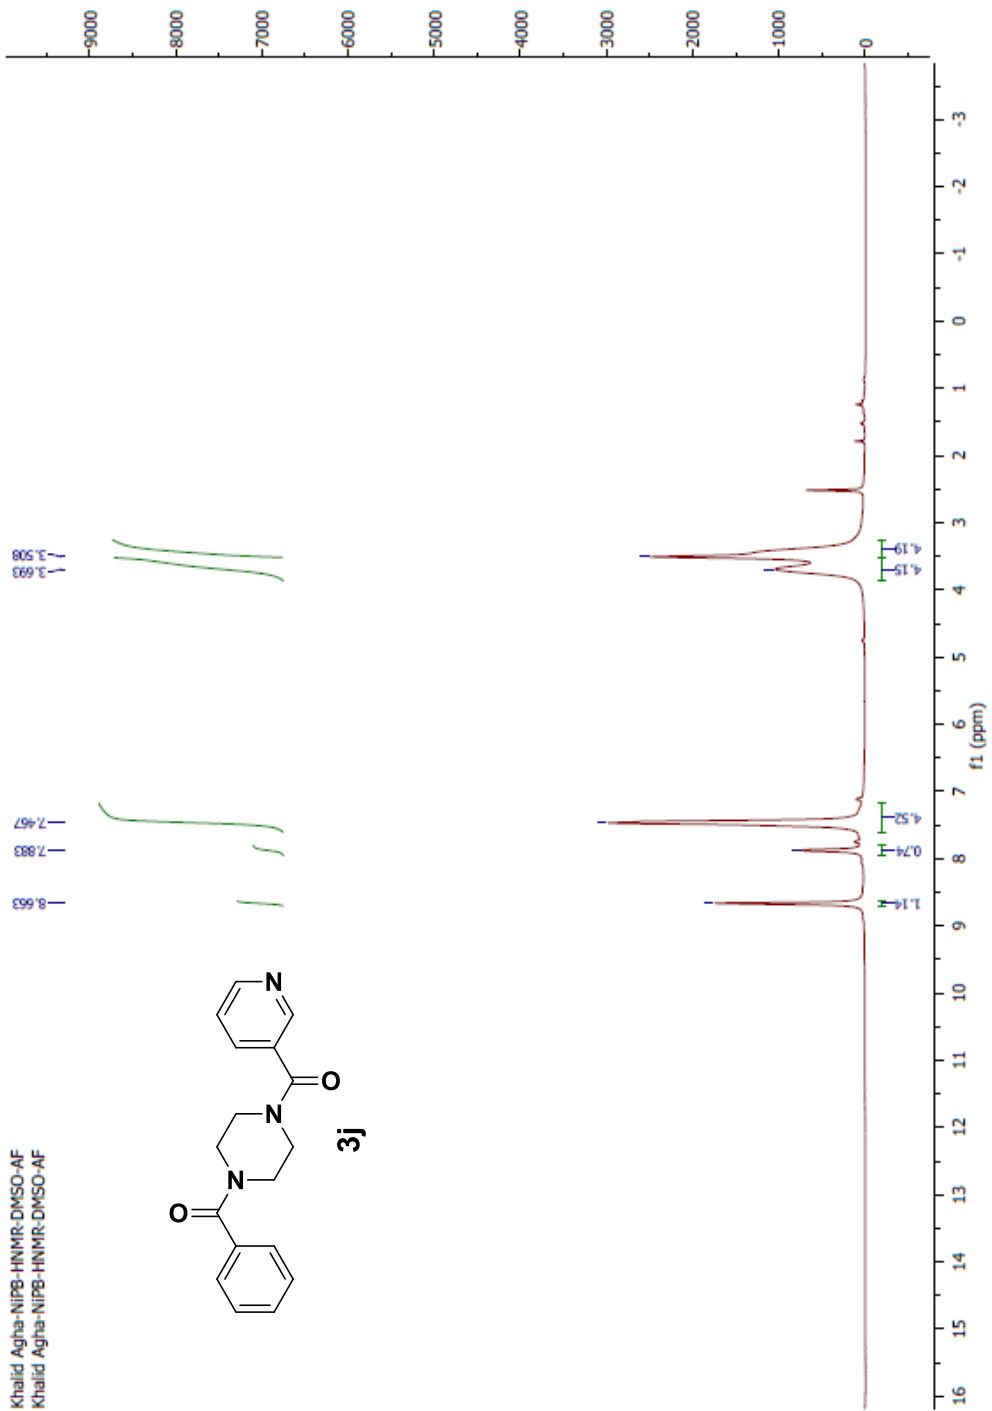

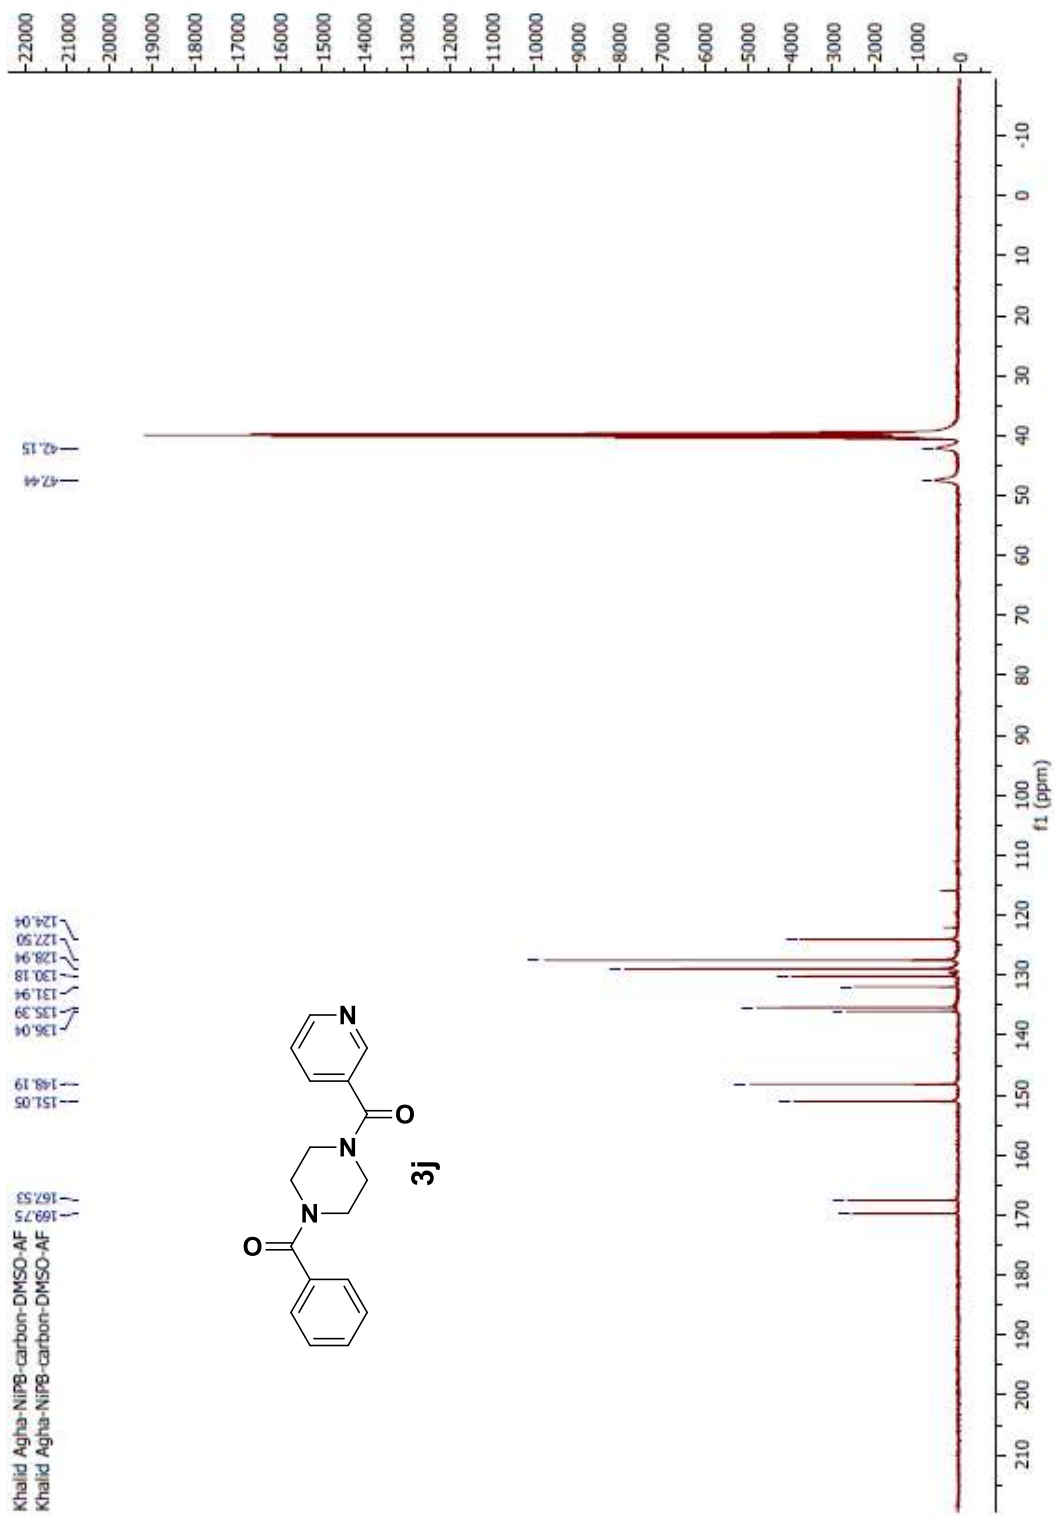

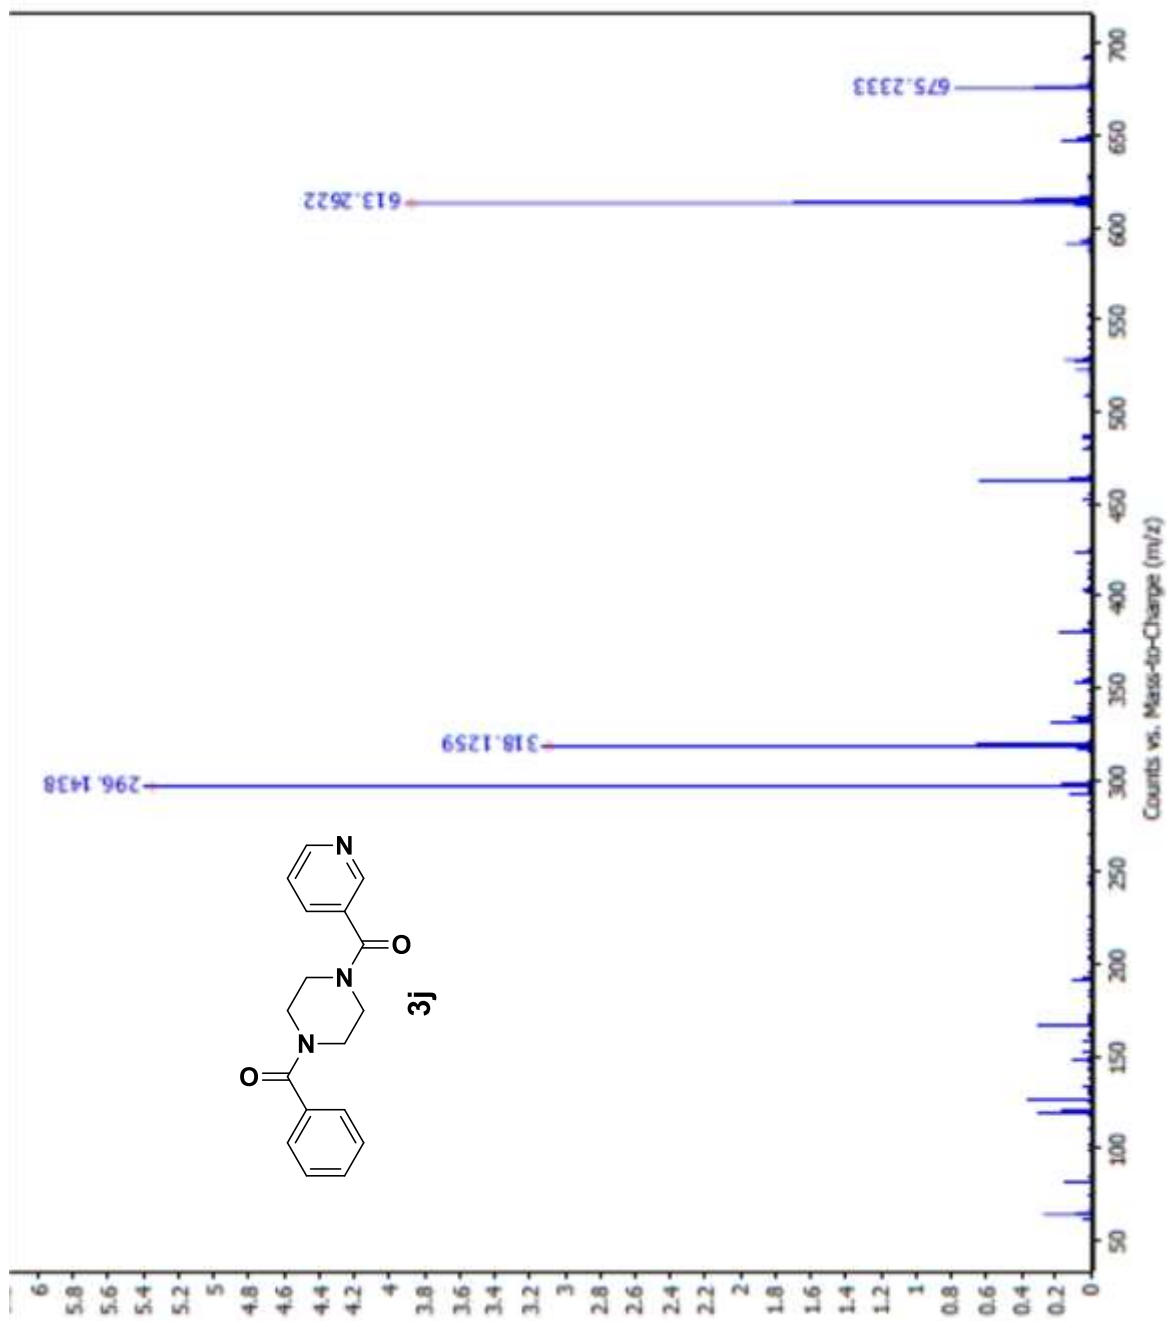

### **3. Pharmacological Screening**

#### **3.1 Cell Based Assay**

The following codes were used for target compounds during cell based assay.

| <b>Code</b> | <b>Target</b> |
|-------------|---------------|
| GPB         | 3c            |
| APB         | 3d            |
| VPB         | 3e            |
| MPB         | 3f            |
| PBB         | 3g            |
| PAP         | 3h            |
| ANP         | 3i            |
| NPB         | 3j            |
| DM235       | Sunifram (3a) |

#### **General**

Cell Line cells were obtained from American Type Culture Collection, cells were cultured using DMEM (Invitrogen/Life Technologies) supplemented with 10% FBS (Hyclone,), 10 ug/ml of insulin (Sigma), and 1% penicillin-streptomycin. All of the other chemicals and reagents were from Sigma, or Invitrogen. Plate cells (cells density  $1.2 - 1.8 \times 10,000$  cells/well) in a volume of 100 $\mu$ l complete growth medium + 100 ul of the tested compound per well in a 96-well plate for 24 hours before the MTT assay .

#### **Cell culture protocol**

1. Remove culture medium to a centrifuge tube.
2. Briefly rinse the cell layer with 0.25% (w/v) Trypsin 0.53 mM EDTA solution to remove all traces of serum which contains Trypsin inhibitor.
3. Add 2.0 to 3.0 ml of Trypsin EDTA solution to flask and observe cells under an inverted microscope until cell layer is dispersed (usually within 5 to 15 minutes).

Note: To avoid clumping do not agitate the cells by hitting or shaking the flask while waiting for the cells to detach. Cells that are difficult to detach may be placed at 37°C to facilitate dispersal.

4. Add 6.0 to 8.0 mL of complete growth medium and aspirate cells by gently pipetting.
5. Transfer the cell suspension to the centrifuge tube with the medium and cells from step 1, and centrifuge at approximately 125 xg for 5 to 10 minutes. Discard the supernatant.

6. Resuspend the cell pellet in fresh growth medium. Add appropriate aliquots of the cell suspension to new culture vessels.

7. Incubate cultures at 37°C for 24 hrs.

8-After treatment of cells with the serial concentrations of the compound to be tested incubation is carried out for 48 h at 37°C, then the plates are to be examined under the inverted microscope and proceed for the MTT assay.

### **3.1.1 MTT – Cytotoxicity assay protocol**

The MTT method of monitoring in vitro cytotoxicity is well suited for use with multiwell plates. For best results, cells in the log phase of growth should be employed and final cell number should not exceed 106 cells/cm<sup>2</sup>. Each test should include a blank containing complete medium without cells.

1. Remove cultures from incubator into laminar flow hood or other sterile work area.
2. Reconstitute each vial of MTT [M-5655] to be used with 3 ml of medium or balanced salt solution without phenol red and serum. Add reconstituted MTT in an amount equal to 10% of the culture medium volume.
3. Return cultures to incubator for 2-4 hours depending on cell type and maximum cell density. (An incubation period of 2 hours is generally adequate but may be lengthened for low cell densities or cells with lower metabolic activity.) Incubation times should be consistent when making comparisons.
4. After the incubation period, remove cultures from incubator and dissolve the resulting formazan crystals by adding an amount of MTT Solubilization Solution [M-8910] equal to the original culture medium volume.
5. Gentle mixing in a gyratory shaker will enhance dissolution. Occasionally, especially in dense cultures, pipetting up and down [trituration] may be required to completely dissolve the MTT formazan crystals.
6. Spectrophotometrically measure absorbance at a wavelength of 570 nm. Measure the background absorbance of multiwell plates at 690 nm and subtract from the 570 nm measurement. Tests performed in multiwell plates can be read using the appropriate type of plate reader or the contents of individual wells may be transferred to appropriate size cuvetts for spectrophotometric measurement.

## Detailed results

Dr.Khalid Agha

MTT

25-Jul

A549

|   | Blank | CC | Sample No. MPB/A549 |      |        |        |        | Sample No. APB/A549 |      |        |        |        |
|---|-------|----|---------------------|------|--------|--------|--------|---------------------|------|--------|--------|--------|
|   | 1     | 2  | 3                   | 4    | 5      | 6      | 7      | 8                   | 9    | 10     | 11     | 12     |
| A | B     | C  | 100uM               | 25uM | 6.25uM | 1.56uM | 0.39uM | 100uM               | 25uM | 6.25uM | 1.56uM | 0.39uM |
| B | B     | C  | 100uM               | 25uM | 6.25uM | 1.56uM | 0.39uM | 100uM               | 25uM | 6.25uM | 1.56uM | 0.39uM |
| C | B     | C  | 100uM               | 25uM | 6.25uM | 1.56uM | 0.39uM | 100uM               | 25uM | 6.25uM | 1.56uM | 0.39uM |

ROBONIK P2000 EIA READER

Wave length: 450 nm

Reference: 630 nm

|  | 1 | 2 | 3 | 4 | 5 | 6 | 7 | 8 | 9 | 10 | 11 | 12 |
|--|---|---|---|---|---|---|---|---|---|----|----|----|
|--|---|---|---|---|---|---|---|---|---|----|----|----|

|      |       |       |        |       |        |       |        |        |       |       |        |        |
|------|-------|-------|--------|-------|--------|-------|--------|--------|-------|-------|--------|--------|
| A    | 0.001 | 0.454 | 0.178  | 0.229 | 0.282  | 0.342 | 0.394  | 0.203  | 0.242 | 0.295 | 0.343  | 0.405  |
| B    | 0.001 | 0.433 | 0.183  | 0.234 | 0.278  | 0.336 | 0.399  | 0.215  | 0.254 | 0.284 | 0.361  | 0.416  |
| C    | 0.001 | 0.457 | 0.189  | 0.236 | 0.283  | 0.347 | 0.386  | 0.194  | 0.248 | 0.296 | 0.339  | 0.411  |
| mean | 4E-04 | 0.448 | 0.1833 | 0.233 | 0.281  | 0.342 | 0.393  | 0.204  | 0.248 | 0.292 | 0.3477 | 0.4107 |
| %    |       |       | 40.923 | 52.01 | 62.723 | 76.26 | 87.723 | 45.536 | 55.36 | 65.1  | 77.604 | 91.667 |

MPB/A549

| log conc. | % viability |
|-----------|-------------|
| 2         | 40.92       |
| 1.398     | 52.01       |
| 0.796     | 62.72       |
| 0.193     | 76.26       |
| -0.409    | 87.72       |

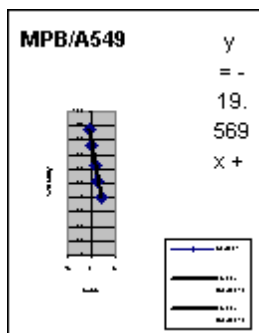

APB/A549

| log conc. | % viability |
|-----------|-------------|
| 2         | 45.54       |
| 1.3979    | 55.36       |
| 0.7959    | 65.1        |
| 0.1931    | 77.6        |
| -0.409    | 91.67       |

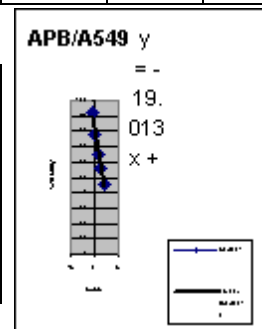

|   | Blank | CC | Sample No. ANP/A549 |      |        |        |        | Sample No. PPB/A549 |      |        |        |        |
|---|-------|----|---------------------|------|--------|--------|--------|---------------------|------|--------|--------|--------|
|   | 1     | 2  | 3                   | 4    | 5      | 6      | 7      | 8                   | 9    | 10     | 11     | 12     |
| A | B     | C  | 100uM               | 25uM | 6.25uM | 1.56uM | 0.39uM | 100uM               | 25uM | 6.25uM | 1.56uM | 0.39uM |
| B | B     | C  | 100ug               | 25uM | 6.25uM | 1.56uM | 0.39uM | 100uM               | 25uM | 6.25uM | 1.56uM | 0.39uM |
| C | B     | C  | 100ug               | 25uM | 6.25uM | 1.56uM | 0.39uM | 100uM               | 25uM | 6.25uM | 1.56uM | 0.39uM |

ROBONIK P2000 EIA READER

Wave length: 450 nm

Reference: 630 nm

|  | 1 | 2 | 3 | 4 | 5 | 6 | 7 | 8 | 9 | 10 | 11 | 12 |
|--|---|---|---|---|---|---|---|---|---|----|----|----|
|--|---|---|---|---|---|---|---|---|---|----|----|----|

|             |       |       |        |       |        |       |        |        |       |       |        |        |
|-------------|-------|-------|--------|-------|--------|-------|--------|--------|-------|-------|--------|--------|
| A           | 0.001 | 0.462 | 0.229  | 0.271 | 0.338  | 0.364 | 0.418  | 0.171  | 0.242 | 0.311 | 0.357  | 0.392  |
| B           | 0.001 | 0.454 | 0.218  | 0.267 | 0.325  | 0.363 | 0.427  | 0.179  | 0.238 | 0.306 | 0.352  | 0.388  |
| C           | 0.001 | 0.435 | 0.226  | 0.269 | 0.331  | 0.369 | 0.423  | 0.185  | 0.245 | 0.314 | 0.349  | 0.384  |
| mean        | 0.001 | 0.45  | 0.2243 | 0.269 | 0.3313 | 0.365 | 0.4227 | 0.1783 | 0.242 | 0.31  | 0.3527 | 0.388  |
| % viability |       |       | 49.815 | 59.73 | 73.575 | 81.13 | 93.856 | 39.6   | 53.66 | 68.91 | 78.312 | 86.158 |

ANP/A549

| log conc. | % viability |
|-----------|-------------|
| 2         | 49.815      |
| 1.398     | 59.73       |
| 0.796     | 73.575      |
| 0.193     | 81.13       |
| -0.409    | 93.856      |

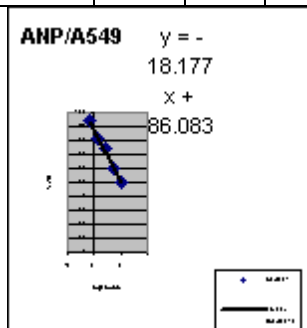

PPB/A549

| log conc. | % viability |
|-----------|-------------|
| 2         | 45.54       |
| 1.3979    | 55.36       |
| 0.7959    | 65.1        |
| 0.1931    | 77.6        |
| -0.409    | 91.67       |

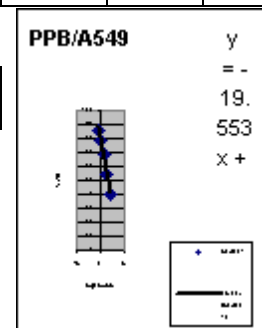



|        |       |
|--------|-------|
| 2      | 49.81 |
| 1.398  | 59.73 |
| 0.796  | 73.58 |
| 0.193  | 81.13 |
| -0.409 | 93.86 |

|        |       |
|--------|-------|
| 2      | 39.6  |
| 1.3979 | 53.66 |
| 0.7959 | 68.91 |
| 0.1931 | 78.31 |
| -0.409 | 86.16 |

|   | Blank | CC | Sample No. VPB/A549 |      |        |        |        | Sample No. GPB/A549 |      |        |        |        |
|---|-------|----|---------------------|------|--------|--------|--------|---------------------|------|--------|--------|--------|
|   | 1     | 2  | 3                   | 4    | 5      | 6      | 7      | 8                   | 9    | 10     | 11     | 12     |
| A | B     | C  | 100uM               | 25uM | 6.25uM | 1.56uM | 0.39uM | 100uM               | 25uM | 6.25uM | 1.56uM | 0.39uM |
| B | B     | C  | 100ug               | 25uM | 6.25uM | 1.56uM | 0.39uM | 100uM               | 25uM | 6.25uM | 1.56uM | 0.39uM |
| C | B     | C  | 100ug               | 25uM | 6.25uM | 1.56uM | 0.39uM | 100uM               | 25uM | 6.25uM | 1.56uM | 0.39uM |

ROBONIK P2000 EIA READER

Wave length: 450 nm

Reference: 630 nm

|             | 1     | 2     | 3      | 4     | 5      | 6     | 7      | 8      | 9     | 10    | 11     | 12     |
|-------------|-------|-------|--------|-------|--------|-------|--------|--------|-------|-------|--------|--------|
| A           | 0.001 | 0.475 | 0.213  | 0.261 | 0.298  | 0.342 | 0.398  | 0.229  | 0.282 | 0.342 | 0.394  | 0.447  |
| B           | 0.003 | 0.447 | 0.222  | 0.252 | 0.289  | 0.338 | 0.408  | 0.234  | 0.278 | 0.336 | 0.399  | 0.452  |
| C           | 0.001 | 0.461 | 0.208  | 0.254 | 0.297  | 0.336 | 0.401  | 0.236  | 0.283 | 0.347 | 0.386  | 0.443  |
| mean        | 0.002 | 0.461 | 0.2143 | 0.256 | 0.2947 | 0.339 | 0.4023 | 0.233  | 0.281 | 0.342 | 0.393  | 0.4473 |
| % viability |       |       | 46.493 | 55.46 | 63.919 | 73.46 | 87.274 | 50.542 | 60.95 | 74.11 | 85.249 | 97.035 |

VPB/A549

|        |       |
|--------|-------|
| 2      | 46.49 |
| 1.398  | 55.46 |
| 0.796  | 63.92 |
| 0.193  | 73.46 |
| -0.409 | 87.27 |

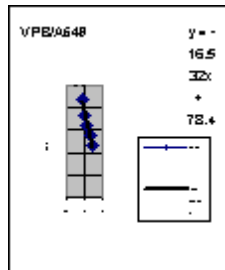

GPB/A549

|        |       |
|--------|-------|
| 2      | 50.54 |
| 1.3979 | 60.95 |
| 0.7959 | 74.11 |
| 0.1931 | 85.25 |
| -0.409 | 97.04 |

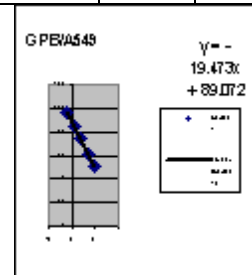

|   | Blank | CC | Sample No. PAP/A549 |      |        |        |        | Sample No. NPB/A549 |      |        |        |        |
|---|-------|----|---------------------|------|--------|--------|--------|---------------------|------|--------|--------|--------|
|   | 1     | 2  | 3                   | 4    | 5      | 6      | 7      | 8                   | 9    | 10     | 11     | 12     |
| A | B     | C  | 100uM               | 25uM | 6.25uM | 1.56uM | 0.39uM | 100uM               | 25uM | 6.25uM | 1.56uM | 0.39uM |
| B | B     | C  | 100ug               | 25uM | 6.25uM | 1.56uM | 0.39uM | 100uM               | 25uM | 6.25uM | 1.56uM | 0.39uM |
| C | B     | C  | 100ug               | 25uM | 6.25uM | 1.56uM | 0.39uM | 100uM               | 25uM | 6.25uM | 1.56uM | 0.39uM |

ROBONIK P2000 EIA READER

Wave length: 450 nm

Reference: 630 nm

|      | 1     | 2     | 3      | 4     | 5      | 6     | 7     | 8      | 9     | 10    | 11     | 12     |
|------|-------|-------|--------|-------|--------|-------|-------|--------|-------|-------|--------|--------|
| A    | 0.001 | 0.427 | 0.184  | 0.234 | 0.282  | 0.327 | 0.375 | 0.189  | 0.255 | 0.293 | 0.342  | 0.385  |
| B    | 0.001 | 0.432 | 0.193  | 0.239 | 0.289  | 0.335 | 0.376 | 0.201  | 0.263 | 0.294 | 0.347  | 0.392  |
| C    | 0.001 | 0.455 | 0.188  | 0.244 | 0.292  | 0.331 | 0.377 | 0.184  | 0.262 | 0.294 | 0.338  | 0.385  |
| mean | 0.001 | 0.438 | 0.1883 | 0.239 | 0.2877 | 0.331 | 0.376 | 0.1913 | 0.26  | 0.294 | 0.3423 | 0.3873 |

|             |  |        |       |        |       |        |        |       |       |        |        |
|-------------|--|--------|-------|--------|-------|--------|--------|-------|-------|--------|--------|
| % viability |  | 42.998 | 54.57 | 65.677 | 75.57 | 85.845 | 43.683 | 59.36 | 67.05 | 78.158 | 88.432 |
|-------------|--|--------|-------|--------|-------|--------|--------|-------|-------|--------|--------|

PAP/A549

| log conc. | % viability |
|-----------|-------------|
| 2         | 43          |
| 1.398     | 54.57       |
| 0.796     | 65.68       |
| 0.193     | 75.57       |
| -0.409    | 85.84       |

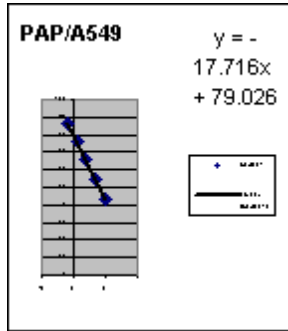

NPB/A549

| log conc. | % viability |
|-----------|-------------|
| 2         | 43.68       |
| 1.3979    | 59.36       |
| 0.7959    | 67.05       |
| 0.1931    | 78.16       |
| -0.409    | 88.43       |

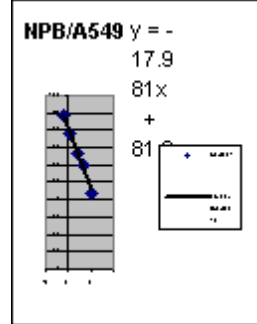

|   | Blank | CC | Sample No. DM235/A549 |      |        |        |        | Sample No. |   |    |    |    |
|---|-------|----|-----------------------|------|--------|--------|--------|------------|---|----|----|----|
|   | 1     | 2  | 3                     | 4    | 5      | 6      | 7      | 8          | 9 | 10 | 11 | 12 |
| A | B     | C  | 100uM                 | 25uM | 6.25uM | 1.56uM | 0.39uM |            |   |    |    |    |
| B | B     | C  | 100ug                 | 25uM | 6.25uM | 1.56uM | 0.39uM |            |   |    |    |    |
| C | B     | C  | 100ug                 | 25uM | 6.25uM | 1.56uM | 0.39uM |            |   |    |    |    |

ROBONIK P2000 EIA READER

Wave length: 450 nm

Reference: 630 nm

|  | 1 | 2 | 3 | 4 | 5 | 6 | 7 | 8 | 9 | 10 | 11 | 12 |
|--|---|---|---|---|---|---|---|---|---|----|----|----|
|--|---|---|---|---|---|---|---|---|---|----|----|----|

|             |       |       |        |       |        |       |        |   |   |   |   |   |
|-------------|-------|-------|--------|-------|--------|-------|--------|---|---|---|---|---|
| A           | 0.001 | 0.466 | 0.229  | 0.271 | 0.338  | 0.364 | 0.418  |   |   |   |   |   |
| B           | 0.003 | 0.439 | 0.218  | 0.267 | 0.325  | 0.363 | 0.427  |   |   |   |   |   |
| C           | 0.001 | 0.471 | 0.226  | 0.269 | 0.331  | 0.369 | 0.423  |   |   |   |   |   |
| mean        | 0.002 | 0.459 | 0.2243 | 0.269 | 0.3313 | 0.365 | 0.4227 | 0 | 0 | 0 | 0 | 0 |
| % viability |       |       | 48.91  | 58.65 | 72.238 | 79.65 | 92.151 | 0 | 0 | 0 | 0 | 0 |

DM235/A549

| log conc. | % viability |
|-----------|-------------|
| 2         | 48.91       |
| 1.398     | 58.65       |
| 0.796     | 72.24       |
| 0.193     | 79.65       |
| -0.409    | 92.15       |

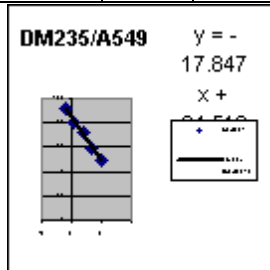

| log conc. | % viability |
|-----------|-------------|
| 2         | 0           |
| 1.3979    | 0           |
| 0.7959    | 0           |
| 0.1931    | 0           |
| -0.409    | 0           |

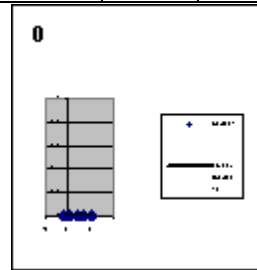

### 3.1.2 *In vitro* acetyl Choline release assay

The relative amount of ACh released in response to the synthesized Targets **3a** and **3c-j** was determined in A549 lung adenocarcinoma cells by Song et al protocol as follow:

1. A549 cells were grown in 5 ml serum-free RPMI (SF-RPMI) to 90 % confluence in 60 mm cell culture dishes in a cell culture incubator set at 5 % CO<sub>2</sub> and 37 °C
2. On the day of the assay, 100 µM neostigmine (a chemical inhibitor of AChE in cells) was added to each plate for four hours at 37 °C. The plate contained 3 ml of media.
3. Four hours after the addition of neostigmine, the relevant concentration of test compounds **3a** and **3c-j** (1/2 IC<sub>50</sub>) were added and the cells were incubated at 37 °C for 36 hrs.
4. The supernatant (medium) was collected and spun at 800 × g.
5. The supernatants were frozen at -80 °C and then lyophilized. The lyophilizer was set to a pressure of 10 micron Hg or below that value. The samples were lyophilized overnight.
6. Subsequently, the lyophilizate was reconstituted with 500 µl autoclaved distilled water, snap frozen in liquid nitrogen and stored at -80 °C for analysis.

The amount of ACh in the sample was measured using the Choline/acetylcholine Quantification Kit (BioVisio. Catalog #K615-100)

#### Detailed results

| Ach STANDARDS | Conc. Pg/ml |
|---------------|-------------|
| St.1          | 500         |
| St.2          | 400         |
| St.3          | 300         |
| St.4          | 200         |
| St.5          | 100         |

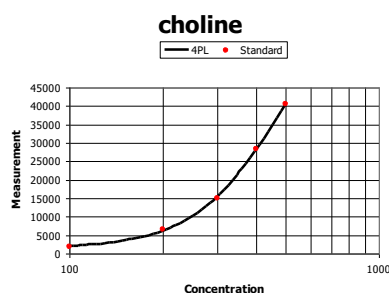

Plate map

|   | 1   | 2   | 3   | 4   | 5     | 6   | 7   | 8   | 9     | 10 | 11 | 12 |
|---|-----|-----|-----|-----|-------|-----|-----|-----|-------|----|----|----|
| A | st1 | MPB | ANP | GPB | DM235 | MPB | ANP | GPB | DM235 | -  | -  | -  |
| B | st2 | MPB | PPB | GPB | DM235 | MPB | PPB | GPB | DM235 | -  | -  | -  |
| C | st3 | MPB | PPB | PAP | DM235 | MPB | PPB | PAP | DM235 | -  | -  | -  |
| D | st4 | APB | PPB | PAP | cont  | APB | PPB | PAP | cont  | -  | -  | -  |
| E | st5 | APB | VPB | PAP | cont  | APB | VPB | PAP | cont  | -  | -  | -  |
| F | st0 | APB | VPB | NPB | cont  | APB | VPB | NPB | cont  | -  | -  | -  |
| G | B   | ANP | VPB | NPB | -     | ANP | VPB | NPB | -     | -  | -  | -  |

| H                                | B     | ANP   | GPB   | NPB   | -     | ANP                | GPB   | NPB   | -     | -  | -  | -  |
|----------------------------------|-------|-------|-------|-------|-------|--------------------|-------|-------|-------|----|----|----|
| Samples OD results Total (+ACHE) |       |       |       |       |       | Free(+neostagmine) |       |       |       |    |    |    |
|                                  | 1     | 2     | 3     | 4     | 5     | 6                  | 7     | 8     | 9     | 10 | 11 | 12 |
| A                                | 40895 | 26942 | 22154 | 29262 | 29182 | 8136               | 9913  | 18155 | 11261 | 0  | 0  | 0  |
| B                                | 28736 | 29161 | 24362 | 28356 | 28743 | 8307               | 14572 | 18436 | 11554 | 0  | 0  | 0  |
| C                                | 15471 | 28413 | 26139 | 26935 | 28519 | 7992               | 15191 | 13056 | 11359 | 0  | 0  | 0  |
| D                                | 6944  | 25861 | 24941 | 21773 | 17642 | 9421               | 14757 | 12814 | 11459 | 0  | 0  | 0  |
| E                                | 2316  | 25918 | 26829 | 22248 | 18091 | 9197               | 17132 | 13461 | 11913 | 0  | 0  | 0  |
| F                                | 612   | 24796 | 27914 | 20157 | 17784 | 9318               | 16328 | 9463  | 10118 | 0  | 0  | 0  |
| G                                | 322   | 22753 | 25775 | 19554 | 0     | 9642               | 16819 | 9921  | 0     | 0  | 0  | 0  |
| H                                | 249   | 21667 | 28136 | 18943 | 0     | 9755               | 18316 | 9704  | 0     | 0  | 0  | 0  |

| Calibrator | Wells | Conc. | Raw (Corrected) | Backfit | Recovery % |
|------------|-------|-------|-----------------|---------|------------|
| Standard1  | A1    | 500   | 40500           | 499.4   | 99.88      |
| Standard2  | B1    | 400   | 28300           | 401.9   | 100.5      |
| Standard3  | C1    | 300   | 15100           | 296.6   | 98.86      |
| Standard4  | D1    | 200   | 6550            | 205.3   | 102.7      |
| Standard5  | E1    | 100   | 1920            | 91.1    | 91.1       |

| Sample     | Wells | Raw   | Background Corrected | Conc. | Conc. (Average) | %CV   | SD   | SEM  |
|------------|-------|-------|----------------------|-------|-----------------|-------|------|------|
| Control1-T | D5    | 17600 | 17400                | 315.1 | 316.7           | 0.601 | 1.9  | 1.1  |
|            | E5    | 18100 |                      | 318.8 |                 |       |      |      |
|            | F5    | 17800 |                      | 316.3 |                 |       |      |      |
| Control-F  | D9    | 11500 | 10800                | 258.9 | 255.7           | 3.83  | 9.78 | 5.65 |
|            | E9    | 11900 |                      | 263.4 |                 |       |      |      |
|            | F9    | 10100 |                      | 244.7 |                 |       |      |      |
| MPB (T)    | A2    | 26900 | 27800                | 388.2 | 397.6           | 2.17  | 8.62 | 4.98 |
|            | B2    | 29200 |                      | 405.1 |                 |       |      |      |
|            | C2    | 28400 |                      | 399.4 |                 |       |      |      |
| APB (T)    | D2    | 25900 | 25100                | 379.9 | 377.4           | 1.28  | 4.84 | 2.79 |
|            | E2    | 25900 |                      | 380.4 |                 |       |      |      |
|            | F2    | 24800 |                      | 371.8 |                 |       |      |      |
| ANP (T)    | A3    | 22200 | 21800                | 351.4 | 351.6           | 1.21  | 4.24 | 2.45 |
|            | G2    | 22800 |                      | 356   |                 |       |      |      |
|            | H2    | 21700 |                      | 347.5 |                 |       |      |      |
| PPB (T)    | B3    | 24400 | 24800                | 368.4 | 374.5           | 1.85  | 6.94 | 4.01 |
|            | C3    | 26100 |                      | 382.1 |                 |       |      |      |
|            | D3    | 24900 |                      | 372.9 |                 |       |      |      |
| VPB (T)    | E3    | 26800 | 26400                | 387.3 | 387.4           | 2.11  | 8.17 | 4.72 |
|            | F3    | 27900 |                      | 395.6 |                 |       |      |      |
|            | G3    | 25800 |                      | 379.3 |                 |       |      |      |
| GPB (T)    | A4    | 29300 | 28200                | 405.9 | 400.7           | 1.14  | 4.56 | 2.63 |
|            | B4    | 28400 |                      | 399   |                 |       |      |      |
|            | H3    | 28100 |                      | 397.3 |                 |       |      |      |

|                |    |       |       |         |       |       |      |       |
|----------------|----|-------|-------|---------|-------|-------|------|-------|
| PAP (T)        | C4 | 26900 | 23300 | 388.1   | 362.9 | 6.05  | 22   | 12.7  |
|                | D4 | 21800 |       | 348.4   |       |       |      |       |
|                | E4 | 22200 |       | 352.1   |       |       |      |       |
| NPB (T)        | F4 | 20200 | 19200 | 335.6   | 330.7 | 1.48  | 4.89 | 2.82  |
|                | G4 | 19600 |       | 330.8   |       |       |      |       |
|                | H4 | 18900 |       | 325.8   |       |       |      |       |
| DM235(Ref) (T) | A5 | 29200 | 28400 | 405.3   | 402.5 | 0.641 | 2.58 | 1.49  |
|                | B5 | 28700 |       | 401.9   |       |       |      |       |
|                | C5 | 28500 |       | 400.2   |       |       |      |       |
| MPB (F)        | A6 | 8140  | 7750  | 221.4   | 221.5 | 0.903 | 2    | 1.15  |
|                | B6 | 8310  |       | 223.5   |       |       |      |       |
|                | C6 | 7990  |       | 219.5   |       |       |      |       |
| APB (F)        | D6 | 9420  | 8920  | 236.9   | 235.6 | 0.551 | 1.3  | 0.75  |
|                | E6 | 9200  |       | 234.3   |       |       |      |       |
|                | F6 | 9320  |       | 235.7   |       |       |      |       |
| ANP (F)        | A7 | 9910  | 9380  | 242.4   | 240.8 | 0.634 | 1.53 | 0.882 |
|                | G6 | 9640  |       | 239.4   |       |       |      |       |
|                | H6 | 9760  |       | 240.6   |       |       |      |       |
| PPB (F)        | B7 | 14600 | 14400 | 288.6   | 291   | 0.974 | 2.83 | 1.64  |
|                | C7 | 15200 |       | 294.1   |       |       |      |       |
|                | D7 | 14800 |       | 290.2   |       |       |      |       |
| VPB (F)        | E7 | 17100 | 16400 | 310.8   | 307.7 | 1.12  | 3.44 | 1.99  |
|                | F7 | 16300 |       | 304     |       |       |      |       |
|                | G7 | 16800 |       | 308.2   |       |       |      |       |
| GPB (F)        | A8 | 18200 | 17900 | 319.4   | 320.6 | 0.362 | 1.16 | 0.67  |
|                | B8 | 18400 |       | 321.7   |       |       |      |       |
|                | H7 | 18300 |       | 320.7   |       |       |      |       |
| PAP (F)        | C8 | 13100 | 12700 | 274.6   | 275.1 | 1.13  | 3.1  | 1.79  |
|                | D8 | 12800 |       | 272.3   |       |       |      |       |
|                | E8 | 13500 |       | 278.4   |       |       |      |       |
| NPB (F)        | F8 | 9460  | 9300  | 237.3   | 240   | 1.08  | 2.59 | 1.49  |
|                | G8 | 9920  |       | 242.5   |       |       |      |       |
|                | H8 | 9700  |       | 240.1   |       |       |      |       |
| DM235(Ref) (F) | A9 | 11300 | 11000 | 256.8   | 258.2 | 0.591 | 1.52 | 0.88  |
|                | B9 | 11600 |       | 259.8   |       |       |      |       |
|                | C9 | 11400 |       | 257.8   |       |       |      |       |
| Blank          | F1 | 612   | 0     | < Curve | -     | -     | -    | -     |
|                | G1 | 322   |       | < Curve |       |       |      |       |
|                | H1 | 249   |       | < Curve |       |       |      |       |

|        | choine |       |       |  |          |    |
|--------|--------|-------|-------|--|----------|----|
| sample | Total  | Free  | ACH   |  | %        | EC |
| MPB    | 397.6  | 221.5 | 176.1 |  | 2.886885 | 61 |
| APB    | 377.4  | 235.6 | 141.8 |  | 2.32459  | 61 |
| ANP    | 351.6  | 240.8 | 110.8 |  | 1.816393 | 61 |
| PPB    | 374.5  | 291   | 83.5  |  | 1.368852 | 61 |

|            |       |       |       |  |          |    |
|------------|-------|-------|-------|--|----------|----|
| VPB        | 387.4 | 307.7 | 79.7  |  | 1.306557 | 61 |
| GPB        | 400.7 | 320.6 | 80.1  |  | 1.313115 | 61 |
| PAP        | 362.9 | 275.1 | 87.8  |  | 1.439344 | 61 |
| NPB        | 330.7 | 240   | 90.7  |  | 1.486885 | 61 |
| DM235(Ref) | 402.5 | 258.2 | 144.3 |  | 2.365574 | 61 |
| control    | 316.7 | 255.7 | 61    |  | 1        | 61 |

### 3.2 *In vitro* AChE inhibition assay.

All chemicals required for the AChE inhibition assay were obtained from Sigma-Aldrich. The assay was performed according to Ellman's method.

### 3.3 *Ex-vivo* AChE inhibition assay (for target 3f)

#### Detailed results

| s  | Group    | code | WT  | dose ug/kg | Rat Brain  |
|----|----------|------|-----|------------|------------|
|    |          |      |     |            | ACHE ng/ml |
| 1  | control  | 1c   | 172 | ---        | 2.148      |
| 2  |          | 2c   | 155 |            | 2.778      |
| 3  |          | 3c   | 203 |            | 2.31       |
| 4  |          | 4c   | 169 |            | 2.847      |
| 5  |          | 5c   | 156 |            | 2.406      |
| 6  | MPB (3f) | 1s   | 218 | 10         | 1.39       |
| 7  |          | 2s   | 167 |            | 1.297      |
| 8  |          | 3s   | 188 |            | 1.196      |
| 9  |          | 4s   | 175 |            | 1.339      |
| 10 |          | 5s   | 184 |            | 1.107      |
| 11 | Tacrine  | 1r   | 169 | 10         | 1.237      |
| 12 |          | 2r   | 176 |            | 1.108      |
| 13 |          | 3r   | 181 |            | 1.069      |
| 14 |          | 4r   | 206 |            | 1.115      |
| 15 |          | 5r   | 186 |            | 1.157      |

| ACHE st | ng/ml |
|---------|-------|
| st1     | 25    |
| st2     | 12.5  |
| st3     | 6.25  |
| st4     | 3.13  |
| st5     | 1.56  |
| st6     | 0.78  |

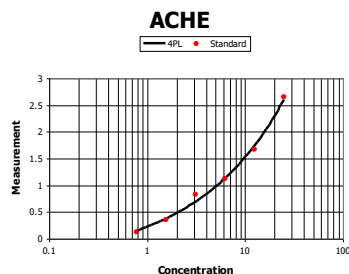

|   | 1   | 2  | 3  | 4  | 5  | 6  | 7  | 8  | 9  | 10 | 11 | 12 |
|---|-----|----|----|----|----|----|----|----|----|----|----|----|
| A | st1 | 1c | 5c | 4s | 3r | -- | -- | -- | -- | -- | -- | -- |
| B | st2 | 1c | 5c | 4s | 3r | -- | -- | -- | -- | -- | -- | -- |
| C | st3 | 2c | 1s | 5s | 4r | -- | -- | -- | -- | -- | -- | -- |
| D | st4 | 2c | 1s | 5s | 4r | -- | -- | -- | -- | -- | -- | -- |

|   |     |    |    |    |    |    |    |    |    |    |    |    |
|---|-----|----|----|----|----|----|----|----|----|----|----|----|
| E | st5 | 3c | 2s | 1r | 5r | -- | -- | -- | -- | -- | -- | -- |
| F | st6 | 3c | 2s | 1r | 5r | -- | -- | -- | -- | -- | -- | -- |
| G | B   | 4c | 3s | 2r | -- | -- | -- | -- | -- | -- | -- | -- |
| H | B   | 4c | 3s | 2r | -- | -- | -- | -- | -- | -- | -- | -- |

|   |       |       |       |       |       |   |   |   |   |    |    |    |
|---|-------|-------|-------|-------|-------|---|---|---|---|----|----|----|
|   | 1     | 2     | 3     | 4     | 5     | 6 | 7 | 8 | 9 | 10 | 11 | 12 |
| A | 2.664 | 0.543 | 0.594 | 0.338 | 0.257 | 0 | 0 | 0 | 0 | 0  | 0  | 0  |
| B | 1.685 | 0.522 | 0.575 | 0.351 | 0.281 | 0 | 0 | 0 | 0 | 0  | 0  | 0  |
| C | 1.139 | 0.661 | 0.364 | 0.268 | 0.273 | 0 | 0 | 0 | 0 | 0  | 0  | 0  |
| D | 0.842 | 0.648 | 0.352 | 0.292 | 0.292 | 0 | 0 | 0 | 0 | 0  | 0  | 0  |
| E | 0.371 | 0.572 | 0.339 | 0.323 | 0.304 | 0 | 0 | 0 | 0 | 0  | 0  | 0  |
| F | 0.145 | 0.559 | 0.328 | 0.311 | 0.285 | 0 | 0 | 0 | 0 | 0  | 0  | 0  |
| G | 0.018 | 0.671 | 0.295 | 0.288 | 0     | 0 | 0 | 0 | 0 | 0  | 0  | 0  |
| H | 0.024 | 0.663 | 0.316 | 0.273 | 0     | 0 | 0 | 0 | 0 | 0  | 0  | 0  |

| Calibrator | Wells | Conc.  | Raw (Corrected) | Backfit | Recovery % |
|------------|-------|--------|-----------------|---------|------------|
| Standard1  | A1    | 25     | 2.64            | 25.63   | 102.5      |
| Standard2  | B1    | 12.5   | 1.66            | 11.5    | 92.03      |
| Standard3  | C1    | 6.25   | 1.12            | 6.114   | 97.82      |
| Standard4  | D1    | 3.125  | 0.821           | 3.91    | 125.1      |
| Standard5  | E1    | 1.563  | 0.35            | 1.441   | 92.21      |
| Standard6  | F1    | 0.7813 | 0.124           | 0.6929  | 88.69      |

| Sample | Wells | Raw   | Background Corrected | Conc. | Conc. (Average) | %CV  | SD     | SEM    |
|--------|-------|-------|----------------------|-------|-----------------|------|--------|--------|
| 1c     | A2    | 0.543 | 0.512                | 2.198 | 2.148           | 3.34 | 0.0716 | 0.0507 |
|        | B2    | 0.522 |                      | 2.097 |                 |      |        |        |
| 2c     | C2    | 0.661 | 0.634                | 2.813 | 2.778           | 1.82 | 0.0506 | 0.0358 |
|        | D2    | 0.648 |                      | 2.742 |                 |      |        |        |
| 3c     | E2    | 0.572 | 0.545                | 2.342 | 2.31            | 1.99 | 0.046  | 0.0326 |
|        | F2    | 0.559 |                      | 2.277 |                 |      |        |        |
| 4c     | G2    | 0.671 | 0.646                | 2.869 | 2.847           | 1.11 | 0.0316 | 0.0223 |
|        | H2    | 0.663 |                      | 2.825 |                 |      |        |        |
| 5c     | A3    | 0.594 | 0.563                | 2.455 | 2.406           | 2.86 | 0.0687 | 0.0486 |
|        | B3    | 0.575 |                      | 2.357 |                 |      |        |        |
| 1s     | C3    | 0.364 | 0.337                | 1.413 | 1.39            | 2.35 | 0.0327 | 0.0231 |
|        | D3    | 0.352 |                      | 1.367 |                 |      |        |        |
| 2s     | E3    | 0.339 | 0.313                | 1.318 | 1.297           | 2.23 | 0.0289 | 0.0205 |
|        | F3    | 0.328 |                      | 1.277 |                 |      |        |        |
| 3s     | G3    | 0.295 | 0.285                | 1.158 | 1.196           | 4.43 | 0.053  | 0.0375 |
|        | H3    | 0.316 |                      | 1.233 |                 |      |        |        |
| 4s     | A4    | 0.338 | 0.324                | 1.314 | 1.339           | 2.6  | 0.0348 | 0.0246 |
|        | B4    | 0.351 |                      | 1.363 |                 |      |        |        |
| 5s     | C4    | 0.268 | 0.259                | 1.065 | 1.107           | 5.26 | 0.0582 | 0.0411 |
|        | D4    | 0.292 |                      | 1.148 |                 |      |        |        |

|       |    |       |       |        |        |      |         |        |
|-------|----|-------|-------|--------|--------|------|---------|--------|
| 1r    | E4 | 0.323 | 0.296 | 1.259  | 1.237  | 2.49 | 0.0308  | 0.0218 |
|       | F4 | 0.311 |       | 1.215  |        |      |         |        |
| 2r    | G4 | 0.288 | 0.259 | 1.134  | 1.108  | 3.28 | 0.0364  | 0.0257 |
|       | H4 | 0.273 |       | 1.082  |        |      |         |        |
| 3r    | A5 | 0.257 | 0.248 | 1.029  | 1.069  | 5.35 | 0.0572  | 0.0404 |
|       | B5 | 0.281 |       | 1.11   |        |      |         |        |
| 4r    | C5 | 0.273 | 0.261 | 1.082  | 1.115  | 4.15 | 0.0462  | 0.0327 |
|       | D5 | 0.292 |       | 1.148  |        |      |         |        |
| 5r    | E5 | 0.304 | 0.273 | 1.19   | 1.157  | 4.07 | 0.0471  | 0.0333 |
|       | F5 | 0.285 |       | 1.123  |        |      |         |        |
| Blank | G1 | 0.018 | 0     | 0.3938 | 0.3999 | 2.16 | 0.00862 | 0.0061 |
|       | H1 | 0.024 |       | 0.406  |        |      |         |        |



**In vitro hepatotoxicity screening**

researcher  
Dr.Khaled Agha

assay  
MTT

Date  
03-Mar

cells

THLE2

|   | Blank | CC | Sample No. 3F/THLE2 |      |       |       |       | Sample No. 3i/THLE2 |      |       |       |       |
|---|-------|----|---------------------|------|-------|-------|-------|---------------------|------|-------|-------|-------|
|   | 1     | 2  | 3                   | 4    | 5     | 6     | 7     | 8                   | 9    | 10    | 11    | 12    |
| A | B     | C  | 100ug               | 25ug | 6.3ug | 1.6ug | 0.4ug | 100ug               | 25ug | 6.3ug | 1.6ug | 0.4ug |
| B | B     | C  | 100ug               | 25ug | 6.3ug | 1.6ug | 0.4ug | 100ug               | 25ug | 6.3ug | 1.6ug | 0.4ug |
| C | B     | C  | 100ug               | 25ug | 6.3ug | 1.6ug | 0.4ug | 100ug               | 25ug | 6.3ug | 1.6ug | 0.4ug |

ROBONIK P2000 Eia reader

Wave length: 450 nm

Reference: 630 nm

|      | 1     | 2     | 3     | 4      | 5      | 6      | 7      | 8      | 9     | 10     | 11     | 12    |
|------|-------|-------|-------|--------|--------|--------|--------|--------|-------|--------|--------|-------|
| A    | 0.001 | 0.539 | 0.244 | 0.292  | 0.352  | 0.389  | 0.442  | 0.243  | 0.275 | 0.319  | 0.355  | 0.418 |
| B    | 0.001 | 0.554 | 0.235 | 0.303  | 0.349  | 0.393  | 0.439  | 0.257  | 0.269 | 0.321  | 0.357  | 0.405 |
| C    | 0.001 | 0.567 | 0.239 | 0.292  | 0.355  | 0.397  | 0.441  | 0.229  | 0.278 | 0.325  | 0.346  | 0.424 |
| mean | 0.001 | 0.553 | 0.239 | 0.2957 | 0.352  | 0.393  | 0.4407 | 0.243  | 0.274 | 0.3217 | 0.3527 | 0.416 |
| %    |       |       | 43.25 | 53.434 | 63.614 | 71.024 | 79.639 | 43.916 | 49.52 | 58.133 | 63.735 | 75.12 |

3F/THLE2

| log conc. | % viability |
|-----------|-------------|
| 2         | 43.25       |
| 1.398     | 53.43       |
| 0.796     | 63.61       |
| 0.193     | 71.02       |
| -0.409    | 79.64       |

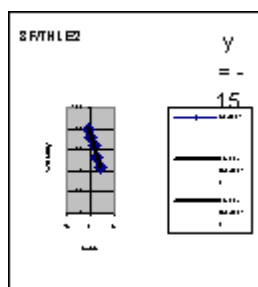

IC50=

3i/THLE2

| log conc. | % viability |
|-----------|-------------|
| 2         | 43.92       |
| 1.3979    | 49.52       |
| 0.7959    | 58.13       |
| 0.1931    | 63.73       |
| -0.409    | 75.12       |

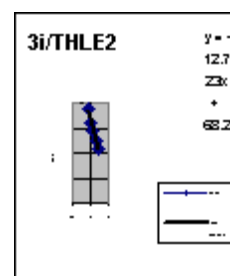

IC50=

|   | Blank | CC | Sample No. STA/THLE2 |      |       |       |       | Sample No. |   |    |    |    |
|---|-------|----|----------------------|------|-------|-------|-------|------------|---|----|----|----|
|   | 1     | 2  | 3                    | 4    | 5     | 6     | 7     | 8          | 9 | 10 | 11 | 12 |
| A | B     | C  | 100ug                | 25ug | 6.3ug | 1.6ug | 0.4ug |            |   |    |    |    |
| B | B     | C  | 100ug                | 25ug | 6.3ug | 1.6ug | 0.4ug |            |   |    |    |    |
| C | B     | C  | 100ug                | 25ug | 6.3ug | 1.6ug | 0.4ug |            |   |    |    |    |

ROBONIK P2000 Eia reader

Wave length: 450 nm

Reference: 630 nm

|  |   |   |   |   |   |   |   |   |   |    |    |    |
|--|---|---|---|---|---|---|---|---|---|----|----|----|
|  | 1 | 2 | 3 | 4 | 5 | 6 | 7 | 8 | 9 | 10 | 11 | 12 |
|--|---|---|---|---|---|---|---|---|---|----|----|----|

|             |       |       |       |        |        |        |        |   |   |   |   |   |
|-------------|-------|-------|-------|--------|--------|--------|--------|---|---|---|---|---|
| A           | 0.001 | 0.543 | 0.225 | 0.264  | 0.306  | 0.352  | 0.388  |   |   |   |   |   |
| B           | 0.001 | 0.525 | 0.231 | 0.271  | 0.302  | 0.344  | 0.389  |   |   |   |   |   |
| C           | 0.001 | 0.539 | 0.219 | 0.269  | 0.292  | 0.349  | 0.384  |   |   |   |   |   |
| mean        | 0.001 | 0.536 | 0.225 | 0.268  | 0.3    | 0.3483 | 0.387  | 0 | 0 | 0 | 0 | 0 |
| % viability |       |       | 42    | 50.031 | 56.005 | 65.028 | 72.246 | 0 | 0 | 0 | 0 | 0 |

STA/THLE2

| log conc. | % viability |
|-----------|-------------|
| 2         | 42          |
| 1.398     | 50.03       |
| 0.796     | 56          |
| 0.193     | 65.03       |
| -0.409    | 72.25       |

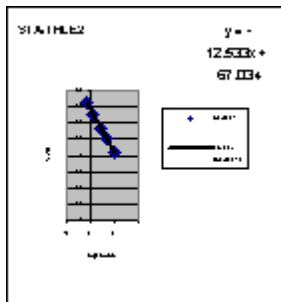

IC50=

| log conc. | % viability |
|-----------|-------------|
| 2         | 0           |
| 1.3979    | 0           |
| 0.7959    | 0           |
| 0.1931    | 0           |
| -0.409    | 0           |

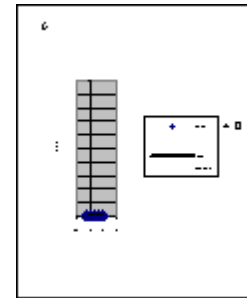

IC50=

## References

- [1] D. Ramírez. Computational Methods Applied to Rational Drug Design. *Open Med. Chem. J.* **2016**, 10, 7–20.
- [2] A. M. Dar, S. Mir. Molecular Docking: Approaches, Types, Applications and Basic Challenges. *J. Anal. Bioanal. Tech.* **2017**, 8, 356.
- [3] A. Das, S. Bhattacharya. Different Types of Molecular Docking Based on Variations of Interacting Molecules: Variations of Molecular Docking. in *Methods and Algorithms for Molecular Docking-Based Drug Design and Discovery*. **2016**, 148–172.
- [4] E. F. Pettersen, T. D. Goddard, C. C. Huang, G. S. Couch, D. M. Greenblatt, E. C. Meng, T. E. Ferrin. UCSF Chimera - A visualization system for exploratory research and analysis. *J. Comput. Chem.* **2004**, 25, 1605–1612.
- [5] Z. Wang, H. Sun, X. Yao, D. Li, L. Xu, Y. Li, S. Tian, T. Hou. Comprehensive Evaluation of Ten Docking Programs on a Diverse Set of Protein. *Phys. Chem. Chem. Phys.* **2016**, 18, 12964.
- [6] S. Kusumaningrum, E. Budianto, S. Kosela, W. Sumaryono, F. Juniarti, The molecular docking of 1,4-naphthoquinone derivatives as inhibitors of Polo-like kinase 1 using Molegro Virtual Docker. *J. Appl. Pharm. Sci.* **2014**, 4, 47–53.
- [7] ChemAxon. Marvin Sketch. 2013.
- [8] M. D. Hanwell, D. E. Curtis, D. C. Lonie, T. Vandermeersch, E. Zurek, G. R. Hutchison. Avogadro: an advanced semantic chemical editor, visualization, and analysis platform. *J. Cheminformatics*, **2012**, 4:17.
- [9] G. M. Morris, D. S. Goodsell, M. E. Pique, W. Lindstrom, R. Huey, S. Forli, W. E. Hart, S. Halliday, R. Belew, A. J. Olson. AutoDock Version 4.2. *User Guid.* 2009, 1–49.
- [10] A. Daina, O. Michielin, V. Zoete, SwissADME: A free web tool to evaluate pharmacokinetics, drug-likeness and medicinal chemistry friendliness of small molecules. *Sci. Rep.* **2017**, 7.
- [11] Case, D. A. *et al.* Amber 18. **2018**.
- [12] J. A. Maier, C. Martinez, K. Kasavajhala, L. Wickstrom, K. E. Hauser, C. Simmerling. ff14SB: Improving the Accuracy of Protein Side Chain and Backbone Parameters from ff99SB. *J. Chem. Theory Comput.* **2015**, 11, 3696–3713.
- [13] H. J. C. Berendsen, J. P. M. Postma, W. F. van Gunsteren, D. DiNola, J. R. Haak. Molecular dynamics with coupling to an external bath. *J. Chem. Phys.* **1984**, 81, 3684–3690.

- [14] G. S. Grest, K. Kremer., Molecular dynamics simulation for polymers in the presence of a heat bath. *Phys. Rev. A* **1986**, 33, 3628–3631.
- [15] P. Gonnet. P-SHAKE: a quadratically convergent SHAKE in  $O(n^2)$ . *J. Comput. Phys.* **2007**, 220, 740–750.
- [16] D. R. Roe T. E. Cheatham. PTRAJ and CPPTRAJ: Software for Processing and Analysis of Molecular Dynamics Trajectory Data. *J Chem Theory Com*, **2013**, 9, 3084–3095.
- [17] OriginLab Corporation. Origin 9.1 User Guide. [Http://Www.Originlab.Com/91](http://www.Originlab.Com/91) 1–210 (2013).
- [18] D. S. BIOVIA. Discovery Studio. **2017**.
- [19] B. Kuhn, P. Gerber, T. Schulz-Gasch, M. Stahl. Validation and use of the MM-PBSA approach for drug discovery. *J. Med. Chem.* **2005**, 48, 4040–4048.
- [20] C. Wang, D. Greene, L. Xiao, R. Qi, R. Luo. Recent Developments and Applications of the MMPBSA Method. *Front. Mol. Biosci.* **2018**, 4.
- [21] J. Cheung, M. J. Rudolph, F. Burshteyn, M. S. Cassidy, E. N. Gary, J. Love, M. C. Franklin, J. J. Height, ‘Structures of Human Acetylcholinesterase in Complex with Pharmacologically Important Ligands’, *J. Med. Chem.* **2012**, 55, 10282–10286.
- [22] O. Trott, A. J. Olson, ‘AutoDock Vina: improving the speed and accuracy of docking with a new scoring function, efficient optimization, and multithreading.’, *J. Comput. Chem.* **2010**, 31, 455–61.
